# Supplementary material for: Genomic and metabolic analysis of fluoranthene degradation pathway in Celeribacter indicus P73T
Source: PubMed Central journal article supplement — Sci Rep. 2015 Jan 13;5:7741. doi: 10.1038/srep07741 (PMC4291564; doi:10.1038/srep07741), 2015-01-13
Supplement: srep07741-s1.pdf [file srep07741-s1.pdf]

Supplementary Information for

**Genomic and metabolic analysis of fluoranthene degradation pathway in**

***Celeribacter indicus* P73<sup>T</sup>**

Junwei Cao<sup>1,2§</sup>, Qiliang Lai<sup>1§</sup>, Jun Yuan<sup>1</sup>, Zongze Shao<sup>1,2\*</sup>

<sup>1</sup>State Key Laboratory Breeding Base of Marine Genetic Resources; Key Laboratory of Marine Genetic Resources, The Third Institute of State Oceanic Administration; Key Laboratory of Marine Genetic Resources of Fujian Province; Collaborative Innovation Center of Deep Sea Biology; Collaborative Innovation Center for Exploitation and Utilization of Marine Biological Resources, Xiamen 361005, China

<sup>2</sup>School of Municipal and Environmental Engineering, Harbin Institute of Technology, Harbin 150090, China

\*Corresponding author: Zongze Shao. Tel: +86-592-2195390. Fax: +86-592-2085376.

E-mail: shaozz@163.com

§These authors contributed equally to this work

## Contents

|                                                                                                                                                               |    |
|---------------------------------------------------------------------------------------------------------------------------------------------------------------|----|
| Supplementary Text.....                                                                                                                                       | 4  |
| Text S1   COG analysis of the P73 <sup>T</sup> genome.....                                                                                                    | 4  |
| Text S2   Genomic islands .....                                                                                                                               | 4  |
| Text S3   Horizontal gene transfer .....                                                                                                                      | 5  |
| Text S4   Transport systems.....                                                                                                                              | 5  |
| Text S5   Regulation .....                                                                                                                                    | 7  |
| Text S6   Plasmids .....                                                                                                                                      | 8  |
| Text S7   Mutant generation.....                                                                                                                              | 9  |
| Text S8   Analysis of intermediate metabolites in fluoranthene degradation .....                                                                              | 10 |
| Supplementary Figures.....                                                                                                                                    | 12 |
| Figure S1   Genomic islands (GIs) in the P73T chromosome predicted using different methods. ....                                                              | 12 |
| Figure S2   COG distributions in the P73 <sup>T</sup> plasmids. ....                                                                                          | 13 |
| Figure S3   Dot plots between the <i>Celeribacter indicus</i> P73 <sup>T</sup> genome and the genomes of six closely related bacteria. ....                   | 14 |
| Figure S4.   GC-MS detection of metabolite I (acenaphthylene-1(2H)-one) obtained from fluoranthene degradation by strain P73 <sup>T</sup> . ....              | 15 |
| Figure S5   GC-MS detection of metabolite II (acenaphthenequinone) obtained from fluoranthene degradation by strain P73 <sup>T</sup> . ....                   | 15 |
| Figure S6   GC-MS detection of metabolite III (1,2-dihydroxyacenaphthylene) obtained from fluoranthene degradation by strain P73 <sup>T</sup> .....           | 16 |
| Figure S7   GC-MS detection of metabolite IV (1,8-naphthalic anhydride) obtained from fluoranthene degradation by strain P73 <sup>T</sup> . ....              | 16 |
| Supplementary Data .....                                                                                                                                      | 18 |
| Data S1   COG categories of the predicted <i>C. indicus</i> P73 <sup>T</sup> genes. ....                                                                      | 18 |
| Data S2   Predicted genomic islands (GIs), genes in the GIs, and COG categories of the genes in the P73 <sup>T</sup> genome.....                              | 18 |
| Data S3   Horizontally transferred genes in the <i>Celeribacter indicus</i> P73 <sup>T</sup> genome.....                                                      | 30 |
| Data S4   Transport protein genes in the <i>Celeribacter indicus</i> P73 <sup>T</sup> genome identified in the Transporter Classification (TC) Database. .... | 55 |
| Data S5   Transcription genes in the P73 <sup>T</sup> genome related to transcription (COG category K).....                                                   | 76 |
| Data S6   Genes in the P73 <sup>T</sup> genome related to lipid transport and metabolism COG categories.....                                                  | 83 |

|                                                                                                 |     |
|-------------------------------------------------------------------------------------------------|-----|
| Data S7   Genes in the P73 <sup>T</sup> genome related to cell motility and chemotaxis. ....    | 87  |
| Data S8   Genes in the P73 <sup>T</sup> genome involved in aromatic compounds degradation. .... | 89  |
| Data S9   Genes in the P73 <sup>T</sup> genome without homologs in the B30 genome. ....         | 93  |
| Supplementary References .....                                                                  | 128 |

## Supplementary Text

### Text S1 | COG analysis of the P73<sup>T</sup> genome

Among the 4827 predicted protein-coding sequences (CDSs), 3908 (80.96%) were assigned to 22 different clusters of orthologous groups (COGs) (Data S1), including amino acid transport and metabolism (category E, 9.39%); inorganic ion transport and metabolism (P, 8.34%); carbohydrate transport and metabolism (G, 7.18%); transcription (K, 7.09%); energy production and conversion (C, 6.46%); replication, recombination and repair (L, 5.83%); and cell wall/membrane/envelope biogenesis (M, 5.27%).

### Text S2 | Genomic islands

Genomic islands (GIs) were identified using IslandViewer<sup>1</sup>. Thirty-seven GIs (36 in the chromosome, one in plasmid pP73C) were predicted in the genome of strain P73<sup>T</sup> by SIGI-HMM<sup>1</sup>, comprising a total of 314,694-bp (6.33% of the genome) and 346 predicted CDSs (Figure S1, Data S2). Of the 346 CDSs, only 203 (58.67%) could be assigned to COGs, including replication, recombination and repair (L, up to 26.15%) and inorganic ion transport and metabolism (P, 11.93%), and both these categories were more abundant in the GIs than in the whole P73<sup>T</sup> genome. Four of the GIs (GIs 9, 20, 35, 37) had a similar GC content as the average GC content of the chromosome (66 mol%) or plasmids (60 mol%), while the other 33 GIs all had a lower GC content (55 mol% to 63 mol%) compared with the average GC content of the chromosome. Fifteen of the 37 GIs contained mobile genetic elements, such as genes encoding transposase and integrase, that made the GIs self-mobilize. It has been suggested that the 3' ends of the tRNAs are hot spots for the integration of foreign DNA into bacterial genomes<sup>2</sup>. In strain P73<sup>T</sup>, GI 1 was located close to the 3' end of tRNA-Met, GI 7 to tRNA-Ser, GI 9 to tRNA-Thr, GI 10 to tRNA-Ser, GI 18 to tRNA-Asn, GI 24 to

tRNA-OTHER, and GI 27 to tRNA-Arg, supporting the identification of these seven regions as GIs.

### **Text S3 | Horizontal gene transfer**

Horizontally transferred genes (HTG) in the P73<sup>T</sup> genome were identified against the genomes of other bacteria in the IMG database (24 October 2013). Most of the predicted HTG in strain P73<sup>T</sup> (56.6%, 424/749) had best hits to HTG from order *Rhizobiales* (Data S3). The COG analysis of these HTG showed that the genes assigned to inorganic ion transport and metabolism (12.12%), transcription (K, 11.36%), carbohydrate transport and metabolism (G, 9.72%), energy production and conversion (C, 7.95%), lipid transport and metabolism (I, 6.44%), and secondary metabolites biosynthesis transport and catabolism (Q, 6.44%) were more abundant in the *Rhizobiales* bacteria than in P73<sup>T</sup>. Genes likely involved in PAH degradation were found among these HTG, such as ferredoxin (P73\_0335, P73\_1051, and P73\_2118), ferredoxin:oxidoreductase FAD/NAD(P)-binding subunit (P73\_1054 and P73\_2874), ring-hydroxylating dioxygenases small subunit (P73\_2150), ring-hydroxylating dioxygenases large subunit (P73\_1053, P73\_1958, P73\_2151, P73\_2875 and P73\_4521), 4-hydroxylbenzoyl-CoA thioesterase (P73\_0182) in benzoate degradation, dibenzothiophene desulfurization enzyme (P73\_4012), naphthoate synthase (P73\_4474), and cytochrome P450 (P73\_0333 and P73\_4763) (Data S3). Some tripartite ATP-independent periplasmic (TRAP) transporter genes (e.g. P73\_0178 and P73\_0179), which may be involved in aromatic compounds transport, were also among the HTG. These results suggested that strain P73<sup>T</sup> may have used gene transfer to enhance its PAH degradation ability.

### **Text S4 | Transport systems**

A total of 848 transport protein genes (Data S4) belonging to 102 transporter families were identified in the Transporter Classification (TC) Database (<http://tcdb.org/>)<sup>3</sup>. These transport protein

genes made up about 17.57% of the total CDSs in the P73<sup>T</sup> genome compared with 13.01% in the average bacterial genome in the IMG database. The encoded proteins of 371 of these genes were assigned to the ATP-binding cassette (ABC) superfamily (TC:3.A.1), members of which have been reported to translocate a wide variety of substrates including sugars, hydrocarbons, amino acids, ions, peptides, vitamins, toxins, lipids, proteins, and a large number of hydrophobic compounds and metabolites, including aromatic compounds, across extra- and intra-cellular membranes<sup>4,5</sup>. A further 96 transport protein genes were found to encode proteins belonging to the tripartite ATP-independent periplasmic transporter (TRAP-T) family (TC:2.A.56), members of which have been shown to be involved in the transport of widely divergent compounds, mostly carboxylate derivatives, including a variety of aromatic compounds<sup>6</sup>. For example, genes in the P73<sup>T</sup> genome that encode TRAP transporters, namely P73\_0171, P73\_0172, P73\_0173, P73\_0178, and P73\_0179 were located close to the gentisate 1,2-dioxygenase gene (P73\_0175); P73\_0342, P73\_0343, and P73\_0344 were adjacent to ring-hydroxylating dioxygenase genes (P73\_0346 and P73\_0347); and P73\_2969 was close to the phthalate 4,5-dioxygenase gene (P73\_2968). This arrangement suggests that these TRAP transporters may be involved in the transport of aromatic compounds with carboxylate groups. The other transporter genes in the P73<sup>T</sup> genome were found to encode proteins belonging to the major facilitator superfamily (MFS, TC:2.A.1, 25 genes)<sup>7</sup>, the tricarboxylate transporter (TTT) family (TC:2.A.80, 8 genes)<sup>8</sup>, the outer membrane protein (FadL) family (TC:1.B.9, P73\_0184 and P73\_2224)<sup>9</sup>, and the benzoate:H<sup>+</sup> symporter (BenE) family (TC:2.A.46, P73\_3226)<sup>7</sup>, all of which have been reported to be involved in the uptake of various aromatic compounds. Transporter genes for environmental adaption were also found in the P73<sup>T</sup> genome: mercury ion transport protein genes (P73\_4790–4792); arsenite efflux pump genes (P73\_1256 and P73\_3784); chromate transporter

genes (P73\_2501 and P73\_4821); and a camphor resistance gene (P73\_0682).

### **Text S5 | Regulation**

The COG analysis identified 305 genes in the P73<sup>T</sup> genome that were assigned to the transcription (K, 7.09%) category (Data S5). Fifty-three of these genes were predicted to encode the LysR-type transcriptional regulator (LTTR) family of proteins (COG0583), which represents the most abundant type of transcriptional regulator in prokaryotes<sup>10</sup>. LTTR family transcriptional regulators regulate a diverse set of genes, including genes involved in virulence, metabolism (including aromatic compounds degradation), quorum sensing, and motility<sup>10,11</sup>. For example, P73\_0840, encoding the *pca* operon transcriptional activator PcaQ, was located in the *pca* gene cluster (P73\_0836–0845) responsible for protocatechuate degradation; the LTTR family transcriptional activator *nahR* (P73\_2028) was predicted previously to be salicylate-responsive<sup>12</sup>; and P73\_0332, encoding a LTTR transcriptional regulator, was adjacent to the homogentisate 1,2-dioxygenase gene (P73\_0329).

The multiple antibiotic resistance regulator (MarR) family (COG1846) were reported to regulate resistance to multiple antibiotics and degradation of aromatic compounds<sup>11</sup>. We identified 19 proteins in the P73<sup>T</sup> genome that belonged to the MarR family transcriptional regulators, such as P73\_0337, P73\_0357, P73\_1461, P73\_2961, and P73\_4393, which may regulate the degradation of aromatic compounds.

Ten genes were predicted to encode isocitrate lyase regulator (IclR) family transcriptional regulators, some members of which were reported to be involved in the degradation of aromatic compounds<sup>13</sup>; for example, P73\_0836 encoded a  $\beta$ -keto adipate pathway transcription regulator involved in protocatechuate degradation, and P73\_0183 and P73\_0327 encoded the IclR family

transcriptional regulators that regulate the degradation of aromatic compounds.

In addition, other transcriptional regulators that belong to the AraC, GntR, TetR, and FNR families or to two component regulatory systems have been reported to be associated with the degradation pathways of aromatic compounds<sup>11</sup>, and many genes in the P73<sup>T</sup> genome were predicted to encode transcriptional regulators that belong these family (Data S5).

### **Text S6 | Plasmids**

Together, the five plasmids in strain P73<sup>T</sup> contained 438 CDSs, accounting for 9.07% of the total CDSs in the genome. The COG analysis showed that the genes in four COG functional groups (information storage and processing, cellular processes and signaling, metabolism, and poorly characterized) were distributed quite differently among the plasmids, indicating a specialized function for each plasmid (Figure S2). pP73A mainly contained genes involved in metabolism, such as carbohydrate transport and metabolism (G), energy production and conversion (C), and lipid transport and metabolism (I), while the other four plasmids had low abundances of genes involved in metabolism and high abundances of genes with no COG assignment. The genes involved in cellular processes and signaling were much fewer in pP73A, and much more abundant in pP73B. pP73C and pP73D had high abundances of genes in replication, recombination and repair (L), intracellular trafficking, secretion, and vesicular transport (U), and cell cycle control, cell division, and chromosome partitioning (D).

Phylogenetic analysis of the plasmid partition protein (*parA*) and plasmid replication protein (*rep*) genes has been used previously to gain insight into the origin and evolution of plasmids<sup>14,15</sup>. Neighbor-joining phylogenetic trees were constructed with the Rep (Figure 2A) and ParA (Figure 2B) protein sequences encoded by genes from the P73<sup>T</sup> chromosome and plasmids. Plasmids pP73A,



pP73B, and pP73C had putative replication systems including the *repABC* gene family, which are common in  $\alpha$ -proteobacteria and essential for plasmid replication and stability<sup>16</sup>. Plasmid pP73D harbored a replication initiator protein A (RepA)-encoding gene (P73\_4797), and a ParA-encoding gene (P73\_4798), indicating that pP73D may be replicated by a theta replication mechanism<sup>17</sup>. Plasmid pP73E contained a replicase-encoding gene (P73\_4817), which is annotated as *Firmicute* plasmid replication protein (RepL), and a PemK-like protein-encoding gene (P73\_4819), which was reported to be responsible for plasmid stable inheritance<sup>18</sup>. No closely related homologue for the *parA* gene was detected in pP73E. Based on the HTG analysis, the replicative genes P73\_4797 and P73\_4817 were predicted to have originated from *Acetobacter aceti* ATCC 23746 (IMG Gene ID:2516943643) and the *Sphingobium yanoikuyae* ATCC 51230 (JCM 7371) plasmid pYAN-1, respectively (Data S3), in agreement with their predicted phylogenetic positions (Figure 2A). As shown in Figure 2, the ParA and Rep proteins encoded from the different plasmids belonged to different clades, suggesting that divergent evolution of the *parA* and *rep* genes had occurred, and confirming the important role of gene horizontal transfer, which has been reported previously<sup>14</sup>.

### **Text S7 | Mutant generation**

A gene deletion P73<sup>T</sup> mutant was generated using of the *cre-lox* recombination method reported by Marx and Lidstrom<sup>19</sup>. *Escherichia coli* WM3064 was used as the conjugal donor strain, and pJK100 (allelic-exchange vector, Tc<sup>R</sup>, Km<sup>R</sup>) was used as the suicide vector<sup>20</sup>. The flanking regions of the P73\_0346 gene targeted for deletion were amplified from genomic DNA with primer pairs:

0346UF, 5'-TAGATCTGAATTCAGACTGCCAGGGAGGAGTTTA-3' and 0346UR,  
 5'-GTACCAATTGTACAGCGCATCGCCAGATAGGT-3'; and 0346DF,  
 5'-CTACGTACGCGTGTTATTTCCGGGCCTGCCTAC-3' and 0346DR,

5'-GTGAGCTCACCGGTTCCCTCCCATGTTTGGTGTCTGT-3'. Then the flanking regions were inserted into the suicide vector pJK100 at the locations flanking a *loxP*-bounded kanamycin resistance cassette by ligation independent cloning<sup>21</sup>. The resultant plasmid pJK101 was transformed into the *E. coli* WM3064 conjugal donor strain, a strain that cannot grow without DAP. For conjugation, P73<sup>T</sup> was grown in 216L medium overnight, and then 1 mL of the culture was transferred to 10 mL fresh 216L. After 6–8 h of growth, 1 mL of the P73<sup>T</sup> culture was combined with the donor strain *E. coli* WM3064 at a ratio of 4:1; both strains were at an OD<sub>600</sub> = 0.6. The mixture was washed twice in 216L medium, resuspended in 200 µL of 216L and spotted onto a 216L agar plate with DAP (50 µg/mL). After 24 h of incubation at 28 °C, the cells were scraped off the plate, suspended in liquid 216L medium, washed twice in 216L, and spread onto a 216L agar plate with Km and no DAP. Positive double crossover integration of the suicide vector produced the mutant, ΔP73\_0346::*kan*, that was Km resistant and Tc sensitive. The mutant was verified by DNA sequencing.

### **Text S8 | Analysis of intermediate metabolites in fluoranthene degradation**

Strain P73<sup>T</sup> was grown in artificial sea water (ASM) medium<sup>73</sup> supplemented with fluoranthene (20 mg/L) as the sole source of carbon and energy at 28 °C and 160 rpm. Metabolites were extracted and processed for analysis as described previously<sup>4,5</sup>. After 96 h of incubation, the culture was centrifuged at 12,000 g for 2 min. The cell-free supernatant was extracted with an equal volume of ethyl acetate under neutral and acidic (pH 2.5) conditions. The organic layer was dried over anhydrous sodium sulfate, evaporated to dryness on a rotary evaporator, and dissolved in 1 mL acetonitrile. Prior to GC-MS analysis, the dissolved sample was trimethylsilylated with *N,O*-bis(trimethylsilyl)-trifluoroacetamide with 1% trimethylchlorosilane. 200 µL of the concentrate

and 100  $\mu\text{L}$  of the silylation reagent were mixed in a sealed 1.5-ml sample vial (Shanghai Quandao Company, China) and heated in a water bath at 68  $^{\circ}\text{C}$  for 1 h. After silylation, the samples were analyzed by GC-MS (QP2010, Shimadzu, Kyoto, Japan) in the SCAN mode. Metabolites were determined based on the molecular and fragment ions in the mass spectra and the chromatographic retention time ( $R_t$ ) of authentic compounds.

## Supplementary Figures

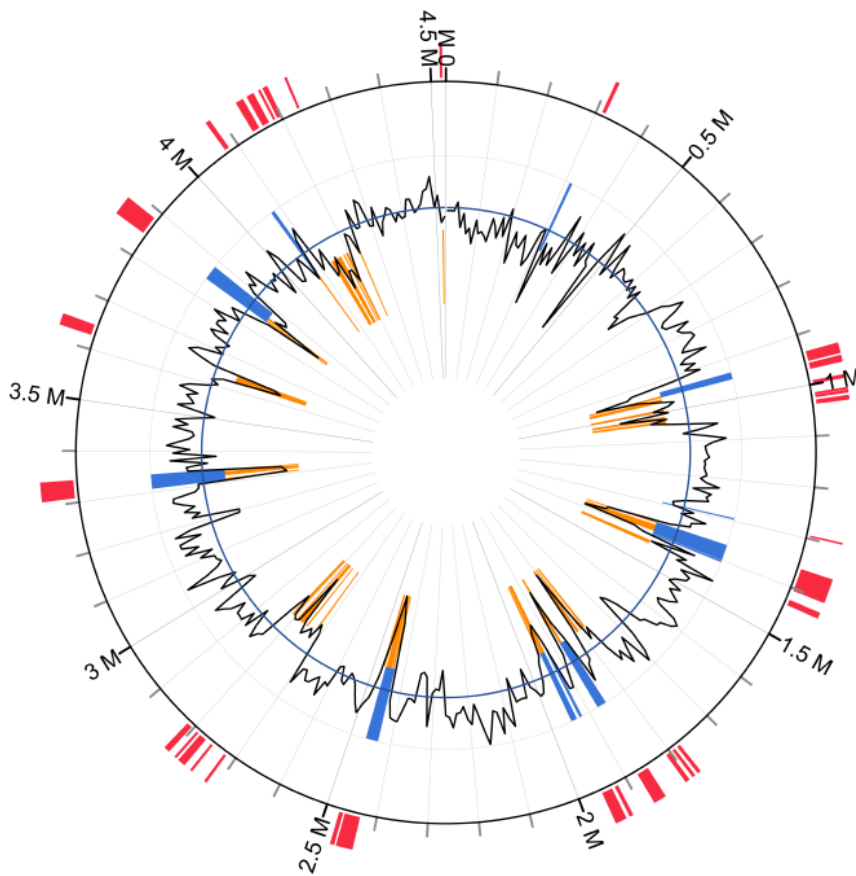

**Figure S1 | Genomic islands (GIs) in the P73T chromosome predicted using different methods.**

Rings 1 (red), 2 (blue), and 3 (orange) represent the GIs predicted by multiple methods, IslandPath-DIMOB, and SIGI-HMM<sup>1</sup>, respectively. The plot (black line) indicates the percentage of GC content.

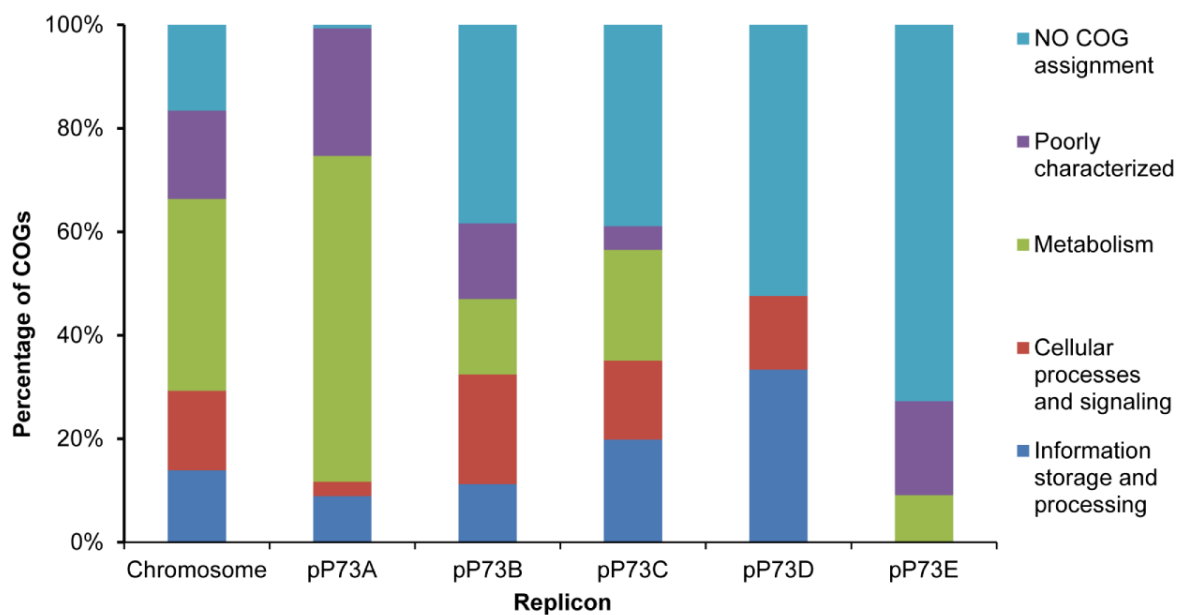

**Figure S2 | COG distributions in the P73<sup>T</sup> plasmids.** The COG categories were grouped into four functional clusters: (i) information storage and processing (J, K, L, B); (ii) cellular processes and signaling (D, V, T, M, N, Z, U, O); (iii) metabolism (C, G, E, F, H, I, P, Q); (iv) poorly characterized (R, S).

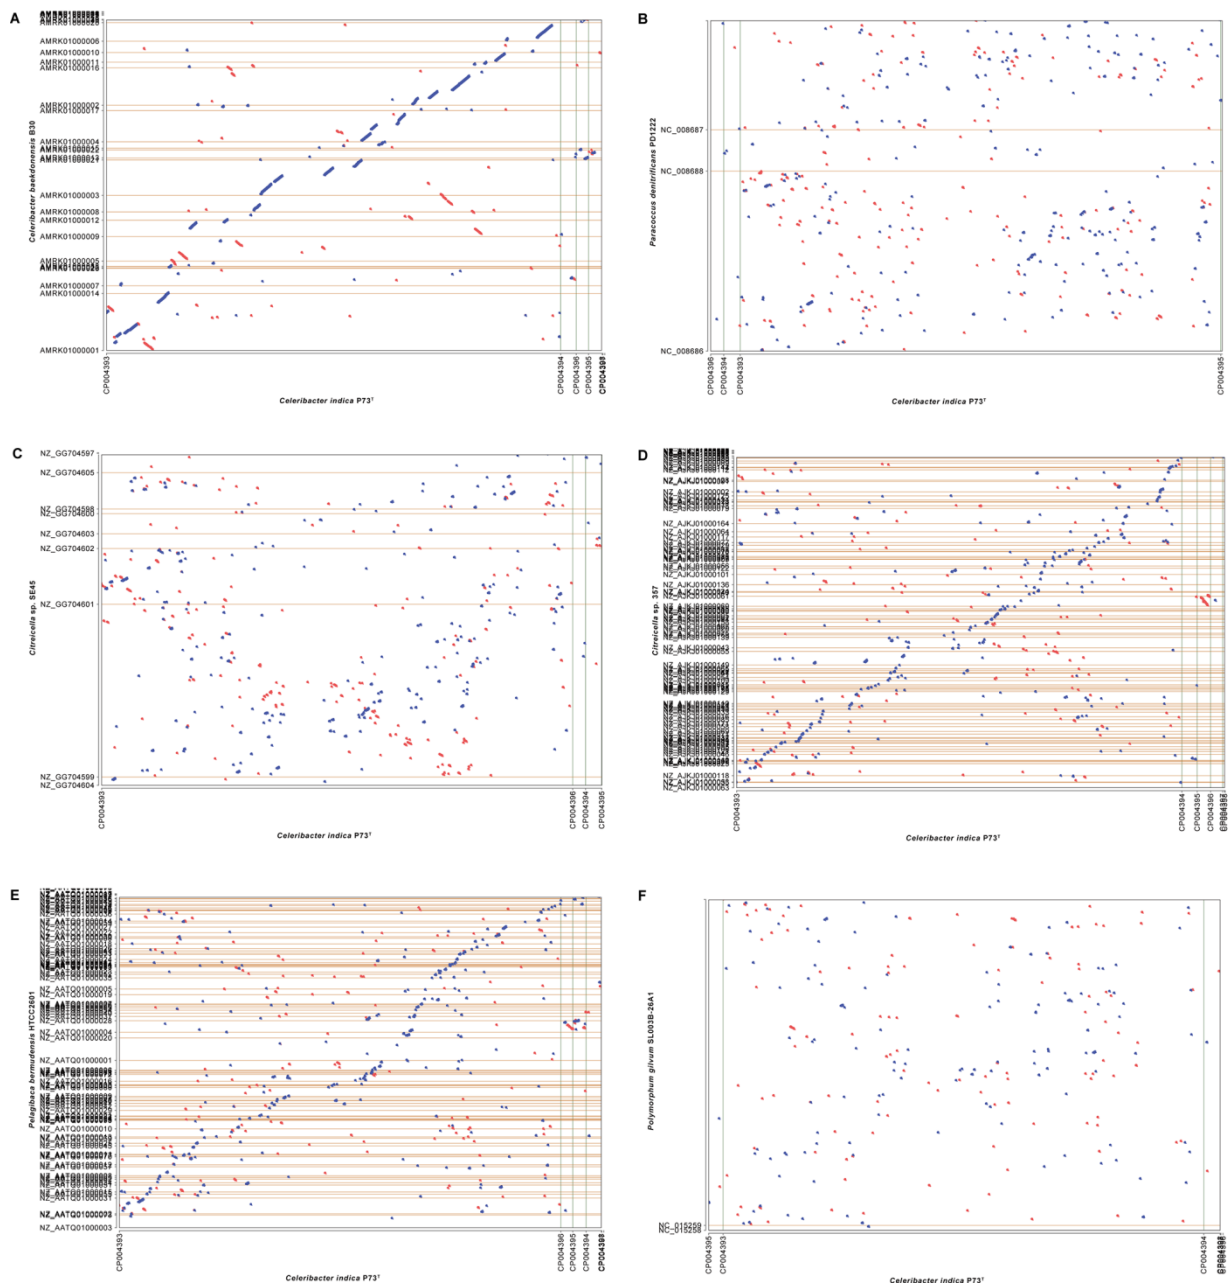

**Figure S3 | Dot plots between the *Celeribacter indicus* P73<sup>T</sup> genome and the genomes of six closely related bacteria. A, *Celeribacter baekdonensis* B30; B, *Paracoccus denitrificans* PD1222; C, *Citreicella* sp. SE45; D, *Citreicella* sp. 357; E, *Pelagibaca bermudensis* HTCC2601; F, *Polymorphum gilvum* SL003B-26A1. The MUMmer alignment program with the six frame amino acid translation of the DNA input sequences was used for the alignments. Red indicates the leading strand; blue indicates the lagging strand.**

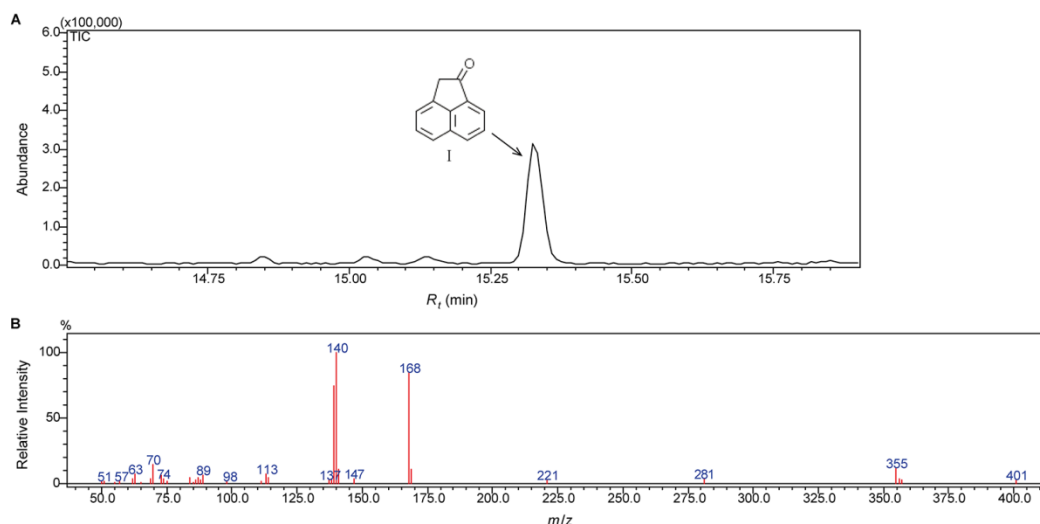

**Figure S4. | GC-MS detection of metabolite I (acenaphthylene-1(2H)-one) obtained from fluoranthene degradation by strain P73<sup>T</sup>. A, GC-MS profile; B, Mass spectrum. Metabolite I had a molecular ion at  $m/z$  (mass to charge ratio) 168 [ $M^+$ ] and major fragment ions at  $m/z$  140 ([M-28]), 139 ([M-29]), and 69 ([M-99]), and was proposed to be acenaphthylene-1(2H)-one (I).**

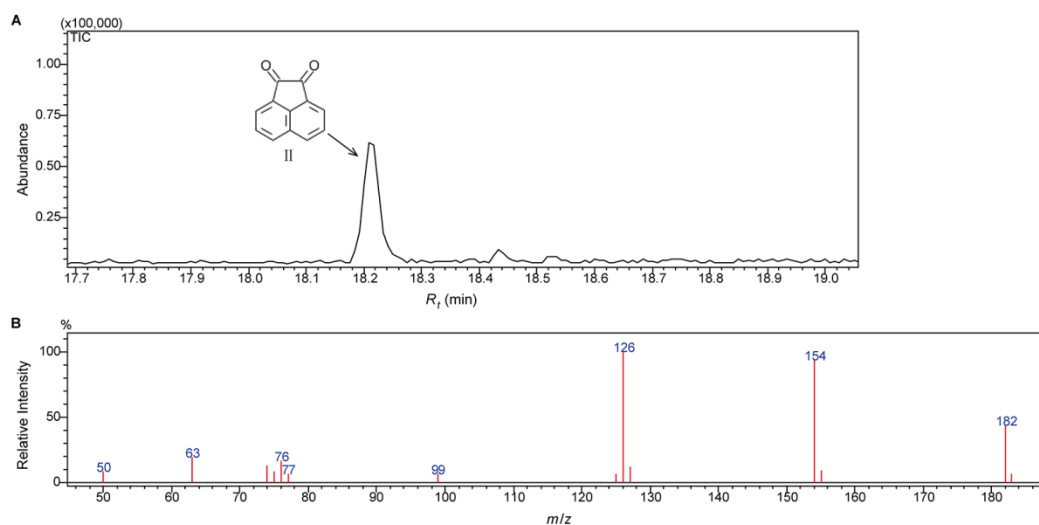

**Figure S5 | GC-MS detection of metabolite II (acenaphthenequinone) obtained from fluoranthene degradation by strain P73<sup>T</sup>. A, GC-MS profile; B, Mass spectrum. The metabolite peak had an  $R_t$  of 18.21 min,  $M^+$  of 182, and major fragment ions at  $m/z$  154 ([M-28]) and 126 ([M-56]), and this mass spectrum matched acenaphthenequinone (II) with a similarity of 90%.**

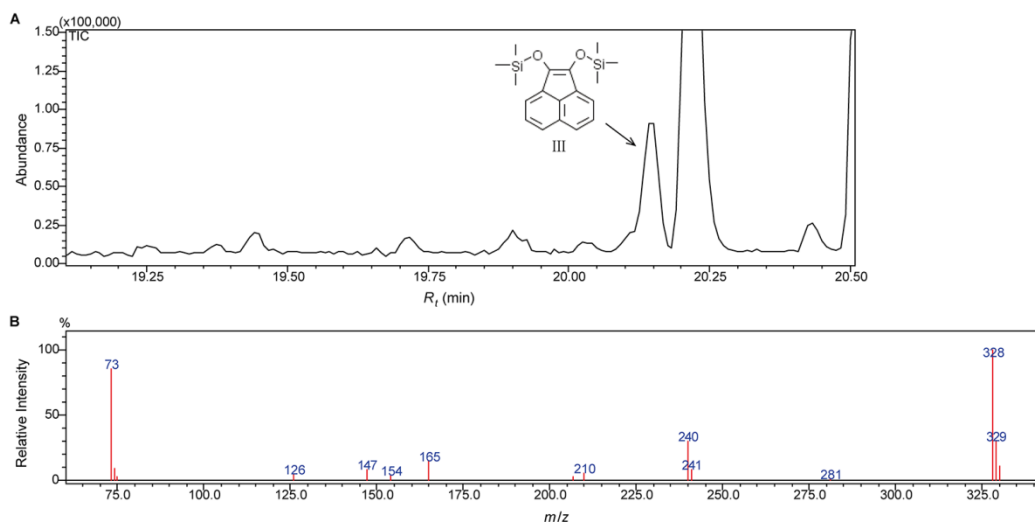

**Figure S6 | GC-MS detection of metabolite III (1,2-dihydroxyacenaphthylene) obtained from fluoranthene degradation by strain P73<sup>T</sup>.** A, GC-MS profile; B, Mass spectrum. The peak had an  $R_t$  of 20.15 min, a molecular ion at  $m/z$  328 [ $M^+$ ], and major fragment ions at  $m/z$  240 ([ $M-88$ ]) and 73 ([ $M-255$ ]), and this mass spectrum was comparable to that of acenaphthylene,1,2-bis(trimethylsilyloxy)-,trimethyl((2-[(trimethylsilyl)oxy]-1-acenaphthylenyl)oxy)silane. Therefore, this peak was predicted to correspond to a derivatized 1,2-dihydroxyacenaphthylene (III).

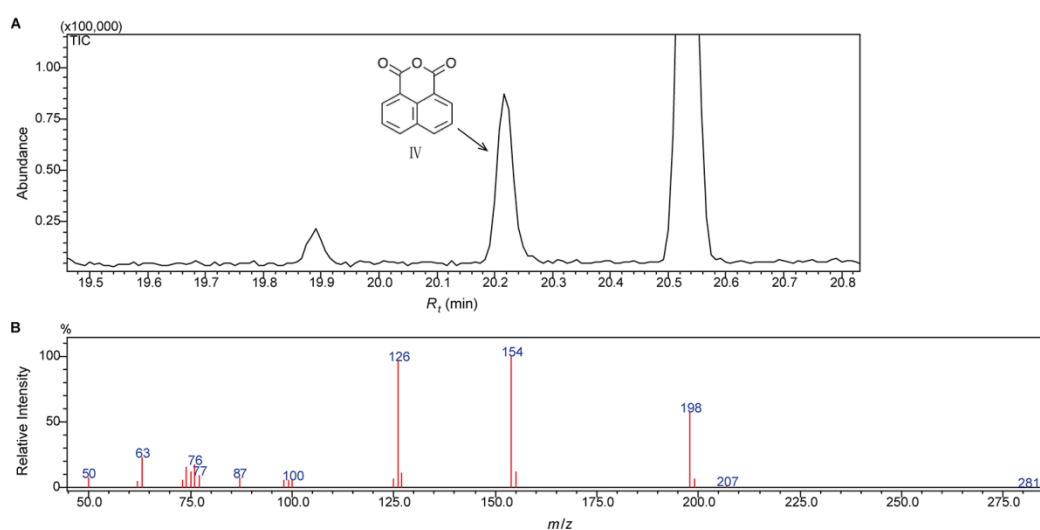

**Figure S7 | GC-MS detection of metabolite IV (1,8-naphthalic anhydride) obtained from fluoranthene degradation by strain P73<sup>T</sup>.** A, GC-MS profile; B, Mass spectrum. The metabolite



peak had an  $R_t$  of 20.22 min, a molecular ion at  $m/z$  198 [ $M^+$ ] and major fragment ions at  $m/z$  154 ([M-44]), 126 ([M-72]), and 63 ([M-135]), and this mass spectrum matched 1,8-naphthalic anhydride (IV) with a similarity of 93%.

## Supplementary Data

### Data S1 | COG categories of the predicted *C. indicus* P73<sup>T</sup> genes.

|       | COG categories                                                | Gene count | % of total |
|-------|---------------------------------------------------------------|------------|------------|
| R     | General function prediction only                              | 504        | 11.71      |
| E     | Amino acid transport and metabolism                           | 404        | 9.39       |
| S     | Function unknown                                              | 376        | 8.74       |
| P     | Inorganic ion transport and metabolism                        | 359        | 8.34       |
| G     | Carbohydrate transport and metabolism                         | 309        | 7.18       |
| K     | Transcription                                                 | 305        | 7.09       |
| C     | Energy production and conversion                              | 278        | 6.46       |
| L     | Replication, recombination and repair                         | 251        | 5.83       |
| M     | Cell wall/membrane/envelope biogenesis                        | 227        | 5.27       |
| J     | Translation, ribosomal structure and biogenesis               | 168        | 3.9        |
| H     | Coenzyme transport and metabolism                             | 165        | 3.83       |
| O     | Posttranslational modification, protein turnover, chaperones  | 162        | 3.76       |
| I     | Lipid transport and metabolism                                | 154        | 3.58       |
| Q     | Secondary metabolites biosynthesis transport and catabolism   | 138        | 3.21       |
| U     | Intracellular trafficking, secretion, and vesicular transport | 134        | 3.11       |
| T     | Signal transduction mechanisms                                | 134        | 3.11       |
| F     | Nucleotide transport and metabolism                           | 101        | 2.35       |
| N     | Cell motility                                                 | 51         | 1.18       |
| V     | Defense mechanisms                                            | 43         | 1          |
| D     | Cell cycle control, cell division, chromosome partitioning    | 38         | 0.88       |
| Z     | Cytoskeleton                                                  | 2          | 0.05       |
| B     | Chromatin structure and dynamics                              | 1          | 0.02       |
| Total |                                                               | 4304       |            |

**Data S2 | Predicted genomic islands (GIs), genes in the GIs, and COG categories of the genes in the P73<sup>T</sup> genome.** GIs predicted using different methods (Sheet 1); genes in the GIs predicted by the SIGI-HMM method (Sheet 2); and COG categories of the genes in the GIs (Sheet3).

#### Sheet 1 (Excel)

| Start        | End    | Size  | GI Prediction Program         | CDS No. | GC (mol%) |
|--------------|--------|-------|-------------------------------|---------|-----------|
| <b>pP73A</b> |        |       |                               |         |           |
| 134126       | 147776 | 13650 | Predicted by multiple methods |         |           |
| 134126       | 147776 | 13650 | IslandPath-DIMOB              |         |           |
|              |        |       |                               |         |           |
| <b>pP73B</b> |        |       |                               |         |           |

|                   |         |       |                               |   |      |
|-------------------|---------|-------|-------------------------------|---|------|
| 82019             | 90319   | 8300  | Predicted by multiple methods |   |      |
| 82019             | 90319   | 8300  | IslandPath-DIMOB              |   |      |
|                   |         |       |                               |   |      |
| <b>pP73C</b>      |         |       |                               |   |      |
| 10253             | 15689   | 5436  | Predicted by multiple methods |   |      |
| 75687             | 83910   | 8223  | Predicted by multiple methods |   | 60   |
| 10253             | 15689   | 5436  | SIGI-HMM                      | 7 | 60.4 |
| 75687             | 83910   | 8223  | IslandPath-DIMOB              |   |      |
|                   |         |       |                               |   |      |
| <b>Chromosome</b> |         |       |                               |   |      |
| 311050            | 317763  | 6713  | Predicted by multiple methods |   |      |
| 935216            | 954309  | 19093 | Predicted by multiple methods |   |      |
| 957883            | 970007  | 12124 | Predicted by multiple methods |   |      |
| 992143            | 999006  | 6863  | Predicted by multiple methods |   |      |
| 1015653           | 1019934 | 4281  | Predicted by multiple methods |   |      |
| 1020605           | 1025562 | 4957  | Predicted by multiple methods |   |      |
| 1029934           | 1038139 | 8205  | Predicted by multiple methods |   |      |
| 1293378           | 1296648 | 3270  | Predicted by multiple methods |   |      |
| 1360376           | 1404710 | 44334 | Predicted by multiple methods |   |      |
| 1423410           | 1434545 | 11135 | Predicted by multiple methods |   |      |
| 1777105           | 1783670 | 6565  | Predicted by multiple methods |   |      |
| 1789180           | 1795054 | 5874  | Predicted by multiple methods |   |      |
| 1801935           | 1810082 | 8147  | Predicted by multiple methods |   |      |
| 1853310           | 1876559 | 23249 | Predicted by multiple methods |   |      |
| 1919787           | 1926624 | 6837  | Predicted by multiple methods |   |      |
| 1932942           | 1953786 | 20844 | Predicted by multiple methods |   |      |
| 2431801           | 2461964 | 30163 | Predicted by multiple methods |   |      |
| 2465325           | 2473045 | 7720  | Predicted by multiple methods |   |      |
| 2717933           | 2723051 | 5118  | Predicted by multiple methods |   |      |
| 2750239           | 2754839 | 4600  | Predicted by multiple methods |   |      |
| 2767673           | 2781976 | 14303 | Predicted by multiple methods |   |      |
| 2786580           | 2791178 | 4598  | Predicted by multiple methods |   |      |
| 2804186           | 2815040 | 10854 | Predicted by multiple methods |   |      |
| 3308512           | 3343663 | 35151 | Predicted by multiple methods |   |      |
| 3627053           | 3647869 | 20816 | Predicted by multiple methods |   |      |
| 3848373           | 3883847 | 35474 | Predicted by multiple methods |   |      |
| 4073801           | 4082491 | 8690  | Predicted by multiple methods |   |      |
| 4137931           | 4152335 | 14404 | Predicted by multiple methods |   |      |
| 4159890           | 4173781 | 13891 | Predicted by multiple methods |   |      |
| 4182979           | 4187355 | 4376  | Predicted by multiple methods |   |      |
| 4191742           | 4200902 | 9160  | Predicted by multiple methods |   |      |
| 4234469           | 4238916 | 4447  | Predicted by multiple methods |   |      |
| 4517554           | 4522207 | 4653  | Predicted by multiple methods |   | 66   |

|         |         |       |                  |    |      |
|---------|---------|-------|------------------|----|------|
| 948053  | 954309  | 6256  | SIGI-HMM         | 11 | 60.9 |
| 957883  | 970007  | 12124 | SIGI-HMM         | 11 | 62.6 |
| 992143  | 999006  | 6863  | SIGI-HMM         | 12 | 60.9 |
| 1015653 | 1019934 | 4281  | SIGI-HMM         | 5  | 58.1 |
| 1020605 | 1025562 | 4957  | SIGI-HMM         | 7  | 61.3 |
| 1029934 | 1038139 | 8205  | SIGI-HMM         | 8  | 61.9 |
| 1360376 | 1364871 | 4495  | SIGI-HMM         | 3  | 56.4 |
| 1370830 | 1391441 | 20611 | SIGI-HMM         | 15 | 57.3 |
| 1423410 | 1434545 | 11135 | SIGI-HMM         | 12 | 65.7 |
| 1777105 | 1783670 | 6565  | SIGI-HMM         | 8  | 61.6 |
| 1789180 | 1795054 | 5874  | SIGI-HMM         | 7  | 58.7 |
| 1801935 | 1810082 | 8147  | SIGI-HMM         | 8  | 55   |
| 1868412 | 1876559 | 8147  | SIGI-HMM         | 8  | 55   |
| 1932942 | 1946181 | 13239 | SIGI-HMM         | 16 | 59.8 |
| 1947933 | 1953786 | 5853  | SIGI-HMM         | 9  | 63   |
| 2434811 | 2440717 | 5906  | SIGI-HMM         | 9  | 58.5 |
| 2442386 | 2460796 | 18410 | SIGI-HMM         | 22 | 55.7 |
| 2465325 | 2473045 | 7720  | SIGI-HMM         | 12 | 62.3 |
| 2717933 | 2723051 | 5118  | SIGI-HMM         | 7  | 61.4 |
| 2750239 | 2754839 | 4600  | SIGI-HMM         | 8  | 65.4 |
| 2767673 | 2781976 | 14303 | SIGI-HMM         | 16 | 58.9 |
| 2786580 | 2791178 | 4598  | SIGI-HMM         | 6  | 62.5 |
| 2804186 | 2815040 | 10854 | SIGI-HMM         | 12 | 60.3 |
| 3308855 | 3313845 | 4990  | SIGI-HMM         | 5  | 58.3 |
| 3323033 | 3335848 | 12815 | SIGI-HMM         | 10 | 56.3 |
| 3337843 | 3342531 | 4688  | SIGI-HMM         | 9  | 59.3 |
| 3627053 | 3647869 | 20816 | SIGI-HMM         | 13 | 58.9 |
| 3849567 | 3854060 | 4493  | SIGI-HMM         | 5  | 55.4 |
| 3856466 | 3863807 | 7341  | SIGI-HMM         | 10 | 59.1 |
| 4075898 | 4080821 | 4923  | SIGI-HMM         | 6  | 60.1 |
| 4137931 | 4152335 | 14404 | SIGI-HMM         | 12 | 62.9 |
| 4159890 | 4173781 | 13891 | SIGI-HMM         | 11 | 60.1 |
| 4182979 | 4187355 | 4376  | SIGI-HMM         | 7  | 58.8 |
| 4191742 | 4200902 | 9160  | SIGI-HMM         | 10 | 60.8 |
| 4234469 | 4238916 | 4447  | SIGI-HMM         | 5  | 65.1 |
| 4517554 | 4522207 | 4653  | SIGI-HMM         | 4  | 62.9 |
| 311050  | 317763  | 6713  | IslandPath-DIMOB |    |      |
| 935216  | 952356  | 17140 | IslandPath-DIMOB |    |      |
| 1293378 | 1296648 | 3270  | IslandPath-DIMOB |    |      |
| 1361089 | 1404710 | 43621 | IslandPath-DIMOB |    |      |
| 1853310 | 1876158 | 22848 | IslandPath-DIMOB |    |      |
| 1919787 | 1926624 | 6837  | IslandPath-DIMOB |    |      |
| 1933972 | 1948634 | 14662 | IslandPath-DIMOB |    |      |

|         |         |       |                  |  |  |
|---------|---------|-------|------------------|--|--|
| 2431801 | 2461964 | 30163 | IslandPath-DIMOB |  |  |
| 3308512 | 3343663 | 35151 | IslandPath-DIMOB |  |  |
| 3848373 | 3883847 | 35474 | IslandPath-DIMOB |  |  |
| 4073801 | 4082491 | 8690  | IslandPath-DIMOB |  |  |

**Sheet 2 (Excel)**

| GI                | Start  | End    | No. of CDSs | Locus_Tag | Product Name                                                                                             |
|-------------------|--------|--------|-------------|-----------|----------------------------------------------------------------------------------------------------------|
| <b>Chromosome</b> |        |        |             |           |                                                                                                          |
| 1                 | 948053 | 954309 | 11          | P73_0942  | Antirestriction protein                                                                                  |
| 1                 | 948053 | 954309 | 11          | P73_0943  | ssDNA-specific exonuclease RecJ                                                                          |
| 1                 | 948053 | 954309 | 11          | P73_0944  | DNA repair protein RadC                                                                                  |
| 1                 | 948053 | 954309 | 11          | P73_0945  | hypothetical protein                                                                                     |
| 1                 | 948053 | 954309 | 11          | P73_0946  | Uncharacterized conserved protein                                                                        |
| 1                 | 948053 | 954309 | 11          | P73_0947  | transposase IS3/IS911 family protein                                                                     |
| 1                 | 948053 | 954309 | 11          | P73_0948  | integrase catalytic subunit                                                                              |
| 1                 | 948053 | 954309 | 11          | P73_0949  | HNS-type DNA binding protein                                                                             |
| 1                 | 948053 | 954309 | 11          | P73_0950  | hypothetical protein                                                                                     |
| 1                 | 948053 | 954309 | 11          | P73_0951  | hypothetical protein                                                                                     |
| 1                 | 948053 | 954309 | 11          | P73_0952  | universal stress protein                                                                                 |
| 2                 | 957883 | 970007 | 11          | P73_0956  | hypothetical protein                                                                                     |
| 2                 | 957883 | 970007 | 11          | P73_0957  | hypothetical protein                                                                                     |
| 2                 | 957883 | 970007 | 11          | P73_0958  | hypothetical protein                                                                                     |
| 2                 | 957883 | 970007 | 11          | P73_0959  | integration host factor subunit beta                                                                     |
| 2                 | 957883 | 970007 | 11          | P73_0960  | hypothetical protein                                                                                     |
| 2                 | 957883 | 970007 | 11          | P73_0961  | methylase/helicase                                                                                       |
| 2                 | 957883 | 970007 | 11          | P73_0962  | Toprim domain                                                                                            |
| 2                 | 957883 | 970007 | 11          | P73_0963  | Predicted protease with the C-terminal PDZ domain                                                        |
| 2                 | 957883 | 970007 | 11          | P73_0964  | replicative DNA helicase                                                                                 |
| 2                 | 957883 | 970007 | 11          | P73_0965  | transmembrane protein                                                                                    |
| 2                 | 957883 | 970007 | 11          | P73_0966  | hypothetical protein                                                                                     |
| 3                 | 992143 | 999006 | 12          | P73_0994  | Uncharacterized conserved small protein                                                                  |
| 3                 | 992143 | 999006 | 12          | P73_0995  | LysR family transcriptional regulator                                                                    |
| 3                 | 992143 | 999006 | 12          | P73_0996  | putative ErfK/YbiS/YcfS/YnhG protein                                                                     |
| 3                 | 992143 | 999006 | 12          | P73_0997  | Allergen V5/Tpx-1 related protein                                                                        |
| 3                 | 992143 | 999006 | 12          | P73_0998  | Uncharacterized protein SCO1/SenC/PrrC, involved in biogenesis of respiratory and photosynthetic systems |
| 3                 | 992143 | 999006 | 12          | P73_0999  | signal peptide protein                                                                                   |
| 3                 | 992143 | 999006 | 12          | P73_1000  | SCO-like protein                                                                                         |
| 3                 | 992143 | 999006 | 12          | P73_1001  | hypothetical protein                                                                                     |
| 3                 | 992143 | 999006 | 12          | P73_1002  | Protein-disulfide isomerase                                                                              |
| 3                 | 992143 | 999006 | 12          | P73_1003  | disulfide bond formation-like protein                                                                    |

|   |         |         |    |          |                                                                |
|---|---------|---------|----|----------|----------------------------------------------------------------|
| 3 | 992143  | 999006  | 12 | P73_1004 | lipoprotein signal peptidase                                   |
| 3 | 992143  | 999006  | 12 | P73_1005 | S-isoprenylcysteine methyltransferase-like protein             |
| 4 | 1015653 | 1019934 | 5  | P73_1019 | integrase catalytic subunit                                    |
| 4 | 1015653 | 1019934 | 5  | P73_1020 | transposase IS3/IS911 family protein                           |
| 4 | 1015653 | 1019934 | 5  | P73_1021 | Predicted kinase                                               |
| 4 | 1015653 | 1019934 | 5  | P73_1022 | transposase, mutator type                                      |
| 4 | 1015653 | 1019934 | 5  | P73_1023 | DNA methylase N-4/N-6 domain-containing protein                |
| 5 | 1020605 | 1025562 | 7  | P73_1025 | hypothetical protein                                           |
| 5 | 1020605 | 1025562 | 7  | P73_1026 | Uncharacterized conserved protein (DUF2285)                    |
| 5 | 1020605 | 1025562 | 7  | P73_1027 | phage transcriptional regulator AlpA                           |
| 5 | 1020605 | 1025562 | 7  | P73_1028 | replication initiator protein A                                |
| 5 | 1020605 | 1025562 | 7  | P73_1029 | transposase                                                    |
| 5 | 1020605 | 1025562 | 7  | P73_1030 | transposase, orfB                                              |
| 5 | 1020605 | 1025562 | 7  | P73_1031 | transposase IS3/IS911 family protein                           |
| 6 | 1029934 | 1038139 | 8  | P73_1037 | transposase                                                    |
| 6 | 1029934 | 1038139 | 8  | P73_1038 | transposase                                                    |
| 6 | 1029934 | 1038139 | 8  | P73_1039 | binding-protein-dependent transporter inner membrane component |
| 6 | 1029934 | 1038139 | 8  | P73_1040 | ABC transporter                                                |
| 6 | 1029934 | 1038139 | 8  | P73_1041 | NMT1/THI5-like domain-containing protein                       |
| 6 | 1029934 | 1038139 | 8  | P73_1042 | methenyltetrahydrofolate synthetase                            |
| 6 | 1029934 | 1038139 | 8  | P73_1043 | RpiR family transcriptional regulator                          |
| 6 | 1029934 | 1038139 | 8  | P73_1044 | EmrB/QacA family drug resistance transporter                   |
| 7 | 1360376 | 1364871 | 3  | P73_1363 | hypothetical protein                                           |
| 7 | 1360376 | 1364871 | 3  | P73_1364 | ribose ABC transporter periplasmic binding protein             |
| 7 | 1360376 | 1364871 | 3  | P73_1365 | ABC transporter                                                |
| 8 | 1370830 | 1391441 | 15 | P73_1372 | D-isomer specific 2-hydroxyacid dehydrogenase                  |
| 8 | 1370830 | 1391441 | 15 | P73_1373 | autoinducer-2 (AI-2) kinase                                    |
| 8 | 1370830 | 1391441 | 15 | P73_1374 | Short chain dehydrogenase                                      |
| 8 | 1370830 | 1391441 | 15 | P73_1375 | transcriptional regulator                                      |
| 8 | 1370830 | 1391441 | 15 | P73_1376 | transcriptional regulator                                      |
| 8 | 1370830 | 1391441 | 15 | P73_1377 | D-lactate dehydrogenase (Cytochrome)                           |
| 8 | 1370830 | 1391441 | 15 | P73_1378 | TRAP transporter solute receptor subunit DctP family protein 7 |
| 8 | 1370830 | 1391441 | 15 | P73_1379 | C4-dicarboxylate transport system (Permease small protein)     |
| 8 | 1370830 | 1391441 | 15 | P73_1380 | C4-dicarboxylate transport system (Permease large protein)     |
| 8 | 1370830 | 1391441 | 15 | P73_1381 | acetaldehyde dehydrogenase                                     |
| 8 | 1370830 | 1391441 | 15 | P73_1382 | 4-hydroxy-2-oxovalerate/4-hydroxy-2-oxopentanoic acid aldolase |
| 8 | 1370830 | 1391441 | 15 | P73_1383 | hypothetical protein                                           |
| 8 | 1370830 | 1391441 | 15 | P73_1384 | hypothetical protein                                           |
| 8 | 1370830 | 1391441 | 15 | P73_1385 | HipA domain-containing protein                                 |
| 8 | 1370830 | 1391441 | 15 | P73_1386 | LysR family transcriptional regulator                          |

|    |         |         |    |          |                                                                           |
|----|---------|---------|----|----------|---------------------------------------------------------------------------|
| 9  | 1423410 | 1434545 | 12 | P73_1422 | hypothetical protein                                                      |
| 9  | 1423410 | 1434545 | 12 | P73_1423 | Reverse transcriptase (RNA-dependent DNA polymerase)                      |
| 9  | 1423410 | 1434545 | 12 | P73_1424 | hypothetical protein                                                      |
| 9  | 1423410 | 1434545 | 12 | P73_1425 | hypothetical protein                                                      |
| 9  | 1423410 | 1434545 | 12 | P73_1426 | hypothetical protein                                                      |
| 9  | 1423410 | 1434545 | 12 | P73_1427 | hypothetical protein                                                      |
| 9  | 1423410 | 1434545 | 12 | P73_1428 | hypothetical protein                                                      |
| 9  | 1423410 | 1434545 | 12 | P73_1429 | resolvase-like protein                                                    |
| 9  | 1423410 | 1434545 | 12 | P73_1430 | Bifunctional DNA primase/polymerase, N-terminal                           |
| 9  | 1423410 | 1434545 | 12 | P73_1431 | transcriptional regulator                                                 |
| 9  | 1423410 | 1434545 | 12 | P73_1432 | hypothetical protein                                                      |
| 9  | 1423410 | 1434545 | 12 | P73_1433 | phage integrase                                                           |
| 10 | 1777105 | 1783670 | 8  | P73_1767 | LysR family transcriptional regulator                                     |
| 10 | 1777105 | 1783670 | 8  | P73_1768 | TetR family transcriptional regulator                                     |
| 10 | 1777105 | 1783670 | 8  | P73_1769 | multidrug resistance protein A                                            |
| 10 | 1777105 | 1783670 | 8  | P73_1770 | major facilitator transporter                                             |
| 10 | 1777105 | 1783670 | 8  | P73_1771 | TetR family transcriptional regulator                                     |
| 10 | 1777105 | 1783670 | 8  | P73_1772 | TetR family transcriptional regulator                                     |
| 10 | 1777105 | 1783670 | 8  | P73_1773 | Domain of Unknown Function with PDB structure (DUF3861)                   |
| 10 | 1777105 | 1783670 | 8  | P73_1774 | dihydropterotic synthetase                                                |
| 11 | 1789180 | 1795054 | 7  | P73_1782 | replication initiator protein A                                           |
| 11 | 1789180 | 1795054 | 7  | P73_1783 | phage transcriptional regulator, AlpA                                     |
| 11 | 1789180 | 1795054 | 7  | P73_1784 | Uncharacterized conserved protein (DUF2285)                               |
| 11 | 1789180 | 1795054 | 7  | P73_1785 | integrase catalytic subunit                                               |
| 11 | 1789180 | 1795054 | 7  | P73_1786 | transposase IS3/IS911 family protein                                      |
| 11 | 1789180 | 1795054 | 7  | P73_1787 | Uncharacterized conserved protein (DUF2285)                               |
| 11 | 1789180 | 1795054 | 7  | P73_1788 | hypothetical protein                                                      |
| 12 | 1801935 | 1810082 | 8  | P73_1795 | helix-turn-helix domain-containing protein                                |
| 12 | 1801935 | 1810082 | 8  | P73_1796 | type I restriction-modification system M subunit                          |
| 12 | 1801935 | 1810082 | 8  | P73_1797 | restriction modification system DNA specificity domain-containing protein |
| 12 | 1801935 | 1810082 | 8  | P73_1798 | SMC protein, N-terminal domain-containing protein                         |
| 12 | 1801935 | 1810082 | 8  | P73_1799 | hypothetical protein                                                      |
| 12 | 1801935 | 1810082 | 8  | P73_1800 | Domain of unknown function (DUF3883)                                      |
| 12 | 1801935 | 1810082 | 8  | P73_1801 | hypothetical protein                                                      |
| 12 | 1801935 | 1810082 | 8  | P73_1802 | hypothetical protein                                                      |
| 13 | 1868412 | 1876559 | 8  | P73_1868 | helix-turn-helix domain-containing protein                                |
| 13 | 1868412 | 1876559 | 8  | P73_1869 | type I restriction-modification system M subunit                          |
| 13 | 1868412 | 1876559 | 8  | P73_1870 | restriction modification system DNA specificity domain-containing protein |
| 13 | 1868412 | 1876559 | 8  | P73_1871 | SMC protein, N-terminal domain-containing protein                         |
| 13 | 1868412 | 1876559 | 8  | P73_1872 | hypothetical protein                                                      |

|    |         |         |    |          |                                                                                                     |
|----|---------|---------|----|----------|-----------------------------------------------------------------------------------------------------|
| 13 | 1868412 | 1876559 | 8  | P73_1873 | Domain of unknown function (DUF3883)                                                                |
| 13 | 1868412 | 1876559 | 8  | P73_1874 | hypothetical protein                                                                                |
| 13 | 1868412 | 1876559 | 8  | P73_1875 | hypothetical protein                                                                                |
| 14 | 1932942 | 1946181 | 16 | P73_1939 | cytochrome c family protein                                                                         |
| 14 | 1932942 | 1946181 | 16 | P73_1940 | type 12 methyltransferase                                                                           |
| 14 | 1932942 | 1946181 | 16 | P73_1941 | hypothetical protein                                                                                |
| 14 | 1932942 | 1946181 | 16 | P73_1942 | Resolvase                                                                                           |
| 14 | 1932942 | 1946181 | 16 | P73_1943 | Inosine/uridine-preferring nucleoside hydrolase                                                     |
| 14 | 1932942 | 1946181 | 16 | P73_1944 | RpiR family transcriptional regulator                                                               |
| 14 | 1932942 | 1946181 | 16 | P73_1945 | twin-arginine translocation pathway signal                                                          |
| 14 | 1932942 | 1946181 | 16 | P73_1946 | twin-arginine translocation pathway signal                                                          |
| 14 | 1932942 | 1946181 | 16 | P73_1947 | S-adenosylhomocysteine deaminase, methylthioadenosine deaminase                                     |
| 14 | 1932942 | 1946181 | 16 | P73_1948 | ABC transporter                                                                                     |
| 14 | 1932942 | 1946181 | 16 | P73_1949 | nitrate/sulfonate/bicarbonate ABC transporter permease                                              |
| 14 | 1932942 | 1946181 | 16 | P73_1950 | ABC transporter-like protein permease                                                               |
| 14 | 1932942 | 1946181 | 16 | P73_1951 | nucleoside 2-deoxyribosyltransferase                                                                |
| 14 | 1932942 | 1946181 | 16 | P73_1952 | transposase, mutator type                                                                           |
| 14 | 1932942 | 1946181 | 16 | P73_1953 | integrase catalytic subunit                                                                         |
| 14 | 1932942 | 1946181 | 16 | P73_1954 | transposase IS3/IS911 family protein                                                                |
| 15 | 1947933 | 1953786 | 9  | P73_1956 | transcriptional regulator                                                                           |
| 15 | 1947933 | 1953786 | 9  | P73_1957 | transposase IS4 family protein                                                                      |
| 15 | 1947933 | 1953786 | 9  | P73_1958 | (2Fe-2S)-binding domain-containing protein                                                          |
| 15 | 1947933 | 1953786 | 9  | P73_1959 | SDR-family protein                                                                                  |
| 15 | 1947933 | 1953786 | 9  | P73_1960 | hypothetical protein                                                                                |
| 15 | 1947933 | 1953786 | 9  | P73_1961 | hypothetical protein                                                                                |
| 15 | 1947933 | 1953786 | 9  | P73_1962 | hypothetical protein                                                                                |
| 15 | 1947933 | 1953786 | 9  | P73_1963 | hypothetical protein                                                                                |
| 15 | 1947933 | 1953786 | 9  | P73_1964 | hypothetical protein                                                                                |
| 16 | 2434811 | 2440717 | 9  | P73_2428 | dTDP-4-dehydrorhamnose 3,5-epimerase                                                                |
| 16 | 2434811 | 2440717 | 9  | P73_2429 | dTDP-glucose 4,6-dehydratase                                                                        |
| 16 | 2434811 | 2440717 | 9  | P73_2430 | dTDP-4-dehydrorhamnose reductase                                                                    |
| 16 | 2434811 | 2440717 | 9  | P73_2431 | glucose-1-phosphate thymidyltransferase                                                             |
| 16 | 2434811 | 2440717 | 9  | P73_2432 | Transposase and inactivated derivatives                                                             |
| 16 | 2434811 | 2440717 | 9  | P73_2433 | transposase                                                                                         |
| 16 | 2434811 | 2440717 | 9  | P73_2434 | integrase catalytic region                                                                          |
| 16 | 2434811 | 2440717 | 9  | P73_2435 | transposase IS3/IS911 family protein                                                                |
| 16 | 2434811 | 2440717 | 9  | P73_2436 | IS66 Orf2 family protein                                                                            |
| 17 | 2442386 | 2460796 | 22 | P73_2438 | transposase                                                                                         |
| 17 | 2442386 | 2460796 | 22 | P73_2439 | UDP-N-acetylmuramyl pentapeptide phosphotransferase/UDP-N-acetylglucosamine-1-phosphate transferase |
| 17 | 2442386 | 2460796 | 22 | P73_2440 | Transcription antiterminator                                                                        |



|    |         |         |    |          |                                                     |
|----|---------|---------|----|----------|-----------------------------------------------------|
| 17 | 2442386 | 2460796 | 22 | P73_2441 | group 1 glycosyl transferase                        |
| 17 | 2442386 | 2460796 | 22 | P73_2442 | group 1 glycosyl transferase                        |
| 17 | 2442386 | 2460796 | 22 | P73_2443 | O-antigen ligase like membrane protein              |
| 17 | 2442386 | 2460796 | 22 | P73_2444 | glycosyl transferase family protein                 |
| 17 | 2442386 | 2460796 | 22 | P73_2445 | hypothetical protein                                |
| 17 | 2442386 | 2460796 | 22 | P73_2446 | Sulfotransferase family                             |
| 17 | 2442386 | 2460796 | 22 | P73_2447 | polysaccharide biosynthesis protein                 |
| 17 | 2442386 | 2460796 | 22 | P73_2448 | MarR family transcriptional regulator               |
| 17 | 2442386 | 2460796 | 22 | P73_2449 | transposase, mutator type                           |
| 17 | 2442386 | 2460796 | 22 | P73_2450 | transposase                                         |
| 17 | 2442386 | 2460796 | 22 | P73_2451 | integrase catalytic subunit                         |
| 17 | 2442386 | 2460796 | 22 | P73_2452 | transposase IS3/IS911 family protein                |
| 17 | 2442386 | 2460796 | 22 | P73_2453 | phage-related integrase                             |
| 17 | 2442386 | 2460796 | 22 | P73_2454 | RelE/StbE family addiction module toxin             |
| 17 | 2442386 | 2460796 | 22 | P73_2455 | hypothetical protein                                |
| 17 | 2442386 | 2460796 | 22 | P73_2456 | prophage CP4-57 regulatory                          |
| 17 | 2442386 | 2460796 | 22 | P73_2457 | hypothetical protein                                |
| 17 | 2442386 | 2460796 | 22 | P73_2458 | hypothetical protein                                |
| 17 | 2442386 | 2460796 | 22 | P73_2459 | hypothetical protein                                |
| 18 | 2465325 | 2473045 | 12 | P73_2466 | hypothetical protein                                |
| 18 | 2465325 | 2473045 | 12 | P73_2467 | HNH endonuclease                                    |
| 18 | 2465325 | 2473045 | 12 | P73_2468 | hypothetical protein                                |
| 18 | 2465325 | 2473045 | 12 | P73_2469 | phage protein                                       |
| 18 | 2465325 | 2473045 | 12 | P73_2470 | Phage protein, HK97, gp10                           |
| 18 | 2465325 | 2473045 | 12 | P73_2471 | Protein of unknown function (DUF3168)               |
| 18 | 2465325 | 2473045 | 12 | P73_2472 | phage head-tail adaptor                             |
| 18 | 2465325 | 2473045 | 12 | P73_2473 | P27 family phage terminase small subunit            |
| 18 | 2465325 | 2473045 | 12 | P73_2474 | Phage terminase-like protein                        |
| 18 | 2465325 | 2473045 | 12 | P73_2475 | Phage-related minor tail protein                    |
| 18 | 2465325 | 2473045 | 12 | P73_2476 | hypothetical protein                                |
| 18 | 2465325 | 2473045 | 12 | P73_2477 | hypothetical protein                                |
| 19 | 2717933 | 2723051 | 7  | P73_2715 | protease HtpX family protein                        |
| 19 | 2717933 | 2723051 | 7  | P73_2716 | Heat shock protein Hsp20                            |
| 19 | 2717933 | 2723051 | 7  | P73_2717 | heat shock protein Hsp20                            |
| 19 | 2717933 | 2723051 | 7  | P73_2718 | heat shock protein Hsp20                            |
| 19 | 2717933 | 2723051 | 7  | P73_2719 | LysR family transcriptional regulator               |
| 19 | 2717933 | 2723051 | 7  | P73_2720 | Uncharacterized conserved small protein             |
| 19 | 2717933 | 2723051 | 7  | P73_2721 | conjugation TrbI family protein                     |
| 20 | 2750239 | 2754839 | 8  | P73_2747 | lytic transglycosylase, catalytic                   |
| 20 | 2750239 | 2754839 | 8  | P73_2748 | Uncharacterized conserved protein                   |
| 20 | 2750239 | 2754839 | 8  | P73_2749 | conjugal transfer protein precursor                 |
| 20 | 2750239 | 2754839 | 8  | P73_2750 | Protein of unknown function (DUF2840)               |
| 20 | 2750239 | 2754839 | 8  | P73_2751 | plasmid segregation centromere-binding protein ParG |

|    |         |         |    |          |                                                                                      |
|----|---------|---------|----|----------|--------------------------------------------------------------------------------------|
| 20 | 2750239 | 2754839 | 8  | P73_2752 | ATPase involved in chromosome partitioning, putative                                 |
| 20 | 2750239 | 2754839 | 8  | P73_2753 | replication protein A                                                                |
| 20 | 2750239 | 2754839 | 8  | P73_2754 | Helix-turn-helix domain                                                              |
| 21 | 2767673 | 2781976 | 16 | P73_2766 | hypothetical protein                                                                 |
| 21 | 2767673 | 2781976 | 16 | P73_2767 | hypothetical protein                                                                 |
| 21 | 2767673 | 2781976 | 16 | P73_2768 | hypothetical protein                                                                 |
| 21 | 2767673 | 2781976 | 16 | P73_2769 | hypothetical protein                                                                 |
| 21 | 2767673 | 2781976 | 16 | P73_2770 | hypothetical protein                                                                 |
| 21 | 2767673 | 2781976 | 16 | P73_2771 | putative ATPase                                                                      |
| 21 | 2767673 | 2781976 | 16 | P73_2772 | peptidase S8 family protein                                                          |
| 21 | 2767673 | 2781976 | 16 | P73_2773 | Protein of unknown function (DUF982)                                                 |
| 21 | 2767673 | 2781976 | 16 | P73_2774 | hypothetical protein                                                                 |
| 21 | 2767673 | 2781976 | 16 | P73_2775 | putative cystein protease, Transglutaminase-like domain protein                      |
| 21 | 2767673 | 2781976 | 16 | P73_2776 | cold shock protein CspA                                                              |
| 21 | 2767673 | 2781976 | 16 | P73_2777 | hypothetical protein                                                                 |
| 21 | 2767673 | 2781976 | 16 | P73_2778 | hypothetical protein                                                                 |
| 21 | 2767673 | 2781976 | 16 | P73_2779 | K <sup>+</sup> -dependent Na <sup>+</sup> /Ca <sup>+</sup> exchanger related-protein |
| 21 | 2767673 | 2781976 | 16 | P73_2780 | Uncharacterized conserved protein                                                    |
| 21 | 2767673 | 2781976 | 16 | P73_2781 | hypothetical protein                                                                 |
| 22 | 2786580 | 2791178 | 6  | P73_2786 | Pyocin activator protein PrtN                                                        |
| 22 | 2786580 | 2791178 | 6  | P73_2787 | Domain of unknown function (DUF4095)                                                 |
| 22 | 2786580 | 2791178 | 6  | P73_2788 | hypothetical protein                                                                 |
| 22 | 2786580 | 2791178 | 6  | P73_2789 | putative cystein protease, Transglutaminase-like domain protein                      |
| 22 | 2786580 | 2791178 | 6  | P73_2790 | hypothetical protein                                                                 |
| 22 | 2786580 | 2791178 | 6  | P73_2791 | hypothetical protein                                                                 |
| 23 | 2804186 | 2815040 | 12 | P73_2797 | transglutaminase                                                                     |
| 23 | 2804186 | 2815040 | 12 | P73_2798 | Di- and tricarboxylate transporters                                                  |
| 23 | 2804186 | 2815040 | 12 | P73_2799 | CRP family transcriptional regulator                                                 |
| 23 | 2804186 | 2815040 | 12 | P73_2800 | hypothetical protein                                                                 |
| 23 | 2804186 | 2815040 | 12 | P73_2801 | fatty acid desaturase                                                                |
| 23 | 2804186 | 2815040 | 12 | P73_2802 | hypothetical protein                                                                 |
| 23 | 2804186 | 2815040 | 12 | P73_2803 | Transglutaminase-like enzymes, putative cysteine proteases                           |
| 23 | 2804186 | 2815040 | 12 | P73_2804 | hypothetical protein                                                                 |
| 23 | 2804186 | 2815040 | 12 | P73_2805 | hypothetical protein                                                                 |
| 23 | 2804186 | 2815040 | 12 | P73_2806 | hypothetical protein                                                                 |
| 23 | 2804186 | 2815040 | 12 | P73_2807 | hypothetical protein                                                                 |
| 23 | 2804186 | 2815040 | 12 | P73_2808 | hypothetical protein                                                                 |
| 24 | 3308855 | 3313845 | 5  | P73_3237 | hypothetical protein                                                                 |
| 24 | 3308855 | 3313845 | 5  | P73_3238 | hypothetical protein                                                                 |
| 24 | 3308855 | 3313845 | 5  | P73_3239 | hypothetical protein                                                                 |
| 24 | 3308855 | 3313845 | 5  | P73_3240 | phage/plasmid primase, P4 family, C-terminal domain                                  |

|    |         |         |    |          |                                                          |
|----|---------|---------|----|----------|----------------------------------------------------------|
| 24 | 3308855 | 3313845 | 5  | P73_3241 | hypothetical protein                                     |
| 25 | 3323033 | 3335848 | 10 | P73_3252 | hypothetical protein                                     |
| 25 | 3323033 | 3335848 | 10 | P73_3253 | hypothetical protein                                     |
| 25 | 3323033 | 3335848 | 10 | P73_3254 | bacteriophage DNA-invertase                              |
| 25 | 3323033 | 3335848 | 10 | P73_3255 | histone-like nucleoid-structuring protein H-NS           |
| 25 | 3323033 | 3335848 | 10 | P73_3256 | hypothetical protein                                     |
| 25 | 3323033 | 3335848 | 10 | P73_3257 | DNA methyltransferase                                    |
| 25 | 3323033 | 3335848 | 10 | P73_3258 | restriction enzyme                                       |
| 25 | 3323033 | 3335848 | 10 | P73_3259 | McrBC 5-methylcytosine restriction system component      |
| 25 | 3323033 | 3335848 | 10 | P73_3260 | antirestriction protein                                  |
| 25 | 3323033 | 3335848 | 10 | P73_3261 | hypothetical protein                                     |
| 26 | 3337843 | 3342531 | 9  | P73_3263 | hypothetical protein                                     |
| 26 | 3337843 | 3342531 | 9  | P73_3264 | hypothetical protein                                     |
| 26 | 3337843 | 3342531 | 9  | P73_3265 | hypothetical protein                                     |
| 26 | 3337843 | 3342531 | 9  | P73_3266 | hypothetical protein                                     |
| 26 | 3337843 | 3342531 | 9  | P73_3267 | phosphoglycerate kinase                                  |
| 26 | 3337843 | 3342531 | 9  | P73_3268 | hypothetical protein                                     |
| 26 | 3337843 | 3342531 | 9  | P73_3269 | hypothetical protein                                     |
| 26 | 3337843 | 3342531 | 9  | P73_3270 | relaxase/mobilization nuclease domain-containing protein |
| 26 | 3337843 | 3342531 | 9  | P73_3271 | hypothetical protein                                     |
| 27 | 3627053 | 3647869 | 13 | P73_3555 | EamA-like transporter family                             |
| 27 | 3627053 | 3647869 | 13 | P73_3556 | AAA domain                                               |
| 27 | 3627053 | 3647869 | 13 | P73_3557 | hypothetical protein                                     |
| 27 | 3627053 | 3647869 | 13 | P73_3558 | hypothetical protein                                     |
| 27 | 3627053 | 3647869 | 13 | P73_3559 | ATPase central domain-containing protein                 |
| 27 | 3627053 | 3647869 | 13 | P73_3560 | hypothetical protein                                     |
| 27 | 3627053 | 3647869 | 13 | P73_3561 | Molecular chaperone, HSP90 family                        |
| 27 | 3627053 | 3647869 | 13 | P73_3562 | endonuclease                                             |
| 27 | 3627053 | 3647869 | 13 | P73_3563 | Domain of unknown function (DUF4420)                     |
| 27 | 3627053 | 3647869 | 13 | P73_3564 | AIPR protein                                             |
| 27 | 3627053 | 3647869 | 13 | P73_3565 | DNA-cytosine methyltransferase                           |
| 27 | 3627053 | 3647869 | 13 | P73_3566 | DNA mismatch endonuclease Vsr                            |
| 27 | 3627053 | 3647869 | 13 | P73_3567 | TniQ                                                     |
| 28 | 3849567 | 3854060 | 5  | P73_3756 | hypothetical protein                                     |
| 28 | 3849567 | 3854060 | 5  | P73_3757 | hypothetical protein                                     |
| 28 | 3849567 | 3854060 | 5  | P73_3758 | hypothetical protein                                     |
| 28 | 3849567 | 3854060 | 5  | P73_3759 | integrase catalytic subunit                              |
| 28 | 3849567 | 3854060 | 5  | P73_3760 | transposase IS3/IS911 family protein                     |
| 29 | 3856466 | 3863807 | 10 | P73_3764 | hypothetical protein                                     |
| 29 | 3856466 | 3863807 | 10 | P73_3765 | hypothetical protein                                     |
| 29 | 3856466 | 3863807 | 10 | P73_3766 | Thermostable 8-oxoguanine DNA glycosylase                |
| 29 | 3856466 | 3863807 | 10 | P73_3767 | hypothetical protein                                     |
| 29 | 3856466 | 3863807 | 10 | P73_3768 | nucleoside 2-deoxyribosyltransferase family protein      |

|    |         |         |    |          |                                                                                |
|----|---------|---------|----|----------|--------------------------------------------------------------------------------|
| 29 | 3856466 | 3863807 | 10 | P73_3769 | Predicted PP-loop superfamily ATPase                                           |
| 29 | 3856466 | 3863807 | 10 | P73_3770 | transposase, IS4 family protein                                                |
| 29 | 3856466 | 3863807 | 10 | P73_3771 | hypothetical protein                                                           |
| 29 | 3856466 | 3863807 | 10 | P73_3772 | hypothetical protein                                                           |
| 29 | 3856466 | 3863807 | 10 | P73_3773 | hypothetical protein                                                           |
| 30 | 4075898 | 4080821 | 6  | P73_3970 | hypothetical protein                                                           |
| 30 | 4075898 | 4080821 | 6  | P73_3971 | major facilitator family protein                                               |
| 30 | 4075898 | 4080821 | 6  | P73_3972 | transposase                                                                    |
| 30 | 4075898 | 4080821 | 6  | P73_3973 | transposase                                                                    |
| 30 | 4075898 | 4080821 | 6  | P73_3974 | aldo/keto reductase                                                            |
| 30 | 4075898 | 4080821 | 6  | P73_3975 | transcriptional regulator                                                      |
| 31 | 4137931 | 4152335 | 12 | P73_4028 | extracellular solute-binding protein family 1 protein                          |
| 31 | 4137931 | 4152335 | 12 | P73_4029 | ribose-5-phosphate isomerase B                                                 |
| 31 | 4137931 | 4152335 | 12 | P73_4030 | LysR family transcriptional regulator                                          |
| 31 | 4137931 | 4152335 | 12 | P73_4031 | peptide ABC transporter ATP-binding protein                                    |
| 31 | 4137931 | 4152335 | 12 | P73_4032 | ABC transporter permease                                                       |
| 31 | 4137931 | 4152335 | 12 | P73_4033 | ABC transporter, membrane spanning protein (peptide)                           |
| 31 | 4137931 | 4152335 | 12 | P73_4034 | ABC transporter substrate binding protein                                      |
| 31 | 4137931 | 4152335 | 12 | P73_4035 | oligopeptide ABC transporter substrate binding protein                         |
| 31 | 4137931 | 4152335 | 12 | P73_4036 | aliphatic sulfonates family ABC transporter periplasmic ligand-binding protein |
| 31 | 4137931 | 4152335 | 12 | P73_4037 | acyl-CoA dehydrogenase                                                         |
| 31 | 4137931 | 4152335 | 12 | P73_4038 | monooxygenase                                                                  |
| 31 | 4137931 | 4152335 | 12 | P73_4039 | NAD-dependent epimerase/dehydratase                                            |
| 32 | 4159890 | 4173781 | 11 | P73_4045 | nodulation protein nolR                                                        |
| 32 | 4159890 | 4173781 | 11 | P73_4046 | thiamine pyrophosphate protein TPP binding domain-containing protein           |
| 32 | 4159890 | 4173781 | 11 | P73_4047 | Predicted membrane protein                                                     |
| 32 | 4159890 | 4173781 | 11 | P73_4048 | GntR family transcriptional regulator                                          |
| 32 | 4159890 | 4173781 | 11 | P73_4049 | family 5 extracellular solute-binding protein                                  |
| 32 | 4159890 | 4173781 | 11 | P73_4050 | binding-protein-dependent transporters inner membrane component                |
| 32 | 4159890 | 4173781 | 11 | P73_4051 | binding-protein-dependent transporters inner membrane component                |
| 32 | 4159890 | 4173781 | 11 | P73_4052 | ABC transporter                                                                |
| 32 | 4159890 | 4173781 | 11 | P73_4053 | NAD-dependent epimerase/dehydratase                                            |
| 32 | 4159890 | 4173781 | 11 | P73_4054 | short-chain dehydrogenase/reductase SDR                                        |
| 32 | 4159890 | 4173781 | 11 | P73_4055 | phenylhydantoinase                                                             |
| 33 | 4182979 | 4187355 | 7  | P73_4063 | hypothetical protein                                                           |
| 33 | 4182979 | 4187355 | 7  | P73_4064 | MarR family transcriptional regulator                                          |
| 33 | 4182979 | 4187355 | 7  | P73_4065 | polysaccharide biosynthesis protein                                            |
| 33 | 4182979 | 4187355 | 7  | P73_4066 | transposase IS3/IS911 family protein                                           |
| 33 | 4182979 | 4187355 | 7  | P73_4067 | transposase, orfB                                                              |

|              |         |         |    |          |                                                                   |
|--------------|---------|---------|----|----------|-------------------------------------------------------------------|
| 33           | 4182979 | 4187355 | 7  | P73_4068 | transposase IS3/IS911 family protein                              |
| 33           | 4182979 | 4187355 | 7  | P73_4069 | integrase catalytic subunit                                       |
| 34           | 4191742 | 4200902 | 10 | P73_4074 | nitrate/sulfonate/bicarbonate ABC transporter ATPase              |
| 34           | 4191742 | 4200902 | 10 | P73_4075 | ABC transporter permease                                          |
| 34           | 4191742 | 4200902 | 10 | P73_4076 | LysR family transcriptional regulator                             |
| 34           | 4191742 | 4200902 | 10 | P73_4077 | sulfonate/nitrate transporter                                     |
| 34           | 4191742 | 4200902 | 10 | P73_4078 | putative transposase                                              |
| 34           | 4191742 | 4200902 | 10 | P73_4079 | transposase                                                       |
| 34           | 4191742 | 4200902 | 10 | P73_4080 | transposase                                                       |
| 34           | 4191742 | 4200902 | 10 | P73_4081 | binding-protein-dependent transport system inner membrane protein |
| 34           | 4191742 | 4200902 | 10 | P73_4082 | putative sulfonate ABC transporter ATP-binding protein            |
| 34           | 4191742 | 4200902 | 10 | P73_4083 | ABC transporter substrate-binding protein                         |
| 35           | 4234469 | 4238916 | 5  | P73_4113 | Blr3415 protein                                                   |
| 35           | 4234469 | 4238916 | 5  | P73_4114 | nitrilotriacetate monooxygenase                                   |
| 35           | 4234469 | 4238916 | 5  | P73_4115 | ABC transporter                                                   |
| 35           | 4234469 | 4238916 | 5  | P73_4116 | binding-protein-dependent transport system inner membrane protein |
| 35           | 4234469 | 4238916 | 5  | P73_4117 | NMT1/THI5 like domain-containing protein                          |
| 36           | 4517554 | 4522207 | 4  | P73_4379 | transposase, IS4 family protein                                   |
| 36           | 4517554 | 4522207 | 4  | P73_4380 | transposase, IS4 family protein                                   |
| 36           | 4517554 | 4522207 | 4  | P73_4381 | transposase IS116/IS110/IS902 family protein                      |
| 36           | 4517554 | 4522207 | 4  | P73_4382 | Flagellar hook-length control protein FliK                        |
|              |         |         |    |          |                                                                   |
| <b>pP73C</b> |         |         |    |          |                                                                   |
| 37           | 10253   | 15689   | 7  | P73_4677 | Prokaryotic E2 family E                                           |
| 37           | 10253   | 15689   | 7  | P73_4678 | Multiubiquitin                                                    |
| 37           | 10253   | 15689   | 7  | P73_4679 | hypothetical protein                                              |
| 37           | 10253   | 15689   | 7  | P73_4680 | hypothetical protein                                              |
| 37           | 10253   | 15689   | 7  | P73_4681 | Predicted Zn peptidase                                            |
| 37           | 10253   | 15689   | 7  | P73_4682 | transposase, mutator type                                         |
| 37           | 10253   | 15689   | 7  | P73_4683 | single-stranded DNA-binding protein                               |

### Sheet 3 (Excel)

| COG | Gene count | % of Total |
|-----|------------|------------|
| L   | 57         | 26.15%     |
| P   | 26         | 11.93%     |
| K   | 20         | 9.17%      |
| R   | 16         | 7.34%      |
| E   | 15         | 6.88%      |
| G   | 12         | 5.50%      |
| M   | 12         | 5.50%      |
| O   | 12         | 5.50%      |

|       |     |       |
|-------|-----|-------|
| S     | 11  | 5.05% |
| V     | 7   | 3.21% |
| C     | 6   | 2.75% |
| H     | 6   | 2.75% |
| F     | 5   | 2.29% |
| I     | 3   | 1.38% |
| U     | 3   | 1.38% |
| D     | 2   | 0.92% |
| Q     | 2   | 0.92% |
| T     | 2   | 0.92% |
| J     | 1   | 0.46% |
| Total | 218 | 1     |

**Data S3 | Horizontally transferred genes in the *Celeribacter indicus* P73<sup>T</sup> genome.** Horizontally transferred Genes (HTG) predicted in the IMG database (24 October 2013, Sheet 1); COG categories of HTG (Sheet 2).

**Sheet 1 (Excel)**

| Locus Tag | Product Name                                          | From Genome                           |
|-----------|-------------------------------------------------------|---------------------------------------|
| P73_0008  | transposase                                           | Rhodopseudomonas palustris TIE-1      |
| P73_0009  | transposase                                           | Bradyrhizobium sp. BTAi1              |
| P73_0074  | AraC family transcriptional regulator                 | Nitratireductor indicus C115          |
| P73_0075  | phospholipid-binding protein                          | Nitratireductor indicus C115          |
| P73_0160  | Transcriptional Regulator, LysR family protein        | Pseudomonas psychrophila HA-4         |
| P73_0161  | CDP-6-deoxy-delta-3,4-glucoseen reductase             | Bordetella petrii Se-1111R, DSM 12804 |
| P73_0163  | hydrolase                                             | Pseudomonas resinovorans DSM 21078    |
| P73_0164  | carbon monoxide dehydrogenase subunit G               | Azospirillum halopraeferens DSM 3675  |
| P73_0165  | molybdopterin dehydrogenase FAD-binding protein       | Burkholderia graminis C4D1M           |
| P73_0166  | xanthine dehydrogenase                                | Burkholderia sp. UYPR1.413            |
| P73_0167  | (2Fe-2S)-binding domain-containing protein            | Burkholderia sp. WSM3556              |
| P73_0169  | fumarylacetoacetate (FAA) hydrolase                   | Cupriavidus necator N-1, ATCC 43291   |
| P73_0170  | putative carboxymethylenebutenolidase                 | Bradyrhizobium sp. S23321             |
| P73_0178  | TRAP transporter, 4TM/12TM fusion protein             | Nitratireductor pacificus pht-3B      |
| P73_0179  | TRAP transporter solute receptor, TAXI family protein | Nitratireductor pacificus pht-3B      |
| P73_0181  | long-chain-fatty-acid-CoA ligase                      | Nitratireductor pacificus pht-3B      |

|          |                                                        |                                                               |
|----------|--------------------------------------------------------|---------------------------------------------------------------|
| P73_0182 | 4-hydroxybenzoyl-CoA Thioesterase                      | Nitratireductor pacificus pht-3B                              |
| P73_0183 | transcriptional repressor                              | Nitratireductor pacificus pht-3B                              |
| P73_0185 | flavin reductase domain-containing FMN-binding protein | Frankia sp. Eu11c                                             |
| P73_0186 | TetR family transcriptional regulator                  | Amycolatopsis taiwanensis DSM 45107                           |
| P73_0187 | acyl-CoA dehydrogenase-like protein                    | Mycobacterium sp. MOTT36Y                                     |
| P73_0224 | short-chain dehydrogenase/reductase sdr                | Amycolatopsis thermoflava N1165, DSM 44574                    |
| P73_0226 | Predicted xylanase/chitin deacetylase                  | Chromobacterium violaceum ATCC 12472                          |
| P73_0227 | xylose isomerase domain-containing protein             | Gamma proteobacterium sp. NOR51-B                             |
| P73_0228 | short chain dehydrogenase                              | Streptomyces clavuligerus ATCC 27064                          |
| P73_0229 | sugar ABC transporter                                  | Rhizobium rhizogenes K84                                      |
| P73_0231 | ribose ABC transporter                                 | Rhizobium rhizogenes K84                                      |
| P73_0232 | antibiotic biosynthesis monooxygenase                  | Cupriavidus necator N-1, ATCC 43291                           |
| P73_0233 | MarR family transcriptional regulator                  | Cupriavidus necator N-1, ATCC 43291                           |
| P73_0310 | Protein of unknown function DUF262                     | Rhodococcus sp. 114MFTsu3.1                                   |
| P73_0329 | homogentisate 1,2-dioxygenase                          | Bradyrhizobium sp. ORS285                                     |
| P73_0330 | fumarylacetoacetate hydrolase family protein           | Burkholderia gladioli BSR3                                    |
| P73_0332 | LysR family transcriptional regulator                  | Burkholderia cenocepacia PC184                                |
| P73_0333 | cytochrome P450                                        | Parvibaculum lavamentivorans DS-1                             |
| P73_0335 | ferredoxin                                             | Asticcacaulis excentricus CB 48                               |
| P73_0337 | MarR family transcriptional regulator                  | Nisaea denitrificans DSM 18348                                |
| P73_0338 | long-chain-fatty-acid--CoA ligase                      | Rhodocista centenaria SW                                      |
| P73_0339 | enoyl-CoA hydratase                                    | Azoarcus toluclasticus ATCC 700605                            |
| P73_0341 | thiolase                                               | Burkholderia sp. WSM4176                                      |
| P73_0373 | Domain of unknown function (DUF4145)                   | Bradyrhizobium sp. BTAi1                                      |
| P73_0479 | hypothetical protein                                   | Rhizobium rhizogenes K84                                      |
| P73_0480 | phosphoglycerate mutase                                | Inquilingus limosus DSM 16000                                 |
| P73_0497 | ABC transporter substrate-binding protein              | Nitratireductor indicus C115                                  |
| P73_0498 | ABC transporter                                        | Nitratireductor indicus C115                                  |
| P73_0499 | hypothetical protein                                   | Mesorhizobium opportunistum WSM2075 (final version from ORNL) |
| P73_0500 | ribose ABC transporter ATP-binding protein             | Bradyrhizobium sp. BTAi1                                      |
| P73_0501 | 3-hydroxybutyryl-CoA dehydrogenase                     | Marteella mediterranea DSM 17316                              |

|          |                                                            |                                        |
|----------|------------------------------------------------------------|----------------------------------------|
| P73_0502 | alcohol dehydrogenase                                      | Burkholderia sp. JPY251                |
| P73_0503 | putative periplasmic substrate binding protein             | Marteella mediterranea DSM 17316       |
| P73_0504 | TRAP-type C4-dicarboxylate transport system small permease | Marteella mediterranea DSM 17316       |
| P73_0505 | TRAP dicarboxylate transporter                             | Marteella mediterranea DSM 17316       |
| P73_0506 | aldehyde dehydrogenase                                     | Bradyrhizobium sp. ORS285              |
| P73_0700 | Polysaccharide pyruvyl transferase                         | Flavobacterium antarcticum DSM 19726   |
| P73_0702 | hypothetical protein                                       | Truepera radiovictrix RQ-24, DSM 17093 |
| P73_0703 | polysaccharide export protein, translocase                 | Thioalkalivibrio sp. ALMg9             |
| P73_0707 | hypothetical protein                                       | Pelagibacterium halotolerans B2        |
| P73_0708 | glycosyl transferase group 1                               | Chitinilyticum litopenaei DSM 21440    |
| P73_0709 | dTDP-glucose 4,6-dehydratase                               | Bacillus thuringiensis BMB171          |
| P73_0710 | family 2 glycosyl transferase                              | Methylocaldum szegediense O-12         |
| P73_0711 | putative Glycosyl transferase, group 1                     | Azospirillum sp. B510                  |
| P73_0712 | acyltransferase 3                                          | Bradyrhizobium sp. WSM2254             |
| P73_0934 | hypothetical protein                                       | Xanthobacter autotrophicus Py2         |
| P73_0935 | DNA polymerase IV                                          | Rhodospirillum photometricum DSM 122   |
| P73_0937 | ATPase AAA                                                 | Kaistia granuli DSM 23481              |
| P73_0939 | DEAD/DEAH box helicase                                     | Rhodopseudomonas palustris DX-1        |
| P73_0949 | HNS-type DNA binding protein                               | Rhizobium mongolense USDA 1844         |
| P73_0960 | hypothetical protein                                       | Desulfarculus baarsii 2st14, DSM 2075  |
| P73_0964 | replicative DNA helicase                                   | Methylobacterium nodulans ORS 2060     |
| P73_0966 | hypothetical protein                                       | Ochrobactrum anthropi ATCC 49188       |
| P73_0967 | single-stranded DNA-binding protein                        | Ochrobactrum anthropi ATCC 49188       |
| P73_0968 | XRE family transcriptional regulator                       | Bradyrhizobium japonicum in8p8         |
| P73_0969 | Uncharacterized conserved protein (DUF2285)                | Ochrobactrum anthropi ATCC 49188       |
| P73_0970 | hypothetical protein                                       | Ochrobactrum anthropi ATCC 49188       |
| P73_0971 | Uncharacterized conserved protein (DUF2285)                | Ochrobactrum anthropi ATCC 49188       |



|          |                                                                      |                                      |
|----------|----------------------------------------------------------------------|--------------------------------------|
| P73_0975 | plasmid segregation centromere-binding protein ParG                  | Ochrobactrum anthropi ATCC 49188     |
| P73_0977 | conjugal transfer protein precursor                                  | Ochrobactrum anthropi ATCC 49188     |
| P73_0979 | lytic transglycosylase                                               | Ochrobactrum anthropi ATCC 49188     |
| P73_0980 | Type IV secretory pathway, VirD2 components (relaxase)               | Ochrobactrum anthropi ATCC 49188     |
| P73_0981 | conjugal transfer coupling protein TraG                              | Ochrobactrum anthropi ATCC 49188     |
| P73_0985 | conjugal transfer protein TrbC                                       | Nitratireductor indicus C115         |
| P73_0988 | conjugal transfer protein TrbJ                                       | Ochrobactrum anthropi ATCC 49188     |
| P73_0989 | hypothetical protein                                                 | Ochrobactrum anthropi ATCC 49188     |
| P73_0993 | conjugation TrbI family protein                                      | Kaistia adipata DSM 17808            |
| P73_0994 | Uncharacterized conserved small protein                              | Agrobacterium sp. 224MFTsu3.1        |
| P73_0995 | LysR family transcriptional regulator                                | Ochrobactrum anthropi ATCC 49188     |
| P73_1007 | Uncharacterized protein conserved in bacteria                        | Caulobacter crescentus OR37          |
| P73_1008 | cobalt-zinc-cadmium resistance protein CzcD                          | Nitratireductor indicus C115         |
| P73_1018 | 60 kDa chaperonin                                                    | Ensifer fredii USDA 257              |
| P73_1025 | hypothetical protein                                                 | Chelativorans sp. BNC1               |
| P73_1026 | Uncharacterized conserved protein (DUF2285)                          | Hyphomicrobium zavarzinii ATCC 27496 |
| P73_1028 | replication initiator protein A                                      | Hoeflea sp. 108                      |
| P73_1029 | transposase                                                          | Hoeflea sp. 108                      |
| P73_1032 | Ubiquinone/menaquinone biosynthesis methyltransferase                | Agrobacterium sp. H13-3              |
| P73_1039 | binding-protein-dependent transporter inner membrane component       | Thiothrix flexilis DSM 14609         |
| P73_1040 | ABC transporter                                                      | Thiothrix flexilis DSM 14609         |
| P73_1041 | NMT1/THI5-like domain-containing protein                             | Thiothrix flexilis DSM 14609         |
| P73_1042 | methenyltetrahydrofolate synthetase                                  | Thiothrix flexilis DSM 14609         |
| P73_1044 | EmrB/QacA family drug resistance transporter                         | Inquilinus limosus DSM 16000         |
| P73_1045 | oligopeptide ABC transporter oligopeptide-binding protein            | Rhizobium sp. CF142                  |
| P73_1046 | ABC transporter ATP-binding protein                                  | Rhizobium sp. CF142                  |
| P73_1047 | peptide ABC transporter permease                                     | Rhizobium sp. CF142                  |
| P73_1048 | binding-protein-dependent transport systems inner membrane component | Rhizobium sp. CF142                  |
| P73_1051 | aromatic-ring-hydroxylating dioxygenase, ferredoxin subunit          | Rhizobium sp. CF142                  |
| P73_1052 | LysR family transcriptional regulator                                | Rhizobium sp. CF142                  |
| P73_1053 | Rieske (2Fe-2S) protein                                              | Rhizobium sp. CF142                  |

|          |                                                                        |                                              |
|----------|------------------------------------------------------------------------|----------------------------------------------|
| P73_1054 | FAD-dependent pyridine nucleotide-disulfide oxidoreductase             | Rhizobium sp. CF142                          |
| P73_1055 | FabG                                                                   | Rhizobium sp. CF142                          |
| P73_1064 | LysR family transcriptional regulator                                  | Bradyrhizobium elkanii WSM2783               |
| P73_1065 | oxidoreductase short-chain dehydrogenase/reductase family protein YdfG | Ensifer arboris LMG 14919                    |
| P73_1071 | CinA domain-containing protein                                         | Citromicrobium sp. JLT1363                   |
| P73_1088 | alcohol dehydrogenase zinc-binding domain protein                      | Sphingomonas sp. LH128                       |
| P73_1089 | TetR family transcriptional regulator                                  | Rhizobium leguminosarum bv. trifolii WSM1325 |
| P73_1090 | NAD-dependent epimerase/dehydratase                                    | Roseomonas cervicalis ATCC 49957             |
| P73_1091 | XRE family transcriptional regulator                                   | Luteibacter sp. 22Crub2.1                    |
| P73_1098 | protein fecR                                                           | Agrobacterium albertimagni AOL15             |
| P73_1099 | RNA polymerase sigma-70 family protein                                 | Pseudomonas sp. M1                           |
| P73_1100 | lipoprotein                                                            | Hoeflea sp. 108                              |
| P73_1101 | ABC transporter                                                        | Nitratireductor aquibiodomus RA22 (Draft1)   |
| P73_1102 | ABC transporter                                                        | Hoeflea sp. 108                              |
| P73_1103 | binding-protein-dependent transport system inner membrane protein      | Nitratireductor aquibiodomus RA22 (Draft1)   |
| P73_1104 | binding-protein-dependent transport system inner membrane protein      | Ochrobactrum intermedium J2                  |
| P73_1105 | extracellular solute-binding protein                                   | Aurantimonas ureilytica DSM 18598            |
| P73_1108 | short chain dehydrogenase                                              | Burkholderia gladioli BSR3                   |
| P73_1109 | LysR family transcriptional regulator                                  | Thalassobaculum salexigens DSM 19539         |
| P73_1110 | HxlR family transcriptional regulator                                  | Methylobacterium nodulans ORS 2060           |
| P73_1111 | NADP oxidoreductase coenzyme F420-dependent                            | Glaciibacter superstes DSM 21135             |
| P73_1112 | alcohol dehydrogenase zinc-binding domain-containing protein           | delta proteobacterium NaphS2                 |
| P73_1116 | TetR family transcriptional regulator                                  | Bradyrhizobium sp. ARR65                     |
| P73_1117 | short-chain dehydrogenase/reductase SDR                                | Terriglobus saanensis SP1PR4, DSM 23119      |
| P73_1123 | transporter                                                            | Yaniella halotolerans DSM 15476              |
| P73_1133 | Peroxiredoxin                                                          | Phyllobacterium sp. YR531                    |
| P73_1146 | glutathione S-transferase                                              | Nitratireductor indicus C115                 |
| P73_1288 | hypothetical protein                                                   | Synechococcus elongatus PCC 7942             |
| P73_1289 | hypothetical protein                                                   | Desulfovibrio inopinatus DSM                 |

|          |                                                                      |                                                      |
|----------|----------------------------------------------------------------------|------------------------------------------------------|
|          |                                                                      | 10711                                                |
| P73_1296 | major facilitator superfamily protein                                | <i>Stenotrophomonas maltophilia</i> K279a            |
| P73_1297 | transcriptional regulator                                            | <i>Amorphus coralli</i> DSM 19760                    |
| P73_1332 | BLUF domain-containing protein                                       | <i>Microbacterium paraoxydans</i> 77MFTsu3.2         |
| P73_1364 | ribose ABC transporter periplasmic binding protein                   | <i>Rhodospirillum rubrum</i> S1, ATCC 11170          |
| P73_1365 | ABC transporter                                                      | <i>Opitutaceae</i> sp. TAV5                          |
| P73_1366 | ribose ABC transporter permease                                      | <i>Pleomorphomonas oryzae</i> DSM 16300              |
| P73_1367 | lactoylglutathione lyase-like protein                                | <i>Haloterrigena turkmenica</i> VKM B-1734, DSM 5511 |
| P73_1369 | binding-protein-dependent transport systems inner membrane component | <i>Mesorhizobium ciceri</i> CMG6                     |
| P73_1370 | ABC transporter permease                                             | <i>Mesorhizobium ciceri</i> CMG6                     |
| P73_1371 | ABC transporter substrate binding protein                            | <i>Inquilingus limosus</i> DSM 16000                 |
| P73_1375 | transcriptional regulator                                            | <i>Burkholderia thailandensis</i> MSMB43             |
| P73_1378 | TRAP transporter solute receptor subunit DctP family protein 7       | <i>Acidovorax</i> sp. JHL-9                          |
| P73_1381 | acetaldehyde dehydrogenase                                           | <i>Marinobacter daepoensis</i> DSM 16072             |
| P73_1390 | urocanate hydratase                                                  | <i>Rhizobium leguminosarum</i> bv. trifolii WSM1325  |
| P73_1392 | tripartite ATP-independent periplasmic transporter DctQ              | <i>Tistrella mobilis</i> KA081020-065                |
| P73_1394 | CoA-transferase                                                      | <i>Achromobacter xylosoxidans</i> A8                 |
| P73_1395 | acyl-CoA dehydrogenase                                               | <i>Achromobacter xylosoxidans</i> A8                 |
| P73_1396 | short-chain specific acyl-CoA dehydrogenase                          | <i>Roseomonas cervicalis</i> ATCC 49957              |
| P73_1399 | SNF2-related:helicase, C-terminal:type III restriction enzyme        | <i>Syntrophus aciditrophicus</i> SB                  |
| P73_1400 | glutathione S-transferase                                            | <i>Bradyrhizobium elkanii</i> WSM1741                |
| P73_1401 | Uncharacterized protein conserved in bacteria                        | <i>Tistrella mobilis</i> KA081020-065                |
| P73_1404 | Uncharacterized conserved protein                                    | <i>Thiobacillus denitrificans</i> DSM 12475          |
| P73_1406 | Transcriptional regulator                                            | <i>Tistrella mobilis</i> KA081020-065                |
| P73_1408 | HlyD family secretion protein                                        | <i>Microvirga lupini</i> Lut6                        |
| P73_1422 | hypothetical protein                                                 | <i>Azospirillum irakense</i> DSM 11586               |
| P73_1430 | Bifunctional DNA primase/polymerase, N-terminal                      | <i>Bradyrhizobium</i> sp. CCGE-LA001                 |
| P73_1431 | transcriptional regulator                                            | <i>Francisella</i> sp. TX077308                      |
| P73_1434 | alkanesulfonate monooxygenase                                        | <i>Pseudomonas</i> sp. M1                            |
| P73_1435 | Alkanesulfonate monooxygenase                                        | <i>Pseudomonas</i> sp. M1                            |

|          |                                                                                |                                             |
|----------|--------------------------------------------------------------------------------|---------------------------------------------|
| P73_1436 | ABC-type Fe <sup>3+</sup> transport system, substrate binding component        | <i>Pseudomonas</i> sp. M1                   |
| P73_1437 | spermidine/putrescine ABC transporter ATPase                                   | <i>Pseudomonas</i> sp. M1                   |
| P73_1438 | binding-protein-dependent transport system inner membrane protein              | <i>Pseudomonas</i> sp. M1                   |
| P73_1440 | ABC transporter-like protein                                                   | <i>Azospirillum</i> sp. B510                |
| P73_1441 | binding-protein-dependent transporter inner membrane component                 | <i>Halobacillus kuroshimensis</i> DSM 18393 |
| P73_1442 | aliphatic sulfonates family ABC transporter periplasmic ligand-binding protein | <i>Inquilinus limosus</i> DSM 16000         |
| P73_1595 | Predicted transcriptional regulators                                           | <i>Erythrobacter</i> sp. NAP1               |
| P73_1647 | mannonate dehydratase                                                          | <i>Actinopolymorpha alba</i> DSM 45243      |
| P73_1649 | mannonate dehydratase                                                          | <i>Ensifer fredii</i> USDA 257              |
| P73_1650 | GntR family transcriptional regulator                                          | <i>Agrobacterium vitis</i> S4               |
| P73_1652 | oligopeptide ABC transporter substrate binding protein                         | <i>Agrobacterium</i> sp. 224MFTsu3.1        |
| P73_1653 | dipeptide ABC transporter permease                                             | <i>Microvirga lotononidis</i> WSM3557       |
| P73_1654 | dipeptide ABC transporter                                                      | <i>Rhizobium rhizogenes</i> K84             |
| P73_1655 | peptide ABC transporter ATP-binding protein                                    | <i>Rhizobium etli</i> CIAT 652              |
| P73_1656 | ABC transporter                                                                | <i>Rhizobium etli</i> CIAT 894              |
| P73_1667 | L-lactate dehydrogenase (cytochrome) protein                                   | <i>Bradyrhizobium</i> sp. EC3.3             |
| P73_1753 | hypothetical protein                                                           | <i>Fodinicurvata sediminis</i> DSM 21159    |
| P73_1755 | conjugation TrbI family protein                                                | <i>Kaistia adipata</i> DSM 17808            |
| P73_1762 | conjugal transfer protein TrbB                                                 | <i>Pleomorphomonas koreensis</i> DSM 23070  |
| P73_1764 | P-type conjugative transfer ATPase TrbB                                        | <i>Kaistia adipata</i> DSM 17808            |
| P73_1766 | conjugal transfer coupling protein TraG                                        | <i>Kaistia adipata</i> DSM 17808            |
| P73_1767 | LysR family transcriptional regulator                                          | <i>Kaistia adipata</i> DSM 17808            |
| P73_1768 | TetR family transcriptional regulator                                          | <i>Microvirga lotononidis</i> WSM3557       |
| P73_1769 | multidrug resistance protein A                                                 | <i>Ensifer fredii</i> USDA 257              |
| P73_1770 | major facilitator transporter                                                  | <i>Ensifer fredii</i> USDA 257              |
| P73_1774 | dihydropteroic synthetase                                                      | <i>Escherichia coli</i> MS 124-1            |
| P73_1775 | Type IV secretory pathway, VirD2 components (relaxase)                         | <i>Oligotropha carboxidovorans</i> OM4      |
| P73_1776 | putative transglycosylase                                                      | <i>Meganema perideroedes</i> DSM 15528      |
| P73_1777 | Uncharacterized conserved protein                                              | <i>Bradyrhizobium japonicum</i> in8p8       |
| P73_1778 | TraF peptidase. serine peptidase MEROPS family S26C                            | <i>Kaistia adipata</i> DSM 17808            |
| P73_1782 | replication initiator protein A                                                | <i>Rhodopseudomonas palustris</i> DX-1      |
| P73_1787 | Uncharacterized conserved protein (DUF2285)                                    | <i>Kaistia adipata</i> DSM 17808            |
| P73_1788 | hypothetical protein                                                           | <i>Pleomorphomonas koreensis</i> DSM 23070  |

|          |                                                                           |                                             |
|----------|---------------------------------------------------------------------------|---------------------------------------------|
| P73_1789 | hypothetical protein                                                      | Oligotropha carboxidovorans OM4             |
| P73_1790 | Uncharacterized conserved protein                                         | Oligotropha carboxidovorans OM4             |
| P73_1791 | PilT domain-containing protein                                            | Rhizobium tropici USDA 9039                 |
| P73_1792 | Plasmid stability protein                                                 | Rhizobium tropici USDA 9039                 |
| P73_1793 | hypothetical protein                                                      | Oligotropha carboxidovorans OM4             |
| P73_1794 | ParB-like domain protein                                                  | Oligotropha carboxidovorans OM4             |
| P73_1796 | type I restriction-modification system M subunit                          | Comamonas composti DSM 21721                |
| P73_1797 | restriction modification system DNA specificity domain-containing protein | Thiocapsa marina 5811, DSM 5653             |
| P73_1798 | SMC protein, N-terminal domain-containing protein                         | Rhizobium etli GR56                         |
| P73_1799 | hypothetical protein                                                      | Rhizobium leguminosarum bv. trifolii WSM597 |
| P73_1805 | Predicted Zn peptidase                                                    | Sinobacter flavus DSM 18980                 |
| P73_1806 | helix-hairpin-helix DNA-binding motif-containing protein                  | Aurantimonas manganoxydans SI85-9A1         |
| P73_1807 | Uncharacterized protein conserved in bacteria (DUF2188)                   | Nitrobacter sp. Nb-311A                     |
| P73_1808 | hypothetical protein                                                      | Nitrobacter winogradskyi Nb-255             |
| P73_1809 | hypothetical protein                                                      | Nitrobacter winogradskyi Nb-255             |
| P73_1811 | Domain of unknown function (DUF4095)                                      | Chamaesiphon minutus PCC 6605               |
| P73_1853 | serine/threonine protein kinase                                           | Syntrophobacter fumaroxidans MPOB           |
| P73_1860 | Uncharacterized conserved protein (DUF2285)                               | Kaistia adipata DSM 17808                   |
| P73_1861 | hypothetical protein                                                      | Pleomorphomonas koreensis DSM 23070         |
| P73_1862 | hypothetical protein                                                      | Oligotropha carboxidovorans OM4             |
| P73_1863 | Uncharacterized conserved protein                                         | Oligotropha carboxidovorans OM4             |
| P73_1864 | PilT domain-containing protein                                            | Rhizobium tropici USDA 9039                 |
| P73_1865 | Plasmid stability protein                                                 | Rhizobium tropici USDA 9039                 |
| P73_1866 | hypothetical protein                                                      | Oligotropha carboxidovorans OM4             |
| P73_1867 | ParB-like domain protein                                                  | Oligotropha carboxidovorans OM4             |
| P73_1869 | type I restriction-modification system M subunit                          | Comamonas composti DSM 21721                |
| P73_1870 | restriction modification system DNA specificity domain-containing protein | Thiocapsa marina 5811, DSM 5653             |
| P73_1871 | SMC protein, N-terminal domain-containing protein                         | Rhizobium etli GR56                         |
| P73_1872 | hypothetical protein                                                      | Rhizobium leguminosarum bv. trifolii WSM597 |
| P73_1878 | Predicted Zn peptidase                                                    | Sinobacter flavus DSM 18980                 |
| P73_1879 | helix-hairpin-helix DNA-binding motif-containing protein                  | Aurantimonas manganoxydans SI85-9A1         |
| P73_1880 | Uncharacterized protein conserved in bacteria (DUF2188)                   | Nitrobacter sp. Nb-311A                     |
| P73_1881 | hypothetical protein                                                      | Nitrobacter winogradskyi Nb-255             |
| P73_1882 | hypothetical protein                                                      | Nitrobacter winogradskyi Nb-255             |
| P73_1884 | Domain of unknown function (DUF4095)                                      | Chamaesiphon minutus PCC 6605               |

|          |                                                                   |                                                   |
|----------|-------------------------------------------------------------------|---------------------------------------------------|
| P73_1926 | serine/threonine protein kinase                                   | Syntrophobacter fumaroxidans<br>MPOB              |
| P73_1935 | heavy metal translocating P-type ATPase                           | Chelativorans sp. BNC1                            |
| P73_1938 | MerR family transcriptional regulator                             | Mesorhizobium alhagi<br>CCNWXJ12-2                |
| P73_1940 | type 12 methyltransferase                                         | Rhizobium sp. PDO1-076                            |
| P73_1941 | hypothetical protein                                              | Mesorhizobium alhagi<br>CCNWXJ12-2                |
| P73_1943 | Inosine/uridine-preferring nucleoside hydrolase                   | Kaistia adipata DSM 17808                         |
| P73_1944 | RpiR family transcriptional regulator                             | Rhizobium sp. CF142                               |
| P73_1945 | twin-arginine translocation pathway signal                        | Rhizobium sp. CF142                               |
| P73_1946 | twin-arginine translocation pathway signal                        | Rhizobium sp. CF142                               |
| P73_1947 | S-adenosylhomocysteine deaminase, methylthioadenosine deaminase   | Rhizobium sp. CF142                               |
| P73_1949 | nitrate/sulfonate/bicarbonate ABC transporter permease            | Rhizobium sp. CF142                               |
| P73_1950 | ABC transporter-like protein permease                             | Rhizobium sp. CF142                               |
| P73_1951 | nucleoside 2-deoxyribosyltransferase                              | Rhizobium leguminosarum bv.<br>trifolii WSM1325   |
| P73_1958 | (2Fe-2S)-binding domain-containing protein                        | Burkholderia ubonensis Bu                         |
| P73_1963 | hypothetical protein                                              | Rhizobium sullae WSM1592                          |
| P73_1975 | putative monooxygenase                                            | Pseudomonas thermotolerans J53                    |
| P73_1976 | N-carbamoylsarcosine amidase                                      | Delftia sp. Cs1-4                                 |
| P73_1977 | polysaccharide deacetylase                                        | Pseudonocardia asaccharolytica<br>DSM 44247       |
| P73_1978 | helix-turn-helix domain-containing protein                        | Aneurinibacillus terranovensis<br>DSM 18919       |
| P73_1979 | transposase                                                       | Rhodopseudomonas palustris<br>TIE-1               |
| P73_1980 | transposase                                                       | Bradyrhizobium sp. BTAi1                          |
| P73_1981 | Uncharacterized conserved protein                                 | Caldimonas manganoxidans ATCC<br>BAA-369          |
| P73_1982 | activator of Hsp90 ATPase 1 family protein                        | Inquilingus limosus DSM 16000                     |
| P73_1983 | arsR family transcriptional regulator                             | Amycolatopsis nigrescens<br>CSC17Ta-90, DSM 44992 |
| P73_1991 | cupin 2 barrel domain-containing protein                          | Nitratireductor pacificus pht-3B                  |
| P73_1993 | GMC oxidoreductase                                                | Novosphingobium sp. AP12                          |
| P73_1994 | LysR family transcriptional regulator                             | Chelativorans sp. BNC1                            |
| P73_1995 | putative luciferase-like monooxygenase                            | Sphingobium sp. AP49                              |
| P73_1996 | monooxygenase                                                     | Sorangium cellulosum So ce 56                     |
| P73_1998 | binding-protein-dependent transport system inner membrane protein | Chelativorans sp. BNC1                            |
| P73_1999 | extracellular solute-binding protein                              | Chelativorans sp. BNC1                            |
| P73_2000 | major facilitator superfamily transporter                         | Amorphus coralli DSM 19760                        |

|          |                                                                   |                                           |
|----------|-------------------------------------------------------------------|-------------------------------------------|
| P73_2001 | ABC transporter nucleotide binding/ATPase protein                 | Agrobacterium sp. ATCC 31749              |
| P73_2002 | Uncharacterized protein involved in propionate catabolism         | Nitratireductor indicus C115              |
| P73_2004 | NADPH-dependent FMN reductase                                     | Rhizobium sp. CF142                       |
| P73_2005 | flavin-dependent reductase                                        | Pseudomonas syringae CC1557 (CC1557)      |
| P73_2006 | XRE family transcriptional regulator                              | Beijerinckia indica indica ATCC 9039      |
| P73_2007 | biotin sulfoxide reductase                                        | Nitratireductor indicus C115              |
| P73_2008 | LysR family transcriptional regulator                             | Burkholderia dolosa AUO158                |
| P73_2011 | CoA-binding protein                                               | Jonquetella anthropi E3_33 E1             |
| P73_2013 | Uncharacterized protein conserved in bacteria                     | Variovorax paradoxus 4MFCo3.1             |
| P73_2018 | Uncharacterized protein conserved in bacteria                     | Cupriavidus necator N-1, ATCC 43291       |
| P73_2019 | transcriptional regulator                                         | Rhizobium rhizogenes K84                  |
| P73_2020 | 6-phosphogluconate dehydrogenase                                  | Rhizobium rhizogenes K84                  |
| P73_2021 | 2-hydroxyhepta-2,4-diene-1,7-dioate isomerase                     | Rhizobium rhizogenes K84                  |
| P73_2022 | bleomycin resistance protein                                      | Rhizobium rhizogenes K84                  |
| P73_2023 | Alpha/beta hydrolase family                                       | Acidothermus cellulolyticus 11B           |
| P73_2024 | alpha/beta hydrolase fold protein                                 | Arthrobacter sp. 161MFSHa2.1              |
| P73_2025 | ABC transporter                                                   | Agromyces subbeticus DSM 16689            |
| P73_2026 | binding-protein-dependent transport system inner membrane protein | Actinomadura flavalba DSM 45200           |
| P73_2027 | iron(III) ABC transporter iron (III)-binding protein              | Actinomadura flavalba DSM 45200           |
| P73_2028 | HTH-type transcriptional activator nahR                           | Bradyrhizobium sp. WSM3983                |
| P73_2029 | LysR family transcriptional regulator                             | Magnetospirillum magnetotacticum MS-1     |
| P73_2030 | putative oxidoreductase protein                                   | Streptomyces sp. CNY228                   |
| P73_2031 | 2OG-Fe(II) oxygenase                                              | Bradyrhizobium elkanii WSM2783            |
| P73_2032 | cytosine deaminase-like protein                                   | Methylobacterium chloromethanicum CM4     |
| P73_2033 | taurine catabolism dioxygenase TauD/TfdA                          | Caulobacter segnis ATCC 21756             |
| P73_2034 | NMT1/THI5-like domain-containing protein                          | Elioraea tepidiphila DSM 17972            |
| P73_2035 | aliphatic sulfonates transporter ATP-binding protein SsuB         | Elioraea tepidiphila DSM 17972            |
| P73_2036 | ABC transporter permease                                          | Alcaligenes faecalis phenolicus DSM 16503 |
| P73_2040 | replicative DNA helicase                                          | Ensifer arboris LMG 14919                 |
| P73_2042 | hypothetical protein                                              | Cupriavidus sp. UYPR2.512                 |
| P73_2046 | LysR family transcriptional regulator                             | Azospirillum halopraeferens DSM 3675      |
| P73_2048 | ABC transporter                                                   | Massilia niastensis DSM 21313             |
| P73_2049 | binding-protein-dependent transport system inner                  | Ottowia thiooxydans DSM 14619             |

|          |                                                                       |                                                          |
|----------|-----------------------------------------------------------------------|----------------------------------------------------------|
|          | membrane protein                                                      |                                                          |
| P73_2050 | TRAP dicarboxylate transporter subunit DctP                           | Halomonas halocynthiae DSM 14573                         |
| P73_2051 | TRAP-type C4-dicarboxylate transport system, small permease component | Bordetella parapertussis 12822                           |
| P73_2052 | TRAP dicarboxylate transporter subunit DctM                           | Polaromonas sp. JS666                                    |
| P73_2053 | aldo/keto reductase                                                   | Micromonospora carbonacea var. africana. ATCC 39149      |
| P73_2054 | 3-oxoacyl-ACP reductase                                               | Candidatus Poribacteria sp. WGA-A3 (final_clean_version) |
| P73_2055 | polar amino acid ABC transporter inner membrane subunit               | Inquilingus limosus DSM 16000                            |
| P73_2056 | polar amino acid ABC transporter inner membrane subunit               | Pantoea sp. GM01                                         |
| P73_2057 | ABC transporter                                                       | Methylobacterium sp. 4-46                                |
| P73_2058 | extracellular solute-binding protein                                  | Starkeya novella DSM 506                                 |
| P73_2059 | SMP-30/gluconolactonase/LRE domain-containing protein                 | Roseomonas cervicalis ATCC 49957                         |
| P73_2060 | LysR family transcriptional regulator                                 | Rhodovibrio salinarum DSM 9154                           |
| P73_2061 | putative glyoxalase                                                   | Geopsychrobacter electrophilus DSM 16401                 |
| P73_2062 | acetolactate synthase, large chain related protein                    | Streptomyces violaceoruber 3844-33C                      |
| P73_2063 | amidohydrolase                                                        | Rubritepida flocculans DSM 14296                         |
| P73_2064 | flavoprotein                                                          | Halalkalicoccus jeotgali B3, DSM 18796                   |
| P73_2066 | polysaccharide deacetylase                                            | Granulicella tundricola MP5ACTX9                         |
| P73_2067 | thiamine pyrophosphate central domain-containing protein              | Streptomyces violaceusniger Tu 4113                      |
| P73_2068 | glucose-methanol-choline oxidoreductase                               | Methylobacterium nodulans ORS 2060                       |
| P73_2069 | short-chain aldo-keto oxidoreductase                                  | Pleomorphomonas koreensis DSM 23070                      |
| P73_2071 | TRAP transport system, small permease protein                         | Bradyrhizobium canariense WSM4349                        |
| P73_2072 | TRAP transporter, DctM subunit                                        | Bradyrhizobium elkanii USDA 3254                         |
| P73_2073 | transcription regulator MarR family protein                           | Cupriavidus necator N-1, ATCC 43291                      |
| P73_2079 | aliphatic sulfonate ABC transporter permease                          | Phyllobacterium sp. YR531                                |
| P73_2082 | taurine transport system permease                                     | Mesorhizobium loti CJ3sym                                |
| P73_2083 | taurine transporter ATP-binding subunit                               | Meganema perideroedes DSM 15528                          |



|          |                                                                                |                                            |
|----------|--------------------------------------------------------------------------------|--------------------------------------------|
| P73_2084 | taurine ABC transporter periplasmic binding protein                            | Meganema perideroedes DSM 15528            |
| P73_2086 | hypothetical protein                                                           | Streptomyces bingchenggensis BCW-1         |
| P73_2087 | Uncharacterized protein conserved in bacteria                                  | Inquilinus limosus DSM 16000               |
| P73_2089 | TRAP dicarboxylate transporter subunit DctM                                    | Verminephrobacter eiseniae EF01-2          |
| P73_2091 | AraC family transcriptional regulator                                          | Bradyrhizobium elkanii WSM2783             |
| P73_2092 | regulatory protein LuxR                                                        | Inquilinus limosus DSM 16000               |
| P73_2095 | carbon monoxide dehydrogenase                                                  | Elioraea tepidiphila DSM 17972             |
| P73_2096 | TRAP dicarboxylate transporter subunit DctM                                    | Martelevella mediterranea DSM 17316        |
| P73_2097 | TRAP dicarboxylate transporter subunit DctQ                                    | Martelevella mediterranea DSM 17316        |
| P73_2098 | putative periplasmic substrate binding protein                                 | Martelevella mediterranea DSM 17316        |
| P73_2100 | UDP-glucose 4-epimerase                                                        | Pseudonocardia dioxanivorans CB1190        |
| P73_2101 | Predicted metal-dependent enzyme of the double-stranded beta helix superfamily | Bacillus panaciterrae DSM 19096            |
| P73_2112 | TRAP transporter-DctP subunit                                                  | Nitratireductor indicus C115               |
| P73_2116 | alkyl hydroperoxide reductase/ thiol specific antioxidant/ Mal allergen        | Mesorhizobium ciceri bv biserrulae WSM1271 |
| P73_2118 | ferredoxin                                                                     | Mesorhizobium australicum WSM2073          |
| P73_2119 | ABC-type nitrate/sulfonate/bicarbonate transport system, ATPase component      | Rhizobium sp. 2MFCo13.1                    |
| P73_2120 | ABC transporter permease                                                       | Ensifer meliloti Mlalz-1                   |
| P73_2121 | aliphatic sulfonates ABC transporter substrate-binding protein                 | Ensifer meliloti SM11                      |
| P73_2122 | drug resistance transporter, EmrB/QacA subfamily protein                       | Rhizobium sullae WSM1592                   |
| P73_2132 | Glutathione S-transferase domain protein                                       | Gluconacetobacter sp. SXCC-1               |
| P73_2133 | adenosine deaminase                                                            | Gluconacetobacter sp. SXCC-1               |
| P73_2135 | NitT/TauT family transport system ATP-binding protein                          | Gluconacetobacter sp. SXCC-1               |
| P73_2136 | NitT/TauT family transport system permease protein                             | Gluconacetobacter sp. SXCC-1               |
| P73_2137 | 2OG-Fe(II) oxygenase                                                           | Gluconacetobacter sp. SXCC-1               |
| P73_2138 | transcriptional regulator, LacI family protein                                 | Gluconacetobacter sp. SXCC-1               |
| P73_2144 | LysR family transcriptional regulator                                          | Martelevella mediterranea DSM 17316        |
| P73_2145 | 2OG-Fe(II) oxygenase                                                           | Methylobacterium populi BJ001              |
| P73_2146 | NMT1/THI5-like domain-containing protein                                       | Pseudomonas azotifigens DSM 17556          |
| P73_2150 | aromatic hydrocarbon dioxygenase small subunit                                 | Nocardioides sp. Iso805N                   |

|          |                                                                    |                                             |
|----------|--------------------------------------------------------------------|---------------------------------------------|
| P73_2151 | Rieske (2Fe-2S) domain-containing protein                          | Nocardioides sp. JS614                      |
| P73_2152 | Predicted ester cyclase                                            | Cryptosporangium arvum YU 629-21, DSM 44712 |
| P73_2153 | Phytanoyl-CoA dioxygenase (PhyH)                                   | Conexibacter woesei Iso977N                 |
| P73_2213 | Lysophospholipase                                                  | Laribacter hongkongensis HLHK9              |
| P73_2260 | transposase                                                        | Rhodopseudomonas palustris TIE-1            |
| P73_2261 | transposase                                                        | Bradyrhizobium sp. BTAi1                    |
| P73_2264 | ParB-like domain protein                                           | Oligotropha carboxidovorans OM4             |
| P73_2265 | hypothetical protein                                               | Oligotropha carboxidovorans OM4             |
| P73_2267 | Acetyltransferase (GNAT) domain                                    | Rhodopseudomonas palustris DX-1             |
| P73_2268 | Uncharacterized protein conserved in bacteria                      | Beijerinckia indica indica ATCC 9039        |
| P73_2269 | Uncharacterized conserved protein                                  | Agrobacterium sp. 224MFTsu3.1               |
| P73_2270 | hypothetical protein                                               | Oligotropha carboxidovorans OM4             |
| P73_2271 | hypothetical protein                                               | Pleomorphomonas koreensis DSM 23070         |
| P73_2272 | Uncharacterized conserved protein (DUF2285)                        | Kaistia adipata DSM 17808                   |
| P73_2275 | replication initiator protein A                                    | Rhodopseudomonas palustris DX-1             |
| P73_2279 | TraF peptidase. serine peptidase MEROPS family S26C                | Kaistia adipata DSM 17808                   |
| P73_2280 | Uncharacterized conserved protein                                  | Bradyrhizobium japonicum in8p8              |
| P73_2281 | putative transglycosylase                                          | Meganema perideroedes DSM 15528             |
| P73_2282 | Type IV secretory pathway, VirD2 components (relaxase)             | Oligotropha carboxidovorans OM4             |
| P73_2283 | TetR family transcriptional regulator                              | Rhizobium sp. CF142                         |
| P73_2284 | Sterol-4-alpha-carboxylate 3-dehydrogenase, decarboxylating        | Caulobacter sp. K31                         |
| P73_2285 | LysR family transcriptional regulator                              | Brevundimonas naejangsanensis DSM 23858     |
| P73_2286 | conjugal transfer coupling protein TraG                            | Brevundimonas naejangsanensis DSM 23858     |
| P73_2288 | P-type conjugative transfer ATPase TrbB                            | Rhodopseudomonas palustris DX-1             |
| P73_2291 | conjugal transfer ATPase TrbE                                      | Kaistia adipata DSM 17808                   |
| P73_2292 | conjugal transfer protein TrbJ                                     | Hoeflea sp. 108                             |
| P73_2297 | conjugation TrbI family protein                                    | Hoeflea sp. 108                             |
| P73_2298 | Uncharacterized conserved small protein                            | Kaistia adipata DSM 17808                   |
| P73_2300 | glucose/ribitol short chain dehydrogenase/reductase family protein | Alcanivorax dieselolei B5                   |
| P73_2322 | Nitroreductase                                                     | Kaistia adipata DSM 17808                   |
| P73_2323 | Asp/Glu racemase                                                   | Agrobacterium tumefaciens                   |

|          |                                                                   |                                           |
|----------|-------------------------------------------------------------------|-------------------------------------------|
|          |                                                                   | CCNWGS0286                                |
| P73_2324 | ABC transporter permease                                          | Rhizobium leguminosarum bv viciae WSM1455 |
| P73_2325 | ABC transporter permease                                          | Rhizobium leguminosarum bv viciae WSM1455 |
| P73_2327 | ABC transporter ATP-binding protein                               | Agrobacterium tumefaciens<br>CCNWGS0286   |
| P73_2328 | Hydantoinase                                                      | Agrobacterium tumefaciens<br>CCNWGS0286   |
| P73_2329 | Uncharacterized conserved protein                                 | Agrobacterium tumefaciens<br>CCNWGS0286   |
| P73_2330 | Uncharacterized conserved protein                                 | Kaistia adipata DSM 17808                 |
| P73_2331 | transcriptional regulator, LuxR family protein                    | Kaistia adipata DSM 17808                 |
| P73_2332 | xenobiotic compound monooxygenase A subunit                       | Chelativorans sp. BNC1                    |
| P73_2333 | LuxR family transcriptional regulator                             | Chelativorans sp. BNC1                    |
| P73_2334 | hydantoinase A                                                    | Bradyrhizobium sp. BTAi1                  |
| P73_2335 | Uncharacterized conserved protein                                 | Rhizobium leguminosarum bv. viciae Vh3    |
| P73_2336 | twin-arginine translocation pathway signal                        | Chelativorans sp. BNC1                    |
| P73_2337 | binding-protein-dependent transport system inner membrane protein | Chelativorans sp. BNC1                    |
| P73_2338 | binding-protein-dependent transport system inner membrane protein | Chelativorans sp. BNC1                    |
| P73_2339 | oligopeptide/dipeptide ABC transporter ATPase                     | Chelativorans sp. BNC1                    |
| P73_2340 | oligopeptide/dipeptide ABC transporter ATPase                     | Chelativorans sp. BNC1                    |
| P73_2360 | ThiJ/PfpI family protein                                          | Brucella sp. 83/13                        |
| P73_2361 | MerR family regulatory protein                                    | Phyllobacterium sp. YR531                 |
| P73_2362 | NADH:flavin oxidoreductase                                        | Brucella sp. BO2                          |
| P73_2363 | Acetoacetate decarboxylase (ADC)                                  | Acetobacter aceti ATCC 23746              |
| P73_2364 | alpha/beta hydrolase                                              | Brevundimonas diminuta ATCC 11568         |
| P73_2366 | aldehyde dehydrogenase                                            | Burkholderia cepacia UCB 717, ATCC 25416  |
| P73_2367 | D-3-phosphoglycerate dehydrogenase, NAD-binding protein           | Ensifer medicae WSM1369                   |
| P73_2368 | transcriptional regulator                                         | Bradyrhizobium elkanii WSM2783            |
| P73_2369 | short chain dehydrogenase/reductase oxidoreductase                | Novosphingobium aromaticivorans DSM 12444 |
| P73_2370 | 2,5-dichloro-2,5-cyclohexadiene-1,4-diol dehydrogenase            | Methanosarcina barkeri Fusaro, DSM 804    |
| P73_2371 | alcohol dehydrogenase zinc-binding domain-containing protein      | delta proteobacterium NaphS2              |
| P73_2378 | TetR family transcriptional regulator                             | Xanthobacter sp. 126                      |

|          |                                                                                                     |                                                    |
|----------|-----------------------------------------------------------------------------------------------------|----------------------------------------------------|
| P73_2379 | putative sulfate ester transport system substrate-binding protein                                   | Azospirillum brasilense Sp245                      |
| P73_2380 | binding-protein-dependent transport system inner membrane protein                                   | Beijerinckia indica indica ATCC 9039               |
| P73_2381 | putative alkanesulfonate transport protein, ABC superfamily, inner membrane component               | Azospirillum brasilense Sp245                      |
| P73_2382 | ABC transporter                                                                                     | Pseudomonas fluorescens A506                       |
| P73_2383 | NADH-quinone oxidoreductase subunits H/I                                                            | Actinoplanes sp. SE50/110                          |
| P73_2401 | phosphoribosyltransferase                                                                           | Bradyrhizobium elkanii WSM1741                     |
| P73_2403 | PEBP family protein                                                                                 | Tistrella mobilis KA081020-065                     |
| P73_2405 | xanthine dehydrogenase molybdopterin binding subunit                                                | Pelagibacterium halotolerans B2                    |
| P73_2406 | sulfonate/nitrate transport system substrate-binding protein                                        | Rhizobium sp. CF142                                |
| P73_2408 | Transcriptional regulator                                                                           | Pleomorphomonas koreensis DSM 23070                |
| P73_2414 | FMN-dependent oxidoreductase, nitrilotriacetate monooxygenase family                                | Agrobacterium sp. 224MFTsu3.1                      |
| P73_2420 | ribose ABC transporter permease                                                                     | Kaistia adipata DSM 17808                          |
| P73_2421 | LacI family transcriptional regulator                                                               | Kaistia adipata DSM 17808                          |
| P73_2424 | hypothetical protein                                                                                | Candidatus Accumulibacter phosphatis Type IIA UW-1 |
| P73_2426 | gluconate 2-dehydrogenase (acceptor)                                                                | Nitratireductor indicus C115                       |
| P73_2427 | Gluconate 2-dehydrogenase subunit 3                                                                 | Nitratireductor indicus C115                       |
| P73_2439 | UDP-N-acetylmuramyl pentapeptide phosphotransferase/UDP-N-acetylglucosamine-1-phosphate transferase | Martelevella mediterranea DSM 17316                |
| P73_2444 | glycosyl transferase family protein                                                                 | Desulfovibrio alaskensis DSM 16109                 |
| P73_2447 | polysaccharide biosynthesis protein                                                                 | Bacillus chagannorensis DSM 18086                  |
| P73_2450 | transposase                                                                                         | Asticcacaulis benevestitus DSM 16100               |
| P73_2454 | RelE/StbE family addiction module toxin                                                             | Acidithiobacillus ferrivorans SS3                  |
| P73_2510 | Predicted phosphohydrolases                                                                         | Methylobacterium extorquens AM1                    |
| P73_2646 | exported xanthine dehydrogenase/CoxI family protein                                                 | Martelevella mediterranea DSM 17316                |
| P73_2742 | heat shock protein HtpX                                                                             | Aestuariatibacter salexigens DSM 15300             |
| P73_2743 | TrkA-C domain protein                                                                               | Salinimicrobium xinjiangense DSM 19287             |
| P73_2771 | putative ATPase                                                                                     | Sphingobium sp. SYK-6                              |
| P73_2772 | peptidase S8 family protein                                                                         | Sphingobium sp. SYK-6                              |
| P73_2809 | Glycine/D-amino acid oxidases (deaminating)                                                         | Microvirga lupini Lut6                             |

|          |                                                                      |                                       |             |
|----------|----------------------------------------------------------------------|---------------------------------------|-------------|
| P73_2810 | N-methylhydantoinase B/acetone carboxylase subunit alpha             | Azorhizobium<br>UFLA1-100             | doebereinae |
| P73_2811 | 5-oxoprolinase                                                       | Azorhizobium<br>UFLA1-100             | doebereinae |
| P73_2812 | LysR family transcription regulator protein                          | Burkholderia thailandensis Bt4        |             |
| P73_2813 | oligopeptide/dipeptide ABC transporter, ATPase subunit               | Azorhizobium<br>UFLA1-100             | doebereinae |
| P73_2814 | oligopeptide/dipeptide ABC transporter ATP-binding protein           | Azorhizobium<br>UFLA1-100             | doebereinae |
| P73_2815 | agropinic acid ABC transporter permease                              | Azorhizobium<br>UFLA1-100             | doebereinae |
| P73_2816 | peptide ABC transporter                                              | Azorhizobium<br>UFLA1-100             | doebereinae |
| P73_2817 | LysR family transcriptional regulator                                | Azorhizobium<br>UFLA1-100             | doebereinae |
| P73_2818 | D-isomer specific 2-hydroxyacid dehydrogenase                        | Azorhizobium<br>UFLA1-100             | doebereinae |
| P73_2819 | mandelate racemase/muconate lactonizing protein                      | Elioraea tepidiphila DSM 17972        |             |
| P73_2820 | LecH                                                                 | Polaromonas sp. JS666                 |             |
| P73_2822 | putative sarcosine oxidase subunit alpha                             | Acidovorax delafieldii 2AN            |             |
| P73_2829 | N-carbamoylsarcosine amidase                                         | Marteella mediterranea DSM 17316      |             |
| P73_2830 | transcriptional regulator                                            | Marteella mediterranea DSM 17316      |             |
| P73_2831 | exported protein (TRAP-type transport system, periplasmic component) | Bordetella petrii Se-1111R, DSM 12804 |             |
| P73_2834 | arylmalonate decarboxylase                                           | Tistrella mobilis KA081020-065        |             |
| P73_2835 | Domain of unknown function (DUF4392)                                 | Fervidicoccus fontis Kam940           |             |
| P73_2836 | C4-dicarboxylate-binding periplasmic protein                         | Tistrella mobilis KA081020-065        |             |
| P73_2837 | putative DctQ (C4-dicarboxylate permease, small subunit)             | Tistrella mobilis KA081020-065        |             |
| P73_2838 | Putative TRAP transporter large permease protein                     | Tistrella mobilis KA081020-065        |             |
| P73_2840 | hydantoinase B                                                       | Bordetella bronchiseptica RB50        |             |
| P73_2842 | LysR family transcriptional regulator                                | Rhodopseudomonas CGA009               | palustris   |
| P73_2864 | short-chain dehydrogenase/reductase sDR                              | Rhizobium sp. CF142                   |             |
| P73_2865 | short-chain dehydrogenase                                            | Rhizobium sp. CF142                   |             |
| P73_2868 | GntR family transcriptional regulator                                | Rhizobium sp. CF142                   |             |
| P73_2869 | putative amidohydrolase                                              | Rhizobium sp. CF142                   |             |
| P73_2870 | putative ABC transporter substrate binding protein                   | Rhizobium sp. CF142                   |             |
| P73_2871 | short-chain dehydrogenase/reductase SDR                              | Rhizobium sp. CF142                   |             |
| P73_2872 | ABC transporter                                                      | Rhizobium sp. CF142                   |             |
| P73_2873 | binding-protein-dependent transporters inner membrane component      | Rhizobium sp. CF142                   |             |

|          |                                                                                        |                                                |
|----------|----------------------------------------------------------------------------------------|------------------------------------------------|
| P73_2874 | ferredoxin:oxidoreductase FAD/NAD(P)-binding subunit                                   | Rhizobium sp. CF142                            |
| P73_2875 | Rieske (2Fe-2S) domain-containing protein                                              | Rhizobium sp. CF142                            |
| P73_2876 | putative amidohydrolase                                                                | Rhizobium sp. CF142                            |
| P73_2877 | GntR family transcriptional regulator                                                  | Rhizobium sp. CF142                            |
| P73_2878 | NIPSNAP family protein                                                                 | Rhizobium sp. CF142                            |
| P73_2879 | endoribonuclease L-PSP                                                                 | Agrobacterium sp. ATCC 31749                   |
| P73_2884 | Class I triheme cytochrome c                                                           | Aurantimonas manganoxydans<br>SI85-9A1         |
| P73_2946 | Predicted Zn-dependent protease (DUF2268)                                              | Rhizobium sp. CF142                            |
| P73_2973 | arylmalonate decarboxylase                                                             | Azohydromonas australica DSM<br>1124           |
| P73_2974 | TRAP-type C4-dicarboxylate transport system, periplasmic component                     | Bordetella petrii Se-1111R, DSM<br>12804       |
| P73_2977 | hydantoinase B                                                                         | Herbaspirillum sp. YR522                       |
| P73_2981 | IcIR family transcriptional regulator                                                  | Cupriavidus basilensis OR16                    |
| P73_2982 | methanol/ethanol family PQQ-dependent dehydrogenase                                    | Pseudomonas mendocina NK-01                    |
| P73_2983 | Uncharacterized protein, possibly involved in utilization of glycolate and propanediol | Geodermatophilus obscurus G-20,<br>DSM 43160   |
| P73_2984 | bacilysin biosynthesis oxidoreductase BacC                                             | Hoeflea sp. 108                                |
| P73_3015 | cyclopropane-fatty-acyl-phospholipid synthase                                          | Ochrobactrum intermedium LMG<br>3301           |
| P73_3091 | flavonol synthase/dioxygenase                                                          | Agrobacterium vitis S4                         |
| P73_3100 | D-isomer specific 2-hydroxyacid dehydrogenase NAD-binding protein                      | Actinopolymorpha alba DSM<br>45243             |
| P73_3101 | 2-hydroxy-3-oxopropionate reductase                                                    | Martelella mediterranea DSM<br>17316           |
| P73_3102 | hydroxypyruvate isomerase                                                              | Rhizobium sp. CF142                            |
| P73_3104 | binding-protein-dependent transport system inner membrane protein                      | Rhizobium leguminosarum bv<br>trifolii WSM2297 |
| P73_3105 | family 5 extracellular solute-binding protein                                          | Truepera radiovictrix RQ-24, DSM<br>17093      |
| P73_3106 | Uncharacterized protein conserved in bacteria                                          | Actinopolymorpha alba DSM<br>45243             |
| P73_3107 | oligopeptide/dipeptide ABC transporter ATPase                                          | Truepera radiovictrix RQ-24, DSM<br>17093      |
| P73_3108 | oligopeptide/dipeptide ABC transporter ATPase                                          | Truepera radiovictrix RQ-24, DSM<br>17093      |
| P73_3109 | binding-protein-dependent transport systems inner membrane component                   | Rhizobium leguminosarum bv<br>viciae UPM1131   |
| P73_3110 | LacI family transcriptional regulator                                                  | Kaistia granuli DSM 23481                      |
| P73_3111 | aldo-keto reductase                                                                    | Rhizobium leguminosarum bv<br>trifolii WSM2297 |
| P73_3121 | putative hydrolase phosphatase protein                                                 | Kaistia granuli DSM 23481                      |

|          |                                                                   |                                              |
|----------|-------------------------------------------------------------------|----------------------------------------------|
| P73_3122 | RpiR family transcriptional regulator                             | Advenella kashmirensis WT001                 |
| P73_3123 | LacI family transcriptional regulator                             | Ensifer meliloti 4H41                        |
| P73_3125 | binding-protein-dependent transport system inner membrane protein | Rhizobium leguminosarum bv. trifolii WSM2304 |
| P73_3127 | ABC transporter-like protein                                      | Nitratireductor aquibiodomus RA22 (Draft1)   |
| P73_3131 | catalase                                                          | Methylobacterium populi BJ001                |
| P73_3132 | bacilysin biosynthesis oxidoreductase bacC                        | Marine gamma proteobacterium sp. HTCC2148    |
| P73_3133 | short-chain dehydrogenase/reductase SDR                           | Rhodopseudomonas palustris BisB5             |
| P73_3134 | ABC transporter substrate-binding protein                         | Oligotropha carboxidovorans OM4              |
| P73_3135 | 3-oxoacyl-ACP reductase                                           | Bradyrhizobium elkanii USDA 76               |
| P73_3136 | glutathione import ATP-binding protein GsiA                       | Oligotropha carboxidovorans OM4              |
| P73_3137 | peptide ABC transporter permease                                  | Oligotropha carboxidovorans OM4              |
| P73_3138 | glutathione transport system permease GsiD                        | Oligotropha carboxidovorans OM4              |
| P73_3139 | SnoaL-like domain                                                 | Tolumonas auensis TA 4, DSM 9187             |
| P73_3143 | polysaccharide deacetylase family protein                         | Thalassobaculum salexigens DSM 19539         |
| P73_3144 | amidase                                                           | Aurantimonas manganooxydans SI85-9A1         |
| P73_3145 | Transcriptional regulator                                         | Ensifer medicae WSM4191                      |
| P73_3147 | ABC transporter-like protein                                      | Bradyrhizobium sp. ARR65                     |
| P73_3148 | binding-protein-dependent transporter inner membrane component    | Bradyrhizobium elkanii WSM2783               |
| P73_3149 | Predicted flavoprotein involved in K <sup>+</sup> transport       | Plesiocystis pacifica SIR-1                  |
| P73_3150 | ring-opening amidohydrolase                                       | Azorhizobium doebereineriae UFLA1-100        |
| P73_3152 | Uncharacterized conserved protein                                 | Halomonas anticariensis DSM 16096            |
| P73_3161 | acyl-CoA hydrolase                                                | Agrobacterium sp. 224MFTsu3.1                |
| P73_3170 | transcriptional regulator                                         | Brucella ovis ATCC 25840                     |
| P73_3219 | transposase                                                       | Bradyrhizobium japonicum USDA 135            |
| P73_3240 | phage/plasmid primase, P4 family, C-terminal domain               | Ensifer sp. TW10                             |
| P73_3242 | Helix-turn-helix domain                                           | Marinobacter sp. ELB17                       |
| P73_3244 | integrase family protein                                          | Methylocaldum szegediense O-12               |
| P73_3257 | DNA methyltransferase                                             | Rhodococcus erythropolis PR4                 |
| P73_3258 | restriction enzyme                                                | Erwinia amylovora Ea273, ATCC 49946          |
| P73_3259 | McrBC 5-methylcytosine restriction system component               | Streptomyces sp. 351MFTsu5.1                 |
| P73_3272 | dienelactone hydrolase family protein                             | Pseudomonas sp. GM79                         |

|          |                                                                                    |                                      |
|----------|------------------------------------------------------------------------------------|--------------------------------------|
| P73_3333 | hypothetical protein                                                               | Pelagibacterium halotolerans B2      |
| P73_3335 | amine dehydrogenase                                                                | Azospirillum halopraeferens DSM 3675 |
| P73_3336 | methylamine utilization protein MauD                                               | Pelagibacterium halotolerans B2      |
| P73_3339 | transcriptional regulator                                                          | Pelagibacterium halotolerans B2      |
| P73_3380 | Predicted periplasmic or secreted lipoprotein                                      | Mesorhizobium alhagi CCNWXJ12-2      |
| P73_3381 | Uncharacterized conserved protein                                                  | Sphingomonas wittichii RW1           |
| P73_3422 | exopolysaccharide synthesis, exoD                                                  | Salinisphaera shabanensis E1L3A      |
| P73_3461 | Membrane proteins related to metalloendopeptidases                                 | Pelagibacterium halotolerans B2      |
| P73_3554 | Uncharacterized protein conserved in bacteria, putative lipoprotein                | Rhizobium mongolense USDA 1844       |
| P73_3555 | EamA-like transporter family                                                       | Nisaea denitrificans DSM 18348       |
| P73_3561 | Molecular chaperone, HSP90 family                                                  | Aromatoleum aromaticum EbN1          |
| P73_3581 | putative restriction endonuclease                                                  | Microvirga lupini Lut6               |
| P73_3634 | putative divalent heavy-metal cations transporter                                  | Citromicrobium sp. JLT1363           |
| P73_3662 | extracellular nuclease                                                             | Ralstonia eutropha H16               |
| P73_3676 | Invasion associated locus B family protein                                         | Bradyrhizobium sp. Cp5.3             |
| P73_3677 | serine protease/outer membrane autotransporter                                     | Azohydromonas australica DSM 1124    |
| P73_3679 | DNA polymerase LigD polymerase domain-containing protein                           | Thalassobaculum salexigens DSM 19539 |
| P73_3716 | transcriptional regulator                                                          | Pseudomonas putida PC9               |
| P73_3717 | 4-oxalomesaconate hydratase                                                        | Amorphus coralli DSM 19760           |
| P73_3720 | 2-polyprenyl-6-methoxyphenol hydroxylase and related FAD-dependent oxidoreductases | Amorphus coralli DSM 19760           |
| P73_3721 | IcIR family transcriptional regulator                                              | Amorphus coralli DSM 19760           |
| P73_3733 | carbamate kinase                                                                   | Martelevella mediterranea DSM 17316  |
| P73_3735 | arginine deiminase                                                                 | Arhodomonas aquaeolei DSM 8974       |
| P73_3738 | TRAP transporter DctQ-like subunit                                                 | Azospirillum brasilense Sp245        |
| P73_3741 | LysR family transcription regulator protein                                        | Bradyrhizobium sp. WSM3983           |
| P73_3742 | thiamine pyrophosphate TPP-binding domain-containing protein                       | Streptomyces violaceoruber 3844-33C  |
| P73_3745 | TRAP dicarboxylate transporter subunit DctP                                        | Neptuniibacter caesariensis MED92    |
| P73_3746 | class III aminotransferase                                                         | Roseomonas cervicalis ATCC 49957     |
| P73_3747 | Leucine-responsive regulatory protein                                              | Inquilingus limosus DSM 16000        |
| P73_3778 | ABC transporter nucleotide binding/ATPase (glycerol-3-phosphate)                   | Ensifer meliloti 4H41                |
| P73_3779 | RpiR family transcriptional regulator                                              | Rhizobium sp. CF142                  |



|          |                                                                   |                                                     |
|----------|-------------------------------------------------------------------|-----------------------------------------------------|
| P73_3780 | Uncharacterized protein conserved in bacteria                     | Microvirga lupini Lut6                              |
| P73_3884 | Salicylate hydroxylase                                            | Pelagibacterium halotolerans B2                     |
| P73_3885 | ABC transporter                                                   | Pelagibacterium halotolerans B2                     |
| P73_3886 | ABC-transporter ATP-binding component                             | Pelagibacterium halotolerans B2                     |
| P73_3887 | nitrate/sulfonate/bicarbonate ABC transporter permease            | Pelagibacterium halotolerans B2                     |
| P73_3889 | transcriptional regulator, TetR family protein                    | Pelagibacterium halotolerans B2                     |
| P73_3917 | GntR family transcriptional regulator                             | Burkholderia xenovorans LB400                       |
| P73_3922 | TonB-dependent outer membrane ferripyoverdine receptor FpvA       | Pseudomonas chlororaphis chlororaphis GP72 (Draft1) |
| P73_3924 | ECF subfamily RNA polymerase sigma-24 factor                      | Labrys methylaminiphilus JLW10                      |
| P73_3930 | curl production assembly/transport component CsgG                 | Amorphus coralli DSM 19760                          |
| P73_3940 | dihydroorotate dehydrogenase family protein                       | Nitratireductor aquibiodomus RA22 (Draft1)          |
| P73_3944 | RpiR family transcriptional regulator                             | Rhizobium sp. CF142                                 |
| P73_3945 | Asp/Glu racemase                                                  | Martelevella mediterranea DSM 17316                 |
| P73_3947 | ABC transporter, nucleotide binding/ATPase protein                | Rhizobium sp. CF142                                 |
| P73_3948 | binding-protein-dependent transport system inner membrane protein | Rhizobium sp. CF142                                 |
| P73_3949 | ABC transporter, membrane spanning protein                        | Microvirga lupini Lut6                              |
| P73_3952 | phosphoenolpyruvate carboxylase                                   | Fulvimarina pelagi HTCC2506                         |
| P73_3956 | nitrate/nitrite regulatory protein                                | Mesorhizobium loti USDA 3471                        |
| P73_3957 | class V aminotransferase                                          | Mesorhizobium loti R7A                              |
| P73_3958 | citrate lyase beta subunit                                        | Mesorhizobium australicum WSM2073                   |
| P73_3959 | malate--CoA ligase subunit beta                                   | Mesorhizobium sp. WSM3224                           |
| P73_3960 | succinyl-CoA synthetase subunit alpha                             | Rhizobium sp. NGR234 (ANU265)                       |
| P73_3961 | NAD-binding D-isomer specific 2-hydroxyacid dehydrogenase         | Ensifer terengae WSM1721                            |
| P73_3962 | TetR family transcriptional regulator                             | Hyphomicrobium sp. MC1                              |
| P73_3965 | methyltransferase/corrinoid binding protein CmuA                  | Hyphomicrobium sp. MC1                              |
| P73_3967 | electron transfer protein PaaE                                    | Hyphomicrobium sp. MC1                              |
| P73_3968 | imidazolonepropionase                                             | Methylobacterium chloromethanicum CM4               |
| P73_3969 | 5,10-methylenetetrahydrofolate reductase                          | Ensifer meliloti 1021                               |
| P73_3974 | aldo/keto reductase                                               | Rhizobium leguminosarum bv. trifolii WSM597         |
| P73_3975 | transcriptional regulator                                         | Frateruia aurantia Kondo 67, DSM 6220               |
| P73_3976 | 4'-phosphopantetheinyl transferase                                | Mesorhizobium ciceri WSM4083                        |
| P73_3987 | ferric siderophore ABC transporter membrane protein               | Nisaea denitrificans DSM 18348                      |
| P73_3991 | Transposase and inactivated derivatives                           | Microvirga lupini Lut6                              |

|          |                                                                      |                                              |
|----------|----------------------------------------------------------------------|----------------------------------------------|
| P73_4004 | Domain of unknown function (DUF4091)                                 | Beutenbergia cavernae HKI 0122, DSM 12333    |
| P73_4005 | Predicted membrane protein (DUF2207)                                 | Martelevella mediterranea DSM 17316          |
| P73_4006 | tripartite ATP-independent periplasmic transporter DctQ component    | Achromobacter arsenitoxydans SY8             |
| P73_4007 | TRAP dicarboxylate transporter subunit DctP                          | Spirochaeta smaragdinae SEBR 4228, DSM 11293 |
| P73_4009 | FAD dependent oxidoreductase                                         | Acetobacteraceae bacterium AT-5844           |
| P73_4010 | LysR family transcriptional regulator                                | Ensifer medicae WSM419                       |
| P73_4011 | LysR family transcriptional regulator                                | Arthrobacter sp. 31Cvi3.1E                   |
| P73_4012 | dibenzothiophene desulfurization enzyme                              | Gordonia alkanivorans NBRC 16433             |
| P73_4013 | 3-mercaptopyruvate sulfurtransferase                                 | Gordonia paraffinivorans NBRC 108238         |
| P73_4014 | amidase                                                              | Gordonia alkanivorans NBRC 16433             |
| P73_4015 | haloacid dehalogenase domain-containing protein hydrolase            | Gordonia paraffinivorans NBRC 108238         |
| P73_4016 | endoribonuclease L-PSP                                               | Micromonospora sp. L5                        |
| P73_4017 | hydroxyethylthiazole kinase                                          | Burkholderia glumae BGR1                     |
| P73_4019 | LysR family transcriptional regulator                                | Cupriavidus necator HPC(L)                   |
| P73_4021 | NADH(P)-binding                                                      | Arhodomonas aquaeolei DSM 8974               |
| P73_4023 | GntR family transcriptional regulator                                | Ochrobactrum intermedium LMG 3301            |
| P73_4024 | Demethylmenaquinone methyltransferase                                | Arthrobacter phenanthrenivorans Sphe3        |
| P73_4026 | binding-protein-dependent transport systems inner membrane component | Kribbella flavida IFO 14399, DSM 17836       |
| P73_4027 | binding-protein-dependent transport systems inner membrane component | Kribbella flavida IFO 14399, DSM 17836       |
| P73_4028 | extracellular solute-binding protein family 1 protein                | Kribbella flavida IFO 14399, DSM 17836       |
| P73_4029 | ribose-5-phosphate isomerase B                                       | Elioraea tepidiphila DSM 17972               |
| P73_4030 | LysR family transcriptional regulator                                | Cupriavidus necator N-1, ATCC 43291          |
| P73_4031 | peptide ABC transporter ATP-binding protein                          | Rhizobium rhizogenes K84                     |
| P73_4032 | ABC transporter permease                                             | Ensifer meliloti 1021                        |
| P73_4033 | ABC transporter, membrane spanning protein (peptide)                 | Agrobacterium tumefaciens C58-UWash          |
| P73_4034 | ABC transporter substrate binding protein                            | Rhizobium leguminosarum bv.                  |

|          |                                                                                                     |                                            |
|----------|-----------------------------------------------------------------------------------------------------|--------------------------------------------|
|          |                                                                                                     | trifolii CC283b                            |
| P73_4035 | oligopeptide ABC transporter substrate binding protein                                              | Rhizobium leguminosarum bv viciae UPM1131  |
| P73_4036 | aliphatic sulfonates family ABC transporter periplasmic ligand-binding protein                      | Amycolatopsis thermoflava N1165, DSM 44574 |
| P73_4037 | acyl-CoA dehydrogenase                                                                              | Conexibacter woesei ID131577, DSM 14684    |
| P73_4038 | monooxygenase                                                                                       | Bradyrhizobium elkanii USDA 3254           |
| P73_4039 | NAD-dependent epimerase/dehydratase                                                                 | Bordetella petrii Se-1111R, DSM 12804      |
| P73_4040 | Gamma-glutamyltranspeptidase protein                                                                | Acetobacter aceti ATCC 23746               |
| P73_4041 | ABC transporter substrate binding protein                                                           | Kaistia adipata DSM 17808                  |
| P73_4042 | TRAP dicarboxylate transporter subunit DctM                                                         | Kaistia granuli DSM 23481                  |
| P73_4043 | alkanesulfonate monooxygenase                                                                       | Rhizobium sp. AP16                         |
| P73_4044 | ABC transporter                                                                                     | Rhizobium sp. AP16                         |
| P73_4045 | nodulation protein nolR                                                                             | Agrobacterium sp. 10MFCol1.1               |
| P73_4048 | GntR family transcriptional regulator                                                               | Cupriavidus taiwanensis LMG 19424          |
| P73_4049 | family 5 extracellular solute-binding protein                                                       | Starkeya novella DSM 506                   |
| P73_4050 | binding-protein-dependent transporters inner membrane component                                     | Starkeya novella DSM 506                   |
| P73_4052 | ABC transporter                                                                                     | Starkeya novella DSM 506                   |
| P73_4053 | NAD-dependent epimerase/dehydratase                                                                 | Starkeya novella DSM 506                   |
| P73_4059 | UDP-N-acetylmuramyl pentapeptide phosphotransferase/UDP-N-acetylglucosamine-1-phosphate transferase | Martelevella mediterranea DSM 17316        |
| P73_4073 | taurine catabolism dioxygenase TauD/TfdA                                                            | Cupriavidus taiwanensis STM6070            |
| P73_4074 | nitrate/sulfonate/bicarbonate ABC transporter ATPase                                                | Variovorax paradoxus 110B                  |
| P73_4076 | LysR family transcriptional regulator                                                               | Bradyrhizobium sp. ARR65                   |
| P73_4077 | sulfonate/nitrate transporter                                                                       | Comamonas testosteroni KF-1                |
| P73_4081 | binding-protein-dependent transport system inner membrane protein                                   | Burkholderia sp. YI23                      |
| P73_4082 | putative sulfonate ABC transporter ATP-binding protein                                              | Burkholderia sp. YI23                      |
| P73_4083 | ABC transporter substrate-binding protein                                                           | Mycobacterium smegmatis MC2 155            |
| P73_4084 | FMN2-dependent monooxygenase                                                                        | Xanthobacter sp. 126                       |
| P73_4085 | FMN-dependent oxidoreductase, nitrilotriacetate monooxygenase                                       | Streptomyces violaceusniger Tu 4113        |
| P73_4086 | putative acyl-CoA dehydrogenase                                                                     | Burkholderia sp. YI23                      |
| P73_4087 | putative oxidoreductase                                                                             | Burkholderia cenocepacia MC0-3             |
| P73_4088 | TetR family transcriptional regulator                                                               | Pseudomonas sp. Ag1                        |
| P73_4090 | putative cystine-binding periplasmic protein                                                        | Rhizobium etli CFN 42, DSM                 |

|          |                                                            |                                                               |
|----------|------------------------------------------------------------|---------------------------------------------------------------|
|          |                                                            | 11541                                                         |
| P73_4092 | ABC transporter ATPase                                     | Meganema perideroedes DSM 15528                               |
| P73_4094 | amidohydrolase                                             | Meganema perideroedes DSM 15528                               |
| P73_4095 | flavin-dependent oxidoreductase                            | Meganema perideroedes DSM 15528                               |
| P73_4096 | luciferase-like monooxygenase superfamily protein          | Meganema perideroedes DSM 15528                               |
| P73_4098 | pyridoxamine 5'-phosphate oxidase                          | Agrobacterium sp. H13-3                                       |
| P73_4099 | twin-arginine translocation pathway signal                 | Chelativorans sp. BNC1                                        |
| P73_4100 | transcriptional regulator                                  | Inquilinus limosus DSM 16000                                  |
| P73_4102 | transcriptional regulator, RpiR family                     | Hoeflea sp. 108                                               |
| P73_4103 | transport protein                                          | Elioraea tepidiphila DSM 17972                                |
| P73_4104 | TRAP-type transport system, small permease                 | Elioraea tepidiphila DSM 17972                                |
| P73_4107 | hydantoin racemase                                         | Cupriavidus basilensis OR16                                   |
| P73_4108 | short-chain dehydrogenase/reductase SDR                    | Mycobacterium chubuense NBB4                                  |
| P73_4109 | Tripartite tricarboxylate transporter TctB family          | Burkholderia sp. WSM2232                                      |
| P73_4111 | Uncharacterized protein conserved in bacteria              | Pelagibacterium halotolerans B2                               |
| P73_4113 | Blr3415 protein                                            | Cupriavidus necator N-1, ATCC 43291                           |
| P73_4117 | NMT1/THI5 like domain-containing protein                   | Mesorhizobium opportunistum WSM2075 (final version from ORNL) |
| P73_4142 | UDP-N-acetylmuramoyl-tripeptide--D-alanyl-D-alanine ligase | Elioraea tepidiphila DSM 17972                                |
| P73_4143 | hypothetical protein                                       | Fischerella sp. PCC 9605                                      |
| P73_4145 | siderophore-interacting protein                            | Halomonas elongata DSM 2581                                   |
| P73_4147 | Fe <sup>3+</sup> siderophore ABC transporter permease      | Halomonas zhanjiangensis DSM 21076                            |
| P73_4148 | transport system permease                                  | Halomonas zhanjiangensis DSM 21076                            |
| P73_4314 | glycosyl transferase family protein                        | Lysobacter defluvii DSM 18482                                 |
| P73_4315 | UDP-N-acetylenolpyruvoylglucosamine reductase              | Marteella mediterranea DSM 17316                              |
| P73_4355 | hypothetical protein                                       | Halomonas lutea DSM 23508                                     |
| P73_4376 | alcohol dehydrogenase GroES domain-containing protein      | Phyllobacterium sp. YR531                                     |
| P73_4393 | MarR family transcriptional regulator                      | Rhizobium leguminosarum bv viciae WSM1481                     |
| P73_4407 | DNA-binding transcriptional activator MhpR                 | Pelagibacterium halotolerans B2                               |
| P73_4408 | oxidoreductase                                             | Duganella violaceinigra DSM 15887                             |
| P73_4409 | ABC transporter permease                                   | Mesorhizobium ciceri WSM4083                                  |

|          |                                                                           |                                         |
|----------|---------------------------------------------------------------------------|-----------------------------------------|
| P73_4410 | ABC transporter substrate-binding protein                                 | Mesorhizobium ciceri CMG6               |
| P73_4412 | hypothetical protein                                                      | Marteella mediterranea DSM 17316        |
| P73_4424 | 6-phosphogluconate dehydrogenase                                          | Vulcanisaeta distributa DSM 14429       |
| P73_4425 | 6-phosphogluconate dehydrogenase                                          | Burkholderia sp. JPY347                 |
| P73_4427 | 6-phosphogluconate dehydrogenase                                          | Burkholderia sp. JPY347                 |
| P73_4428 | 3-hydroxyisobutyrate dehydrogenase                                        | Natranaerobius thermophilus JW/NM-WN-LF |
| P73_4429 | enoyl-CoA hydratase/isomerase                                             | Verminephrobacter eiseniae EF01-2       |
| P73_4430 | oxidoreductase, short-chain dehydrogenase/reductase                       | Bordetella petrii Se-1111R, DSM 12804   |
| P73_4432 | Predicted metal-dependent hydrolase of the TIM-barrel fold                | Bradyrhizobium sp. th.b2                |
| P73_4433 | binding-protein-dependent transport system inner membrane protein         | Chelativorans sp. BNC1                  |
| P73_4434 | ABC transporter                                                           | Nitratireductor pacificus pht-3B        |
| P73_4437 | short chain dehydrogenase                                                 | Frankia sp. QA3                         |
| P73_4440 | amino acid ABC transporter ATP-binding protein                            | Microvirga lupini Lut6                  |
| P73_4442 | putative branched-chain amino acid ABC transporter, periplasmic component | Azospirillum lipoferum 4B               |
| P73_4443 | amidohydrolase 2                                                          | Delftia sp. Cs1-4                       |
| P73_4445 | Uncharacterized conserved protein                                         | Amycolatopsis taiwanensis DSM 45107     |
| P73_4446 | cupin                                                                     | Methylobacterium nodulans ORS 2060      |
| P73_4447 | 3-hydroxyacyl-CoA dehydrogenase                                           | Chelativorans sp. BNC1                  |
| P73_4448 | zinc-binding alcohol dehydrogenase                                        | Chelativorans sp. BNC1                  |
| P73_4449 | 3-hydroxyacyl-CoA dehydrogenase                                           | Chelativorans sp. BNC1                  |
| P73_4450 | acyl-CoA dehydrogenase                                                    | Chelativorans sp. BNC1                  |
| P73_4451 | short-chain dehydrogenase/reductase SDR                                   | Chelativorans sp. BNC1                  |
| P73_4452 | short chain enoyl-CoA hydratase                                           | Chelativorans sp. BNC1                  |
| P73_4453 | AMP-dependent synthetase and ligase                                       | Chelativorans sp. BNC1                  |
| P73_4454 | 1,4-dihydroxy-2-naphthoate synthase                                       | Chelativorans sp. BNC1                  |
| P73_4455 | zinc-binding dehydrogenase family protein 6                               | Achromobacter arsenitoxydans SY8        |
| P73_4458 | carbon-monoxide dehydrogenase small subunit                               | Ensifer fredii HH103                    |
| P73_4460 | acetyl coenzyme A synthetase                                              | Amorphus coralli DSM 19760              |
| P73_4462 | 6-phosphogluconate dehydrogenase                                          | Azohydromonas australica DSM 1124       |
| P73_4463 | acyl-CoA dehydrogenase yngJ                                               | Elioraea tepidiphila DSM 17972          |
| P73_4465 | 2-methylcitrate dehydratase                                               | Candidatus Nitrospira defluvii          |
| P73_4469 | TRAP-type C4-dicarboxylate transport system, small                        | Tistrella mobilis KA081020-065          |

|          |                                                                           |                                           |
|----------|---------------------------------------------------------------------------|-------------------------------------------|
|          | permease component                                                        |                                           |
| P73_4470 | TRAP-T family protein transporter, DctP (Periplasmic binding) subunit     | Alcanivorax dieselolei B5                 |
| P73_4471 | GMC oxidoreductase family protein 5                                       | Achromobacter xylooxidans A8              |
| P73_4473 | carbon monoxide dehydrogenase                                             | Elioraea tepidiphila DSM 17972            |
| P73_4474 | naphthoate synthase                                                       | Acidovorax sp. JHL-9                      |
| P73_4477 | 3-hydroxyacyl-CoA dehydrogenase                                           | Chelativorans sp. BNC1                    |
| P73_4478 | acyl-CoA dehydrogenase                                                    | Chelativorans sp. BNC1                    |
| P73_4479 | short-chain dehydrogenase/reductase SDR                                   | Chelativorans sp. BNC1                    |
| P73_4480 | short chain enoyl-CoA hydratase                                           | Chelativorans sp. BNC1                    |
| P73_4481 | AMP-dependent synthetase and ligase                                       | Chelativorans sp. BNC1                    |
| P73_4482 | 1,4-dihydroxy-2-naphthoate synthase                                       | Chelativorans sp. BNC1                    |
| P73_4483 | L-carnitine dehydratase/bile acid-inducible protein F                     | Chelativorans sp. BNC1                    |
| P73_4484 | amidohydrolase 2                                                          | Delftia sp. Cs1-4                         |
| P73_4485 | acyl-CoA dehydrogenase yngJ                                               | Salinisphaera shabanensis E1L3A           |
| P73_4486 | thiolase                                                                  | Bordetella petrii Se-1111R, DSM 12804     |
| P73_4488 | enoyl-CoA hydratase                                                       | Chelativorans sp. BNC1                    |
| P73_4492 | putative alcohol dehydrogenase                                            | Rhizobium leguminosarum bv. viciae Vh3    |
| P73_4493 | aldehyde dehydrogenase                                                    | Variovorax paradoxus 4MFCol3.1            |
| P73_4496 | oxidoreductase, short-chain dehydrogenase/reductase                       | Bordetella petrii Se-1111R, DSM 12804     |
| P73_4500 | Predicted metal-dependent hydrolase of the TIM-barrel fold                | Acidovorax delafieldii 2AN                |
| P73_4502 | putative aldehyde dehydrogenase                                           | Rhizobium leguminosarum bv viciae 128C53  |
| P73_4521 | (2Fe-2S)-binding domain-containing protein                                | Novosphingobium sp. PP1Y                  |
| P73_4522 | aldehyde oxidase and xanthine dehydrogenase molybdopterin binding protein | Rhizobium tropici CIAT899                 |
| P73_4560 | TIR protein                                                               | Rhodopseudomonas palustris TIE-1          |
| P73_4701 | hypothetical protein                                                      | Desulfomonile tiedjei DCB-1, DSM 6799     |
| P73_4750 | salicylate esterase                                                       | Acinetobacter baylyi ADP1                 |
| P73_4756 | transcriptional regulator                                                 | Methylobacterium sp. WSM2598              |
| P73_4757 | putative oxidoreductase                                                   | Bradyrhizobium sp. Ai1a-2                 |
| P73_4763 | cytochrome P450                                                           | Novosphingobium aromaticivorans DSM 12444 |
| P73_4764 | AraC family transcriptional regulator                                     | Azospirillum brasilense Sp245             |
| P73_4765 | TRAP dicarboxylate transporter subunit DctM                               | Pelagibacterium halotolerans B2           |
| P73_4766 | TRAP dicarboxylate transporter subunit DctQ                               | Pelagibacterium halotolerans B2           |
| P73_4767 | TRAP transporter solute receptor                                          | Pelagibacterium halotolerans B2           |
| P73_4768 | alcohol dehydrogenase                                                     | Microvirga lupini Lut6                    |

|          |                                              |                                                |
|----------|----------------------------------------------|------------------------------------------------|
| P73_4797 | plasmid replication initiator                | Acetobacter aceti ATCC 23746                   |
| P73_4800 | T/G mismatch-specific endonuclease           | Chlorobium phaeobacteroides DSM 266            |
| P73_4801 | hypothetical protein                         | Asticcacaulis excentricus CB 48                |
| P73_4802 | hypothetical protein                         | Methylobacterium populi BJ001                  |
| P73_4804 | DNA-cytosine methyltransferase               | Erythrobacter sp. NAP1                         |
| P73_4808 | ATPase domain-containing protein             | Escherichia coli LF82                          |
| P73_4817 | replicase                                    | Sphingobium yanoikuyae JCM 7371 plasmid pYAN-1 |
| P73_4818 | putative site-specific recombinase-resolvase | Salinarimonas rosea DSM 21201                  |

**Sheet 2 (Excel)**

| COG   | Gene count | % of Total   |
|-------|------------|--------------|
| R     | 105        | 13.3%        |
| P     | 96         | <b>12.1%</b> |
| K     | 90         | <b>11.4%</b> |
| E     | 85         | 10.7%        |
| G     | 77         | <b>9.7%</b>  |
| C     | 63         | <b>8.0%</b>  |
| I     | 51         | <b>6.4%</b>  |
| Q     | 51         | <b>6.4%</b>  |
| S     | 38         | 4.8%         |
| L     | 26         | 3.3%         |
| H     | 24         | 3.0%         |
| M     | 19         | 2.4%         |
| U     | 19         | 2.4%         |
| O     | 15         | 1.9%         |
| V     | 10         | 1.3%         |
| F     | 7          | 0.9%         |
| T     | 7          | 0.9%         |
| J     | 5          | 0.6%         |
| D     | 2          | 0.3%         |
| N     | 2          | 0.3%         |
| Total | 792        |              |

**Data S4 | Transport protein genes in the *Celeribacter indicus* P73<sup>T</sup> genome identified in the Transporter Classification (TC) Database.** Transport protein genes predicted in the TC database (<http://tcdb.org>, 11 October 2013).

| Locus Tag | Product Name | Func ID |
|-----------|--------------|---------|
|-----------|--------------|---------|

|          |                                                                     |           |
|----------|---------------------------------------------------------------------|-----------|
| P73_0004 | amino acid transporter LysE                                         | TC:2.A.76 |
| P73_0014 | ABC-2 type transporter                                              | TC:3.A.1  |
| P73_0015 | Capsule polysaccharide export protein                               | TC:8.A.4  |
| P73_0016 | hypothetical protein                                                | TC:3.A.1  |
| P73_0018 | ABC transporter related protein                                     | TC:3.A.1  |
| P73_0022 | sulfate permease                                                    | TC:2.A.53 |
| P73_0030 | YGGT family                                                         | TC:9.A.4  |
| P73_0037 | Predicted permeases                                                 | TC:9.A.29 |
| P73_0050 | glutamine ABC transporter substrate-binding protein                 | TC:1.A.10 |
| P73_0061 | mechanosensitive ion channel MscS                                   | TC:1.A.23 |
| P73_0065 | Uncharacterized conserved protein                                   | TC:9.B.36 |
| P73_0072 | Permeases of the drug/metabolite transporter (DMT) superfamily      | TC:2.A.7  |
| P73_0081 | Extracellular solute-binding protein, ABC transporter               | TC:3.A.1  |
| P73_0082 | ABC-type spermidine/putrescine transport systems, ATPase component  | TC:3.A.1  |
| P73_0092 | H <sup>+</sup> -transporting two-sector ATPase, alpha/beta subunit  | TC:3.A.2  |
| P73_0096 | flagellar biosynthetic protein FliQ                                 | TC:3.A.6  |
| P73_0103 | flagellar biosynthesis protein FlhB                                 | TC:3.A.6  |
| P73_0104 | flagellar biosynthetic protein FliR                                 | TC:3.A.6  |
| P73_0105 | flagellar biosynthesis protein FlhA                                 | TC:3.A.6  |
| P73_0107 | flagellar motor protein MotA                                        | TC:1.A.30 |
| P73_0111 | flagellar MS-ring protein                                           | TC:3.A.6  |
| P73_0113 | flagellar motor switch protein FliN                                 | TC:3.A.6  |
| P73_0114 | flagellar biosynthesis protein FliP                                 | TC:3.A.6  |
| P73_0119 | chemotaxis MotB protein                                             | TC:1.A.30 |
| P73_0124 | ammonium transporter                                                | TC:1.A.11 |
| P73_0138 | ABC transporter substrate-binding protein                           | TC:3.A.1  |
| P73_0154 | Uncharacterized protein conserved in bacteria                       | TC:2.A.80 |
| P73_0156 | Uncharacterized protein conserved in bacteria                       | TC:2.A.80 |
| P73_0158 | FAD-binding dehydrogenase                                           | TC:5.A.4  |
| P73_0171 | putative TRAP-type C4-dicarboxylate transport system large permease | TC:2.A.56 |
| P73_0172 | TRAP dicarboxylate transporter subunit DctQ                         | TC:2.A.56 |
| P73_0173 | TRAP dicarboxylate transporter subunit DctP                         | TC:2.A.56 |
| P73_0178 | TRAP transporter, 4TM/12TM fusion protein                           | TC:2.A.56 |
| P73_0179 | TRAP transporter solute receptor, TAXI family protein               | TC:2.A.56 |
| P73_0180 | long-chain-fatty-acid-CoA ligase                                    | TC:4.C.1  |
| P73_0184 | putative fatty acid/hydrocarbon transporter                         | TC:1.B.9  |
| P73_0201 | Uncharacterized protein conserved in bacteria                       | TC:3.A.8  |
| P73_0209 | transcription termination factor Rho                                | TC:3.A.2  |
| P73_0229 | sugar ABC transporter                                               | TC:3.A.1  |
| P73_0230 | ribose ABC transporter substrate-binding protein                    | TC:3.A.1  |
| P73_0231 | ribose ABC transporter                                              | TC:3.A.1  |
| P73_0264 | preprotein translocase subunit SecA                                 | TC:3.A.5  |
| P73_0269 | molecular chaperone DnaK                                            | TC:1.A.33 |



|          |                                                                       |           |
|----------|-----------------------------------------------------------------------|-----------|
| P73_0271 | ABC transporter permease                                              | TC:3.A.1  |
| P73_0282 | ABC transporter                                                       | TC:3.A.1  |
| P73_0283 | OstA family protein                                                   | TC:1.B.42 |
| P73_0294 | Permeases of the drug/metabolite transporter (DMT) superfamily        | TC:2.A.7  |
| P73_0303 | Putative permease of the major facilitator superfamily MFS1           | TC:2.A.1  |
| P73_0321 | ABC transporter                                                       | TC:3.A.1  |
| P73_0322 | thiamine transporter membrane protein                                 | TC:3.A.1  |
| P73_0323 | thiamine-binding periplasmic protein                                  | TC:3.A.1  |
| P73_0324 | sodium:dicarboxylate symporter                                        | TC:2.A.23 |
| P73_0338 | long-chain-fatty-acid--CoA ligase                                     | TC:4.C.1  |
| P73_0342 | family 7 extracellular solute-binding protein                         | TC:2.A.56 |
| P73_0343 | TRAP dicarboxylate transporter subunit DctQ                           | TC:2.A.56 |
| P73_0344 | TRAP C4-dicarboxylate transporter permease DctM                       | TC:2.A.56 |
| P73_0355 | OmpW family protein                                                   | TC:1.B.39 |
| P73_0378 | TRAP-type C4-dicarboxylate transport system, large permease component | TC:2.A.56 |
| P73_0403 | secreted periplasmic protein                                          | TC:1.B.42 |
| P73_0418 | DNA translocase FtsK                                                  | TC:3.A.12 |
| P73_0419 | outer membrane lipoprotein carrier protein LolA                       | TC:1.B.46 |
| P73_0421 | membrane transport-like protein                                       | TC:2.A.69 |
| P73_0429 | Sodium/proline symporter                                              | TC:2.A.21 |
| P73_0453 | Arabinose efflux permease                                             | TC:2.A.1  |
| P73_0457 | SPFH domain, Band 7 family protein                                    | TC:8.A.21 |
| P73_0466 | sulfite oxidase subunit YedZ                                          | TC:5.B.1  |
| P73_0466 | sulfite oxidase subunit YedZ                                          | TC:9.B.43 |
| P73_0471 | P-type ATPase, translocating                                          | TC:3.A.3  |
| P73_0496 | inner-membrane translocator                                           | TC:3.A.1  |
| P73_0497 | ABC transporter substrate-binding protein                             | TC:3.A.1  |
| P73_0498 | ABC transporter                                                       | TC:3.A.1  |
| P73_0500 | ribose ABC transporter ATP-binding protein                            | TC:3.A.1  |
| P73_0503 | putative periplasmic substrate binding protein                        | TC:2.A.56 |
| P73_0504 | TRAP-type C4-dicarboxylate transport system small permease            | TC:2.A.56 |
| P73_0505 | TRAP dicarboxylate transporter                                        | TC:2.A.56 |
| P73_0510 | MotA/TolQ/ExbB proton channel                                         | TC:1.A.30 |
| P73_0511 | biopolymer transport protein ExbD/TolR                                | TC:1.A.30 |
| P73_0512 | biopolymer transport protein                                          | TC:1.A.30 |
| P73_0517 | polysaccharide synthesis/modification protein                         | TC:9.A.41 |
| P73_0533 | Uncharacterized conserved protein                                     | TC:2.A.89 |
| P73_0536 | transporter, MFS family protein                                       | TC:2.A.1  |
| P73_0556 | Small-conductance mechanosensitive channel                            | TC:1.A.23 |
| P73_0561 | type I secretion membrane fusion protein                              | TC:8.A.1  |
| P73_0562 | type I secretion system ATPase                                        | TC:3.A.1  |
| P73_0567 | ammonium transporter                                                  | TC:1.A.11 |
| P73_0574 | Permeases of the drug/metabolite transporter (DMT) superfamily        | TC:2.A.7  |

|          |                                                                     |           |
|----------|---------------------------------------------------------------------|-----------|
| P73_0579 | LrgA family protein                                                 | TC:1.E.14 |
| P73_0595 | Predicted membrane protein                                          | TC:1.A.62 |
| P73_0597 | lysine exporter protein LysE/YggA                                   | TC:2.A.76 |
| P73_0613 | Predicted permeases                                                 | TC:9.A.29 |
| P73_0619 | PTS system mannose-specific EIIA component-like protein             | TC:4.A.6  |
| P73_0635 | preprotein translocase subunit SecE                                 | TC:3.A.5  |
| P73_0656 | voltage-gated sodium channel                                        | TC:1.A.1  |
| P73_0673 | preprotein translocase subunit SecY                                 | TC:3.A.5  |
| P73_0682 | camphor resistance protein CrcB                                     | TC:9.B.71 |
| P73_0686 | glutamate/glutamine/aspartate/asparagine-binding protein BztA       | TC:3.A.1  |
| P73_0687 | glutamate/glutamine/aspartate/asparagine ABC transporter permease   | TC:3.A.1  |
| P73_0688 | amino acid ABC transporter permease                                 | TC:3.A.1  |
| P73_0689 | ABC transporter                                                     | TC:3.A.1  |
| P73_0693 | membrane protein insertase                                          | TC:3.A.5  |
| P73_0703 | polysaccharide export protein, translocase                          | TC:2.A.66 |
| P73_0728 | EmrB/QacA family drug resistance transporter                        | TC:2.A.1  |
| P73_0729 | multidrug resistance protein K                                      | TC:8.A.1  |
| P73_0747 | signal recognition particle protein                                 | TC:3.A.5  |
| P73_0750 | EamA-like transporter family                                        | TC:2.A.7  |
| P73_0753 | F0F1 ATP synthase subunit A                                         | TC:3.A.2  |
| P73_0754 | F0F1 ATP synthase subunit C                                         | TC:3.A.2  |
| P73_0755 | F0F1 ATP synthase subunit B'                                        | TC:3.A.2  |
| P73_0756 | F0F1 ATP synthase subunit B                                         | TC:3.A.2  |
| P73_0769 | ABC transporter ATP-binding protein                                 | TC:3.A.1  |
| P73_0775 | cation efflux system protein                                        | TC:2.A.4  |
| P73_0801 | phosphonate ABC transporter ATP-binding protein                     | TC:3.A.1  |
| P73_0802 | phosphate uptake ABC transporter periplasmic solute-binding protein | TC:3.A.1  |
| P73_0803 | phosphonate ABC transporter permease                                | TC:3.A.1  |
| P73_0804 | phosphonate ABC transporter permease                                | TC:3.A.1  |
| P73_0813 | phosphonate C-P lyase system protein PhnK                           | TC:3.A.1  |
| P73_0814 | Fis family transcriptional regulator                                | TC:1.A.35 |
| P73_0815 | phosphonates transport ATP-binding protein PhnL                     | TC:3.A.1  |
| P73_0826 | ABC transporter-like protein                                        | TC:3.A.1  |
| P73_0827 | Formate/nitrite family of transporters                              | TC:2.A.44 |
| P73_0851 | ABC transporter                                                     | TC:3.A.1  |
| P73_0852 | ABC transporter ATP-binding protein                                 | TC:3.A.1  |
| P73_0854 | ABC transporter                                                     | TC:3.A.1  |
| P73_0859 | phosphate transporter                                               | TC:2.A.20 |
| P73_0862 | cation transporter                                                  | TC:2.A.38 |
| P73_0900 | MATE efflux family protein                                          | TC:2.A.66 |
| P73_0925 | AMP-binding domain protein                                          | TC:4.C.1  |
| P73_0929 | ABC transporter ATP-binding protein/permease                        | TC:3.A.1  |
| P73_0930 | glycine betaine ABC transporter substrate-binding protein           | TC:3.A.1  |

|          |                                                                                                   |           |
|----------|---------------------------------------------------------------------------------------------------|-----------|
| P73_0931 | permease                                                                                          | TC:3.A.1  |
| P73_0932 | ABC transporter permease                                                                          | TC:3.A.1  |
| P73_0965 | transmembrane protein                                                                             | TC:9.A.29 |
| P73_0981 | conjugal transfer coupling protein TraG                                                           | TC:3.A.7  |
| P73_0985 | conjugal transfer protein TrbC                                                                    | TC:3.A.7  |
| P73_0986 | conjugal transfer protein TrbB                                                                    | TC:3.A.7  |
| P73_0987 | conjugal transfer ATPase TrbE                                                                     | TC:3.A.7  |
| P73_0990 | conjugal transfer protein TrbL                                                                    | TC:3.A.7  |
| P73_0991 | conjugal transfer protein TrbF                                                                    | TC:3.A.7  |
| P73_0992 | P-type conjugative transfer protein TrbG                                                          | TC:3.A.7  |
| P73_0993 | conjugation TrbI family protein                                                                   | TC:3.A.7  |
| P73_1003 | disulfide bond formation-like protein                                                             | TC:5.A.2  |
| P73_1006 | heavy metal translocating P-type ATPase                                                           | TC:3.A.3  |
| P73_1008 | cobalt-zinc-cadmium resistance protein CzcD                                                       | TC:2.A.4  |
| P73_1013 | cysteine ABC transporter ATP-binding protein/permease CydD                                        | TC:3.A.1  |
| P73_1014 | manganese transport protein MntH                                                                  | TC:2.A.55 |
| P73_1034 | iron siderophore/cobalamin ABC transporter ATP-binding protein                                    | TC:3.A.1  |
| P73_1035 | iron siderophore/cobalamin ABC transporter permease                                               | TC:3.A.1  |
| P73_1036 | iron siderophore/cobalamin ABC transporter periplasmic iron siderophore/cobalamin-binding protein | TC:3.A.1  |
| P73_1039 | binding-protein-dependent transporter inner membrane component                                    | TC:3.A.1  |
| P73_1040 | ABC transporter                                                                                   | TC:3.A.1  |
| P73_1044 | EmrB/QacA family drug resistance transporter                                                      | TC:2.A.1  |
| P73_1045 | oligopeptide ABC transporter oligopeptide-binding protein                                         | TC:3.A.1  |
| P73_1046 | ABC transporter ATP-binding protein                                                               | TC:3.A.1  |
| P73_1047 | peptide ABC transporter permease                                                                  | TC:3.A.1  |
| P73_1048 | binding-protein-dependent transport systems inner membrane component                              | TC:3.A.1  |
| P73_1057 | TRAP-type C4-dicarboxylate transport system, periplasmic component                                | TC:2.A.56 |
| P73_1059 | ABC transporter                                                                                   | TC:3.A.1  |
| P73_1062 | extracellular solute-binding protein                                                              | TC:3.A.1  |
| P73_1063 | binding-protein-dependent transport system inner membrane protein                                 | TC:3.A.1  |
| P73_1067 | ABC transporter ATPase                                                                            | TC:3.A.1  |
| P73_1068 | ABC transporter                                                                                   | TC:3.A.1  |
| P73_1070 | ABC transporter substrate-binding protein                                                         | TC:3.A.1  |
| P73_1078 | ABC transporter-like protein                                                                      | TC:3.A.1  |
| P73_1079 | phosphonate C-P lyase system protein, PhnL                                                        | TC:3.A.1  |
| P73_1081 | phosphonate/organophosphate ester transporter subunit                                             | TC:3.A.1  |
| P73_1082 | ABC transporter, phosphonate, periplasmic substrate-binding protein phnD                          | TC:3.A.1  |
| P73_1083 | phosphonate ABC transporter inner membrane subunit                                                | TC:3.A.1  |
| P73_1084 | phosphonate ABC transporter inner membrane subunit                                                | TC:3.A.1  |
| P73_1086 | Predicted permeases                                                                               | TC:9.B.28 |
| P73_1092 | Mn+2/Fe+2 ABC transporter substrate-binding protein SitA                                          | TC:3.A.1  |
| P73_1093 | Mn+2/Fe+2 ABC transporter ATPase SitB                                                             | TC:3.A.1  |

|          |                                                                        |           |
|----------|------------------------------------------------------------------------|-----------|
| P73_1094 | ABC-3 protein                                                          | TC:3.A.1  |
| P73_1095 | Mn+2/Fe+2 ABC transporter inner membrane protein SitD                  | TC:3.A.1  |
| P73_1097 | heme receptor                                                          | TC:1.B.14 |
| P73_1101 | ABC transporter                                                        | TC:3.A.1  |
| P73_1102 | ABC transporter                                                        | TC:3.A.1  |
| P73_1103 | binding-protein-dependent transport system inner membrane protein      | TC:3.A.1  |
| P73_1104 | binding-protein-dependent transport system inner membrane protein      | TC:3.A.1  |
| P73_1105 | extracellular solute-binding protein                                   | TC:3.A.1  |
| P73_1114 | protein secretion protein                                              | TC:8.A.1  |
| P73_1115 | hydrophobe/amphiphile efflux-1 (HAE1) family transporter               | TC:2.A.6  |
| P73_1123 | transporter                                                            | TC:2.A.47 |
| P73_1124 | ABC transporter                                                        | TC:3.A.1  |
| P73_1126 | aliphatic sulfonate ABC transporter permease                           | TC:3.A.1  |
| P73_1132 | sodium-dependent inorganic phosphate (Pi) transporter                  | TC:2.A.58 |
| P73_1135 | sulfate ABC transporter inner membrane subunit CysT                    | TC:3.A.1  |
| P73_1137 | sulfate ABC transporter ATPase                                         | TC:3.A.1  |
| P73_1140 | sulfate ABC transporter ATPase                                         | TC:3.A.1  |
| P73_1143 | sulfate ABC transporter, inner membrane subunit CysT                   | TC:3.A.1  |
| P73_1144 | sulfate adenyltransferase                                              | TC:3.A.1  |
| P73_1150 | ectoine/hydroxyectoine ABC transporter substrate-binding protein       | TC:3.A.1  |
| P73_1151 | ectoine/hydroxyectoine ABC transporter permease EhuC                   | TC:3.A.1  |
| P73_1152 | amino acid ABC transporter permease                                    | TC:3.A.1  |
| P73_1153 | ectoine/hydroxyectoine ABC transporter ATP- binding protein            | TC:3.A.1  |
| P73_1167 | putative polysaccharide biosynthesis/export protein                    | TC:1.B.18 |
| P73_1181 | major facilitator superfamily protein                                  | TC:2.A.1  |
| P73_1192 | MotA/TolQ/ExbB proton channel                                          | TC:1.A.30 |
| P73_1193 | biopolymer transport protein ExbD/TolR                                 | TC:1.A.30 |
| P73_1215 | Outer membrane general secretion pathway protein, secretin             | TC:1.B.22 |
| P73_1244 | sulfate transporter                                                    | TC:2.A.53 |
| P73_1256 | ACR3 family arsenite efflux pump                                       | TC:2.A.59 |
| P73_1259 | TolC family type I secretion outer membrane protein                    | TC:1.B.17 |
| P73_1269 | efflux ABC transporter transmembrane ATP-binding protein               | TC:3.A.1  |
| P73_1282 | rhomboid family protein                                                | TC:3.A.1  |
| P73_1296 | major facilitator superfamily protein                                  | TC:2.A.1  |
| P73_1303 | major facilitator transporter                                          | TC:2.A.1  |
| P73_1322 | hemolysin                                                              | TC:9.A.40 |
| P73_1327 | Uncharacterized protein conserved in bacteria                          | TC:2.A.7  |
| P73_1343 | major facilitator superfamily protein                                  | TC:2.A.1  |
| P73_1345 | zinc (Zn <sup>2+</sup> )-iron permease family metal cation transporter | TC:2.A.5  |
| P73_1352 | phage head morphogenesis domain-containing protein                     | TC:9.B.78 |
| P73_1364 | ribose ABC transporter periplasmic binding protein                     | TC:3.A.1  |
| P73_1365 | ABC transporter                                                        | TC:3.A.1  |
| P73_1366 | ribose ABC transporter permease                                        | TC:3.A.1  |

|          |                                                                         |           |
|----------|-------------------------------------------------------------------------|-----------|
| P73_1368 | glycerol-3-phosphate transporter ATP-binding subunit                    | TC:3.A.1  |
| P73_1369 | binding-protein-dependent transport systems inner membrane component    | TC:3.A.1  |
| P73_1370 | ABC transporter permease                                                | TC:3.A.1  |
| P73_1371 | ABC transporter substrate binding protein                               | TC:3.A.1  |
| P73_1378 | TRAP transporter solute receptor subunit DctP family protein 7          | TC:2.A.56 |
| P73_1379 | C4-dicarboxylate transport system (Permease small protein)              | TC:2.A.56 |
| P73_1380 | C4-dicarboxylate transport system (Permease large protein)              | TC:2.A.56 |
| P73_1391 | DctP                                                                    | TC:2.A.56 |
| P73_1392 | tripartite ATP-independent periplasmic transporter DctQ                 | TC:2.A.56 |
| P73_1393 | TRAP dicarboxylate transporter subunit DctM                             | TC:2.A.56 |
| P73_1408 | HlyD family secretion protein                                           | TC:8.A.1  |
| P73_1436 | ABC-type Fe <sup>3+</sup> transport system, substrate binding component | TC:3.A.1  |
| P73_1437 | spermidine/putrescine ABC transporter ATPase                            | TC:3.A.1  |
| P73_1438 | binding-protein-dependent transport system inner membrane protein       | TC:3.A.1  |
| P73_1440 | ABC transporter-like protein                                            | TC:3.A.1  |
| P73_1441 | binding-protein-dependent transporter inner membrane component          | TC:3.A.1  |
| P73_1458 | TRAP dicarboxylate transporter subunit DctM                             | TC:2.A.56 |
| P73_1459 | TRAP-type C4-dicarboxylate transport system, small permease component   | TC:2.A.56 |
| P73_1460 | TRAP dicarboxylate transporter subunit DctP                             | TC:2.A.56 |
| P73_1464 | TRAP-type C4-dicarboxylate transporter periplasmic protein              | TC:2.A.56 |
| P73_1465 | TRAP-type C4-dicarboxylate transport system, small permease component   | TC:2.A.56 |
| P73_1466 | TRAP dicarboxylate transporter                                          | TC:2.A.56 |
| P73_1468 | feruloyl-CoA synthase                                                   | TC:4.C.1  |
| P73_1471 | cobalt transport protein                                                | TC:3.A.1  |
| P73_1472 | ABC transporter                                                         | TC:3.A.1  |
| P73_1473 | BioY protein                                                            | TC:2.A.88 |
| P73_1506 | OmpW family protein                                                     | TC:1.B.39 |
| P73_1519 | Predicted membrane protein                                              | TC:2.A.7  |
| P73_1520 | Integral membrane protein, interacts with FtsH                          | TC:9.B.24 |
| P73_1529 | magnesium transporter                                                   | TC:9.A.19 |
| P73_1532 | Di- and tricarboxylate transporters                                     | TC:2.A.47 |
| P73_1535 | L-lysine exporter                                                       | TC:2.A.75 |
| P73_1536 | Predicted permease, DMT superfamily                                     | TC:2.A.7  |
| P73_1539 | citrate transporter                                                     | TC:2.A.47 |
| P73_1546 | formate dehydrogenase subunit alpha                                     | TC:5.A.3  |
| P73_1562 | integral membrane protein, MarC family                                  | TC:2.A.95 |
| P73_1582 | cytochrome c-type biogenesis protein CcmF                               | TC:9.B.14 |
| P73_1597 | C4-dicarboxylate-binding periplasmic protein DctP                       | TC:2.A.56 |
| P73_1598 | tripartite ATP-independent periplasmic transporter DctQ                 | TC:2.A.56 |
| P73_1599 | TRAP C4-dicarboxylate transport system permease DctM                    | TC:2.A.56 |
| P73_1604 | Predicted permeases                                                     | TC:2.A.7  |
| P73_1610 | Uncharacterized protein conserved in bacteria                           | TC:9.B.22 |
| P73_1612 | major facilitator superfamily protein                                   | TC:2.A.1  |

|          |                                                                    |           |
|----------|--------------------------------------------------------------------|-----------|
| P73_1623 | protein translocase subunit yajC                                   | TC:3.A.5  |
| P73_1623 | protein translocase subunit yajC                                   | TC:9.B.18 |
| P73_1624 | preprotein translocase subunit SecD                                | TC:2.A.6  |
| P73_1626 | cytochrome c biogenesis protein CcmA                               | TC:3.A.1  |
| P73_1627 | heme exporter protein CcmB                                         | TC:3.A.1  |
| P73_1628 | heme exporter protein CcmC                                         | TC:9.B.14 |
| P73_1636 | Permeases of the drug/metabolite transporter (DMT) superfamily     | TC:2.A.7  |
| P73_1652 | oligopeptide ABC transporter substrate binding protein             | TC:3.A.1  |
| P73_1653 | dipeptide ABC transporter permease                                 | TC:3.A.1  |
| P73_1654 | dipeptide ABC transporter                                          | TC:3.A.1  |
| P73_1655 | peptide ABC transporter ATP-binding protein                        | TC:3.A.1  |
| P73_1656 | ABC transporter                                                    | TC:3.A.1  |
| P73_1661 | rhamnose ABC transporter periplasmic rhamnose-binding protein RhaS | TC:3.A.1  |
| P73_1662 | ribose import ATP-binding protein                                  | TC:3.A.1  |
| P73_1663 | putative-binding-protein-dependent transport system permease       | TC:3.A.1  |
| P73_1664 | sugar ABC transporter permease                                     | TC:3.A.1  |
| P73_1681 | ion transport 2 family protein                                     | TC:1.A.1  |
| P73_1719 | Permeases of the drug/metabolite transporter (DMT) superfamily     | TC:2.A.7  |
| P73_1722 | sodium/proton antiporter, CPA1 family (TC 2.A.36)                  | TC:2.A.36 |
| P73_1744 | cytochrome c-type biogenesis protein CcdA                          | TC:5.A.1  |
| P73_1748 | mechanosensitive ion channel protein MscS                          | TC:1.A.23 |
| P73_1755 | conjugation TrbI family protein                                    | TC:3.A.7  |
| P73_1756 | P-type conjugative transfer protein TrbG                           | TC:3.A.7  |
| P73_1757 | conjugal transfer protein TrbF                                     | TC:3.A.7  |
| P73_1758 | conjugal transfer protein TrbL                                     | TC:3.A.7  |
| P73_1761 | conjugal transfer ATPase TrbE                                      | TC:3.A.7  |
| P73_1762 | conjugal transfer protein TrbB                                     | TC:3.A.7  |
| P73_1763 | conjugal transfer protein TrbC                                     | TC:3.A.7  |
| P73_1766 | conjugal transfer coupling protein TraG                            | TC:3.A.7  |
| P73_1769 | multidrug resistance protein A                                     | TC:8.A.1  |
| P73_1770 | major facilitator transporter                                      | TC:2.A.1  |
| P73_1798 | SMC protein, N-terminal domain-containing protein                  | TC:3.A.1  |
| P73_1871 | SMC protein, N-terminal domain-containing protein                  | TC:3.A.1  |
| P73_1935 | heavy metal translocating P-type ATPase                            | TC:3.A.3  |
| P73_1948 | ABC transporter                                                    | TC:3.A.1  |
| P73_1949 | nitrate/sulfonate/bicarbonate ABC transporter permease             | TC:3.A.1  |
| P73_1950 | ABC transporter-like protein permease                              | TC:3.A.1  |
| P73_1974 | Predicted permease                                                 | TC:2.A.86 |
| P73_1985 | TRAP dicarboxylate transporter, DctP subunit                       | TC:2.A.56 |
| P73_1986 | tripartite ATP-independent periplasmic transporter DctQ            | TC:2.A.56 |
| P73_1987 | TRAP dicarboxylate transporter, DctM subunit                       | TC:2.A.56 |
| P73_1997 | glutathione ABC transporter permease GsiC                          | TC:3.A.1  |
| P73_1998 | binding-protein-dependent transport system inner membrane protein  | TC:3.A.1  |

|          |                                                                                       |           |
|----------|---------------------------------------------------------------------------------------|-----------|
| P73_1999 | extracellular solute-binding protein                                                  | TC:3.A.1  |
| P73_2000 | major facilitator superfamily transporter                                             | TC:2.A.1  |
| P73_2001 | ABC transporter nucleotide binding/ATPase protein                                     | TC:3.A.1  |
| P73_2007 | biotin sulfoxide reductase                                                            | TC:5.A.3  |
| P73_2010 | transmembrane protein                                                                 | TC:2.A.80 |
| P73_2013 | Uncharacterized protein conserved in bacteria                                         | TC:2.A.80 |
| P73_2015 | EmrB/QacA subfamily drug resistance transporter                                       | TC:2.A.1  |
| P73_2025 | ABC transporter                                                                       | TC:3.A.1  |
| P73_2026 | binding-protein-dependent transport system inner membrane protein                     | TC:3.A.1  |
| P73_2027 | iron(III) ABC transporter iron (III)-binding protein                                  | TC:3.A.1  |
| P73_2035 | aliphatic sulfonates transporter ATP-binding protein SsuB                             | TC:3.A.1  |
| P73_2036 | ABC transporter permease                                                              | TC:3.A.1  |
| P73_2039 | ATPase, E1-E2 type                                                                    | TC:3.A.3  |
| P73_2043 | ABC transporter substrate-binding protein                                             | TC:3.A.1  |
| P73_2044 | ABC transporter substrate-binding protein                                             | TC:3.A.1  |
| P73_2047 | ABC transporter substrate-binding protein                                             | TC:3.A.1  |
| P73_2048 | ABC transporter                                                                       | TC:3.A.1  |
| P73_2049 | binding-protein-dependent transport system inner membrane protein                     | TC:3.A.1  |
| P73_2050 | TRAP dicarboxylate transporter subunit DctP                                           | TC:2.A.56 |
| P73_2051 | TRAP-type C4-dicarboxylate transport system, small permease component                 | TC:2.A.56 |
| P73_2052 | TRAP dicarboxylate transporter subunit DctM                                           | TC:2.A.56 |
| P73_2055 | polar amino acid ABC transporter inner membrane subunit                               | TC:3.A.1  |
| P73_2056 | polar amino acid ABC transporter inner membrane subunit                               | TC:3.A.1  |
| P73_2057 | ABC transporter                                                                       | TC:3.A.1  |
| P73_2058 | extracellular solute-binding protein                                                  | TC:3.A.1  |
| P73_2070 | ABC transporter substrate-binding protein                                             | TC:2.A.56 |
| P73_2071 | TRAP transport system, small permease protein                                         | TC:2.A.56 |
| P73_2072 | TRAP transporter, DctM subunit                                                        | TC:2.A.56 |
| P73_2079 | aliphatic sulfonate ABC transporter permease                                          | TC:3.A.1  |
| P73_2080 | ABC transporter-like protein                                                          | TC:3.A.1  |
| P73_2082 | taurine transport system permease                                                     | TC:3.A.1  |
| P73_2083 | taurine transporter ATP-binding subunit                                               | TC:3.A.1  |
| P73_2084 | taurine ABC transporter periplasmic binding protein                                   | TC:3.A.1  |
| P73_2088 | TRAP-type mannitol/chloroaromatic compound transport system, small permease component | TC:2.A.56 |
| P73_2089 | TRAP dicarboxylate transporter subunit DctM                                           | TC:2.A.56 |
| P73_2090 | TRAP dicarboxylate transporter- DctP subunit                                          | TC:2.A.56 |
| P73_2096 | TRAP dicarboxylate transporter subunit DctM                                           | TC:2.A.56 |
| P73_2097 | TRAP dicarboxylate transporter subunit DctQ                                           | TC:2.A.56 |
| P73_2098 | putative periplasmic substrate binding protein                                        | TC:2.A.56 |
| P73_2103 | ABC transporter                                                                       | TC:3.A.1  |
| P73_2104 | transport system permease                                                             | TC:3.A.1  |
| P73_2105 | periplasmic binding protein                                                           | TC:3.A.1  |

|          |                                                                              |           |
|----------|------------------------------------------------------------------------------|-----------|
| P73_2110 | TRAP dicarboxylate transporter subunit DctQ                                  | TC:2.A.56 |
| P73_2111 | TRAP transporter, DctM subunit subfamily protein                             | TC:2.A.56 |
| P73_2112 | TRAP transporter-DctP subunit                                                | TC:2.A.56 |
| P73_2114 | TonB-dependent receptor precursor                                            | TC:1.B.14 |
| P73_2117 | FAD-dependent pyridine nucleotide-disulfide oxidoreductase                   | TC:5.A.4  |
| P73_2119 | ABC-type nitrate/sulfonate/bicarbonate transport system, ATPase component    | TC:3.A.1  |
| P73_2120 | ABC transporter permease                                                     | TC:3.A.1  |
| P73_2122 | drug resistance transporter, EmrB/QacA subfamily protein                     | TC:2.A.1  |
| P73_2124 | C4-dicarboxylate transport system permease large protein                     | TC:2.A.56 |
| P73_2125 | Sialic acid TRAP transporter permease protein siaT                           | TC:2.A.56 |
| P73_2126 | C4-dicarboxylate transport system                                            | TC:2.A.56 |
| P73_2129 | putative amino-acid ABC transporter, periplasmic solute-binding protein      | TC:3.A.1  |
| P73_2130 | amino-acid ABC transporter, permease protein                                 | TC:3.A.1  |
| P73_2131 | putative amino-acid ABC transporter, ATP-binding protein                     | TC:3.A.1  |
| P73_2135 | NitT/TauT family transport system ATP-binding protein                        | TC:3.A.1  |
| P73_2136 | NitT/TauT family transport system permease protein                           | TC:3.A.1  |
| P73_2140 | ABC transporter ATP-binding protein                                          | TC:3.A.1  |
| P73_2141 | ABC transporter membrane subunit                                             | TC:3.A.1  |
| P73_2148 | ABC transporter                                                              | TC:3.A.1  |
| P73_2149 | binding-protein-dependent transport system inner membrane protein            | TC:3.A.1  |
| P73_2158 | membrane protein                                                             | TC:9.A.29 |
| P73_2160 | extracellular solute-binding protein                                         | TC:3.A.1  |
| P73_2161 | ABC-type dipeptide/oligopeptide/nickel transport systems, permease component | TC:3.A.1  |
| P73_2162 | ABC transporter permease                                                     | TC:3.A.1  |
| P73_2163 | oligopeptide/dipeptide ABC transporter, ATPase subunit                       | TC:3.A.1  |
| P73_2164 | oligopeptide/dipeptide ABC transporter, ATPase subunit                       | TC:3.A.1  |
| P73_2171 | Sulfite exporter TauE/SafE                                                   | TC:9.A.29 |
| P73_2190 | extracellular solute-binding protein                                         | TC:3.A.1  |
| P73_2191 | binding-protein-dependent transport system inner membrane protein            | TC:3.A.1  |
| P73_2192 | binding-protein-dependent transport system inner membrane protein            | TC:3.A.1  |
| P73_2194 | alpha-glucoside transport ATP-binding protein AglK                           | TC:3.A.1  |
| P73_2195 | tellurite resistance protein                                                 | TC:2.A.16 |
| P73_2204 | small multidrug resistance protein                                           | TC:2.A.7  |
| P73_2207 | urease accessory protein                                                     | TC:2.A.99 |
| P73_2210 | Uncharacterized membrane protein                                             | TC:2.A.89 |
| P73_2216 | spermidine/putrescine transport system permease                              | TC:3.A.1  |
| P73_2217 | binding-protein-dependent transport system inner membrane protein            | TC:3.A.1  |
| P73_2218 | polyamine ABC transporter ATP-binding protein PotG                           | TC:3.A.1  |
| P73_2223 | EamA-like transporter family                                                 | TC:2.A.7  |
| P73_2224 | aromatic hydrocarbon degradation membrane protein                            | TC:1.B.9  |
| P73_2225 | Predicted permeases                                                          | TC:2.A.7  |
| P73_2238 | Predicted permeases                                                          | TC:9.A.29 |



|          |                                                                                       |           |
|----------|---------------------------------------------------------------------------------------|-----------|
| P73_2239 | ammonium transporter                                                                  | TC:1.A.11 |
| P73_2249 | trk system potassium uptake protein TrkH                                              | TC:2.A.38 |
| P73_2253 | small multidrug resistance protein                                                    | TC:2.A.7  |
| P73_2286 | conjugal transfer coupling protein TraG                                               | TC:3.A.7  |
| P73_2289 | conjugal transfer protein TrbC                                                        | TC:3.A.7  |
| P73_2290 | conjugal transfer protein TrbB                                                        | TC:3.A.7  |
| P73_2291 | conjugal transfer ATPase TrbE                                                         | TC:3.A.7  |
| P73_2294 | conjugal transfer protein TrbL                                                        | TC:3.A.7  |
| P73_2295 | conjugal transfer protein TrbF                                                        | TC:3.A.7  |
| P73_2296 | P-type conjugative transfer protein TrbG                                              | TC:3.A.7  |
| P73_2297 | conjugation TrbI family protein                                                       | TC:3.A.7  |
| P73_2324 | ABC transporter permease                                                              | TC:3.A.1  |
| P73_2325 | ABC transporter permease                                                              | TC:3.A.1  |
| P73_2326 | spermidine/putrescine-binding periplasmic protein                                     | TC:3.A.1  |
| P73_2327 | ABC transporter ATP-binding protein                                                   | TC:3.A.1  |
| P73_2336 | twin-arginine translocation pathway signal                                            | TC:3.A.1  |
| P73_2337 | binding-protein-dependent transport system inner membrane protein                     | TC:3.A.1  |
| P73_2338 | binding-protein-dependent transport system inner membrane protein                     | TC:3.A.1  |
| P73_2339 | oligopeptide/dipeptide ABC transporter ATPase                                         | TC:3.A.1  |
| P73_2340 | oligopeptide/dipeptide ABC transporter ATPase                                         | TC:3.A.1  |
| P73_2375 | ABC-2 type transporter                                                                | TC:3.A.1  |
| P73_2376 | ABC transporter related protein                                                       | TC:3.A.1  |
| P73_2377 | secretion protein HlyD family protein                                                 | TC:8.A.1  |
| P73_2380 | binding-protein-dependent transport system inner membrane protein                     | TC:3.A.1  |
| P73_2381 | putative alkanesulfonate transport protein, ABC superfamily, inner membrane component | TC:3.A.1  |
| P73_2382 | ABC transporter                                                                       | TC:3.A.1  |
| P73_2384 | glucose-inhibited division protein A                                                  | TC:5.A.4  |
| P73_2386 | Binding-protein-dependent transport systems inner membrane component                  | TC:3.A.1  |
| P73_2387 | binding-protein-dependent transport systems inner membrane component                  | TC:3.A.1  |
| P73_2388 | Spermidine/putrescine-binding periplasmic protein                                     | TC:3.A.1  |
| P73_2389 | spermidine/putrescine ABC transporter ATPase                                          | TC:3.A.1  |
| P73_2395 | lysine exporter protein LysE/YggA                                                     | TC:2.A.76 |
| P73_2397 | Predicted permeases                                                                   | TC:9.A.29 |
| P73_2399 | outer membrane receptor FepA                                                          | TC:1.B.14 |
| P73_2411 | ABC transporter permease                                                              | TC:3.A.1  |
| P73_2412 | ABC transporter related protein                                                       | TC:3.A.1  |
| P73_2413 | periplasmic binding protein/LacI transcriptional regulator                            | TC:3.A.1  |
| P73_2415 | transport system permease                                                             | TC:3.A.1  |
| P73_2416 | ferric vibriobactin receptor                                                          | TC:1.B.14 |
| P73_2417 | Bcr/CflA subfamily drug resistance transporter                                        | TC:2.A.1  |
| P73_2421 | LacI family transcriptional regulator                                                 | TC:3.A.1  |
| P73_2447 | polysaccharide biosynthesis protein                                                   | TC:2.A.66 |

|          |                                                                    |           |
|----------|--------------------------------------------------------------------|-----------|
| P73_2483 | choline/carnitine/betaine transporter                              | TC:2.A.15 |
| P73_2489 | family 1 extracellular solute-binding protein                      | TC:3.A.1  |
| P73_2501 | chromate transporter                                               | TC:2.A.51 |
| P73_2503 | polyamine ABC transporter substrate-binding protein                | TC:3.A.1  |
| P73_2504 | membrane protein                                                   | TC:9.A.29 |
| P73_2520 | MFS transporter                                                    | TC:2.A.1  |
| P73_2541 | major facilitator superfamily protein                              | TC:2.A.1  |
| P73_2545 | ABC transporter substrate-binding protein                          | TC:3.A.1  |
| P73_2561 | phosphate transporter ATP-binding protein                          | TC:3.A.1  |
| P73_2562 | phosphate ABC transporter permease                                 | TC:3.A.1  |
| P73_2563 | phosphate ABC transporter permease                                 | TC:3.A.1  |
| P73_2564 | phosphate ABC transporter substrate-binding protein                | TC:3.A.1  |
| P73_2573 | extracellular ligand-binding receptor                              | TC:3.A.1  |
| P73_2574 | ABC transporter                                                    | TC:3.A.1  |
| P73_2575 | branched-chain amino acid ABC transporter ATP-binding protein LivF | TC:3.A.1  |
| P73_2576 | branched-chain amino acid ABC transporter permease                 | TC:3.A.1  |
| P73_2577 | inner-membrane translocator                                        | TC:3.A.1  |
| P73_2590 | Disulfide bond formation protein DsbB                              | TC:5.A.2  |
| P73_2615 | surface antigen (D15)                                              | TC:1.B.33 |
| P73_2632 | Putative Mg <sup>2+</sup> and Co <sup>2+</sup> transporter CorB    | TC:9.A.40 |
| P73_2642 | molybdate ABC transporter ATP-binding protein                      | TC:3.A.1  |
| P73_2643 | molybdate ABC transporter permease protein                         | TC:3.A.1  |
| P73_2644 | ABC molybdate transporter, periplasmic binding protein ModA        | TC:3.A.1  |
| P73_2650 | Uncharacterized homolog of Blt101                                  | TC:9.B.12 |
| P73_2653 | ABC transporter ATPase                                             | TC:3.A.1  |
| P73_2654 | multiple antibiotic resistance (MarC)-like proteins                | TC:2.A.95 |
| P73_2658 | YjgP/YjgQ family permease                                          | TC:1.B.42 |
| P73_2659 | permease YjgP/YjgQ family protein                                  | TC:1.B.42 |
| P73_2660 | organic solvent tolerance protein                                  | TC:1.B.42 |
| P73_2671 | holdfast attachment protein C                                      | TC:3.A.1  |
| P73_2675 | SmpA/OmlA domain-containing protein                                | TC:1.B.33 |
| P73_2675 | SmpA/OmlA domain-containing protein                                | TC:9.B.85 |
| P73_2689 | Na(+):H(+) antiporter                                              | TC:2.A.36 |
| P73_2700 | acriflavin resistance protein                                      | TC:2.A.6  |
| P73_2711 | sodium/hydrogen exchanger                                          | TC:2.A.37 |
| P73_2721 | conjugation TrbI family protein                                    | TC:3.A.7  |
| P73_2722 | conjugal transfer protein TrbG/VirB9/CagX                          | TC:3.A.7  |
| P73_2723 | conjugal transfer protein TrbF                                     | TC:3.A.7  |
| P73_2724 | conjugal transfer protein TrbL                                     | TC:3.A.7  |
| P73_2727 | conjugal transfer ATPase TrbE                                      | TC:3.A.7  |
| P73_2728 | conjugal transfer protein TrbB                                     | TC:3.A.7  |
| P73_2729 | conjugal transfer protein TrbC                                     | TC:3.A.7  |
| P73_2731 | major facilitator superfamily protein                              | TC:2.A.1  |

|          |                                                                                         |           |
|----------|-----------------------------------------------------------------------------------------|-----------|
| P73_2737 | Uncharacterized conserved protein                                                       | TC:9.B.36 |
| P73_2745 | conjugal transfer coupling protein TraG                                                 | TC:3.A.7  |
| P73_2779 | K <sup>+</sup> -dependent Na <sup>+</sup> /Ca <sup>+</sup> exchanger related-protein    | TC:2.A.19 |
| P73_2798 | Di- and tricarboxylate transporters                                                     | TC:2.A.47 |
| P73_2813 | oligopeptide/dipeptide ABC transporter, ATPase subunit                                  | TC:3.A.1  |
| P73_2814 | oligopeptide/dipeptide ABC transporter ATP-binding protein                              | TC:3.A.1  |
| P73_2815 | agropinic acid ABC transporter permease                                                 | TC:3.A.1  |
| P73_2816 | peptide ABC transporter                                                                 | TC:3.A.1  |
| P73_2825 | BioY protein                                                                            | TC:2.A.88 |
| P73_2831 | exported protein (TRAP-type transport system, periplasmic component)                    | TC:2.A.56 |
| P73_2832 | TRAP C4-dicarboxylate transport system subunit DctQ                                     | TC:2.A.56 |
| P73_2833 | TRAP transporter, DctM subunit                                                          | TC:2.A.56 |
| P73_2836 | C4-dicarboxylate-binding periplasmic protein                                            | TC:2.A.56 |
| P73_2837 | putative DctQ (C4-dicarboxylate permease, small subunit)                                | TC:2.A.56 |
| P73_2838 | Putative TRAP transporter large permease protein                                        | TC:2.A.56 |
| P73_2843 | Lipoprotein, YaeC family                                                                | TC:3.A.1  |
| P73_2844 | ABC-type metal ion transport system, permease component                                 | TC:3.A.1  |
| P73_2845 | NLPA lipoprotein                                                                        | TC:3.A.1  |
| P73_2851 | peptide ABC transporter ATPase                                                          | TC:3.A.1  |
| P73_2852 | binding-protein-dependent transport system inner membrane protein                       | TC:3.A.1  |
| P73_2853 | binding-protein-dependent transport system inner membrane protein                       | TC:3.A.1  |
| P73_2854 | extracellular solute-binding protein                                                    | TC:3.A.1  |
| P73_2867 | permease                                                                                | TC:2.A.1  |
| P73_2872 | ABC transporter                                                                         | TC:3.A.1  |
| P73_2873 | binding-protein-dependent transporters inner membrane component                         | TC:3.A.1  |
| P73_2883 | heavy metal translocating P-type ATPase                                                 | TC:3.A.3  |
| P73_2890 | xylose ABC transporter ATP-binding protein XylG                                         | TC:3.A.1  |
| P73_2891 | Inner-membrane translocator                                                             | TC:3.A.1  |
| P73_2892 | D-xylose-binding periplasmic protein XylF                                               | TC:3.A.1  |
| P73_2898 | sulfate permease                                                                        | TC:2.A.53 |
| P73_2948 | TRAP C4-dicarboxylate transport system permease DctM                                    | TC:2.A.56 |
| P73_2949 | TRAP-type mannitol/chloroaromatic compound transport system small permease-like protein | TC:2.A.56 |
| P73_2950 | twin-arginine translocation pathway signal                                              | TC:2.A.56 |
| P73_2962 | EamA-like transporter family                                                            | TC:2.A.7  |
| P73_2969 | TRAP transporter, 4TM/12TM fusion protein                                               | TC:2.A.56 |
| P73_2974 | TRAP-type C4-dicarboxylate transport system, periplasmic component                      | TC:2.A.56 |
| P73_2975 | TrapT family protein                                                                    | TC:2.A.56 |
| P73_2976 | TRAP-T family transporter, DctQ (4 TMs) subunit                                         | TC:2.A.56 |
| P73_2986 | putative periplasmic binding protein                                                    | TC:2.A.56 |
| P73_3011 | surface presentation of antigens (SPOA) protein                                         | TC:3.A.6  |
| P73_3021 | binding-protein-dependent transport systems inner membrane component                    | TC:3.A.1  |
| P73_3022 | binding-protein-dependent transport systems inner membrane component                    | TC:3.A.1  |

|          |                                                                      |           |
|----------|----------------------------------------------------------------------|-----------|
| P73_3023 | ABC nitrate transporter, nucleotide binding/ATPase protein           | TC:3.A.1  |
| P73_3050 | ABC transporter-like protein                                         | TC:3.A.1  |
| P73_3051 | binding-protein-dependent transport system inner membrane protein    | TC:3.A.1  |
| P73_3060 | RND family efflux transporter MFP subunit                            | TC:8.A.1  |
| P73_3061 | hydrophobe/amphiphile efflux-1 (HAE1) family protein                 | TC:2.A.6  |
| P73_3071 | polysaccharide biosynthesis protein                                  | TC:2.A.66 |
| P73_3078 | putative exopolysaccharide production protein                        | TC:1.B.18 |
| P73_3084 | succinoglycan biosynthesis transport protein exoP                    | TC:8.A.3  |
| P73_3086 | TonB-dependent receptor                                              | TC:1.B.14 |
| P73_3087 | periplasmic binding protein                                          | TC:3.A.1  |
| P73_3088 | transport system permease                                            | TC:3.A.1  |
| P73_3089 | ABC transporter                                                      | TC:3.A.1  |
| P73_3104 | binding-protein-dependent transport system inner membrane protein    | TC:3.A.1  |
| P73_3105 | family 5 extracellular solute-binding protein                        | TC:3.A.1  |
| P73_3107 | oligopeptide/dipeptide ABC transporter ATPase                        | TC:3.A.1  |
| P73_3108 | oligopeptide/dipeptide ABC transporter ATPase                        | TC:3.A.1  |
| P73_3109 | binding-protein-dependent transport systems inner membrane component | TC:3.A.1  |
| P73_3115 | binding-protein-dependent transport system inner membrane protein    | TC:3.A.1  |
| P73_3116 | binding-protein-dependent transport system inner membrane protein    | TC:3.A.1  |
| P73_3117 | oligopeptide/dipeptide ABC transporter ATPase                        | TC:3.A.1  |
| P73_3118 | oligopeptide/dipeptide ABC transporter ATPase                        | TC:3.A.1  |
| P73_3119 | twin-arginine translocation pathway signal                           | TC:3.A.1  |
| P73_3124 | extracellular solute-binding protein                                 | TC:3.A.1  |
| P73_3125 | binding-protein-dependent transport system inner membrane protein    | TC:3.A.1  |
| P73_3126 | spermidine/putrescine ABC transporter permease                       | TC:3.A.1  |
| P73_3127 | ABC transporter-like protein                                         | TC:3.A.1  |
| P73_3134 | ABC transporter substrate-binding protein                            | TC:3.A.1  |
| P73_3136 | glutathione import ATP-binding protein GsiA                          | TC:3.A.1  |
| P73_3137 | peptide ABC transporter permease                                     | TC:3.A.1  |
| P73_3138 | glutathione transport system permease GsiD                           | TC:3.A.1  |
| P73_3147 | ABC transporter-like protein                                         | TC:3.A.1  |
| P73_3148 | binding-protein-dependent transporter inner membrane component       | TC:3.A.1  |
| P73_3159 | auxin efflux carrier                                                 | TC:2.A.69 |
| P73_3192 | voltage-gated CIC-type chloride channel                              | TC:2.A.49 |
| P73_3206 | cell division protein FtsW                                           | TC:9.B.3  |
| P73_3224 | EmrB/QacA family drug resistance transporter                         | TC:2.A.1  |
| P73_3226 | inner membrane transport protein                                     | TC:2.A.46 |
| P73_3230 | Outer membrane autotransporter barrel                                | TC:1.B.12 |
| P73_3250 | TraG/TraD family protein                                             | TC:3.A.7  |
| P73_3275 | glutathione-regulated potassium-efflux system protein                | TC:2.A.37 |
| P73_3303 | capsular polysaccharide export protein KpsS                          | TC:9.A.41 |
| P73_3304 | polysaccharide biosynthesis/export family protein                    | TC:1.B.18 |
| P73_3305 | capsular polysaccharide export protein KpsC                          | TC:9.A.41 |

|          |                                                                        |           |
|----------|------------------------------------------------------------------------|-----------|
| P73_3355 | ABC transporter ATP-binding protein                                    | TC:3.A.1  |
| P73_3356 | lipoprotein releasing system transmembrane protein                     | TC:3.A.1  |
| P73_3359 | permease                                                               | TC:2.A.86 |
| P73_3367 | Na <sup>+</sup> /H <sup>+</sup> antiporter NhaA                        | TC:2.A.33 |
| P73_3378 | multidrug resistance protein                                           | TC:2.A.1  |
| P73_3383 | binding-protein-dependent transport systems inner membrane component   | TC:3.A.1  |
| P73_3403 | ABC transporter                                                        | TC:3.A.1  |
| P73_3414 | Sec-independent protein translocase TatC                               | TC:2.A.64 |
| P73_3415 | twin-arginine translocation protein, TatB subunit                      | TC:2.A.64 |
| P73_3416 | Sec-independent translocation protein mttA/Hcf106                      | TC:2.A.64 |
| P73_3418 | ABC transporter                                                        | TC:3.A.1  |
| P73_3429 | NADH:ubiquinone oxidoreductase subunit N                               | TC:3.D.1  |
| P73_3430 | NADH:ubiquinone oxidoreductase subunit M                               | TC:3.D.1  |
| P73_3431 | NADH:ubiquinone oxidoreductase subunit L                               | TC:3.D.1  |
| P73_3432 | NADH:ubiquinone oxidoreductase subunit K                               | TC:3.D.1  |
| P73_3433 | NADH:ubiquinone oxidoreductase subunit J                               | TC:3.D.1  |
| P73_3435 | NADH dehydrogenase subunit I                                           | TC:3.D.1  |
| P73_3436 | NADH:ubiquinone oxidoreductase subunit H                               | TC:3.D.1  |
| P73_3438 | NADH dehydrogenase subunit G                                           | TC:5.A.3  |
| P73_3441 | NADH dehydrogenase I subunit F                                         | TC:3.D.1  |
| P73_3444 | NADH dehydrogenase subunit E                                           | TC:3.D.1  |
| P73_3445 | NADH dehydrogenase subunit D                                           | TC:3.D.1  |
| P73_3447 | NADH dehydrogenase subunit C                                           | TC:3.D.1  |
| P73_3448 | NADH dehydrogenase subunit B                                           | TC:3.D.1  |
| P73_3449 | NADH:ubiquinone oxidoreductase subunit A                               | TC:3.D.1  |
| P73_3459 | NAD(P) transhydrogenase subunit beta                                   | TC:3.D.2  |
| P73_3483 | cation transporter                                                     | TC:2.A.38 |
| P73_3489 | EamA-like transporter family                                           | TC:2.A.7  |
| P73_3490 | MgtC/SapB transporter                                                  | TC:9.B.20 |
| P73_3492 | signal recognition particle-docking protein FtsY                       | TC:3.A.5  |
| P73_3503 | HflC protein                                                           | TC:8.A.21 |
| P73_3504 | Protein HflK                                                           | TC:8.A.21 |
| P73_3514 | preprotein translocase subunit SecG                                    | TC:3.A.5  |
| P73_3520 | ABC transporter                                                        | TC:3.A.1  |
| P73_3521 | His/Glu/Gln/Arg/opine family ABC transporter substrate-binding protein | TC:3.A.1  |
| P73_3522 | binding-protein-dependent transport system inner membrane protein      | TC:3.A.1  |
| P73_3523 | histidine transport system permease protein                            | TC:3.A.1  |
| P73_3549 | MATE efflux family protein                                             | TC:2.A.66 |
| P73_3555 | EamA-like transporter family                                           | TC:2.A.7  |
| P73_3570 | MscS mechanosensitive ion channel                                      | TC:1.A.23 |
| P73_3583 | ABC transporter ATP-binding protein                                    | TC:3.A.1  |
| P73_3588 | surface antigen (D15)                                                  | TC:1.B.33 |
| P73_3589 | Uncharacterized protein conserved in bacteria                          | TC:9.B.22 |

|          |                                                                  |           |
|----------|------------------------------------------------------------------|-----------|
| P73_3599 | molecular chaperone DnaK                                         | TC:1.A.33 |
| P73_3646 | F0F1 ATP synthase subunit epsilon                                | TC:3.A.2  |
| P73_3647 | F0F1 ATP synthase subunit beta                                   | TC:3.A.2  |
| P73_3648 | F0F1 ATP synthase subunit gamma                                  | TC:3.A.2  |
| P73_3649 | F0F1 ATP synthase subunit alpha                                  | TC:3.A.2  |
| P73_3650 | ATP synthase subunit delta                                       | TC:3.A.2  |
| P73_3655 | Flagellar motor protein                                          | TC:1.A.30 |
| P73_3666 | TonB-dependent receptor plug                                     | TC:1.B.14 |
| P73_3668 | periplasmic binding protein                                      | TC:3.A.1  |
| P73_3669 | ABC transporter permease                                         | TC:3.A.1  |
| P73_3670 | hemin importer ATP-binding subunit                               | TC:3.A.1  |
| P73_3688 | TonB-dependent receptor                                          | TC:1.B.14 |
| P73_3699 | rod shape-determining protein RodA                               | TC:9.B.3  |
| P73_3703 | Na <sup>+</sup> /H <sup>+</sup> antiporter NhaA                  | TC:2.A.33 |
| P73_3704 | capsule polysaccharide export ATP-binding protein KpsT           | TC:3.A.1  |
| P73_3705 | capsule polysaccharide export                                    | TC:8.A.4  |
| P73_3706 | Na/Pi-cotransporter II-like protein                              | TC:2.A.58 |
| P73_3707 | OmpA/MotB domain-containing protein                              | TC:1.A.30 |
| P73_3712 | Uncharacterized protein conserved in bacteria                    | TC:2.A.80 |
| P73_3714 | Uncharacterized protein conserved in bacteria                    | TC:2.A.80 |
| P73_3718 | TRAP transporter solute receptor, TAXI family protein            | TC:2.A.56 |
| P73_3719 | TRAP transporter 4TM/12TM fusion protein                         | TC:2.A.56 |
| P73_3724 | ATP synthase F1 subunit gamma                                    | TC:3.A.2  |
| P73_3725 | ATP synthase F1 subunit alpha                                    | TC:3.A.2  |
| P73_3726 | ATP synthase F0 subunit B                                        | TC:3.A.2  |
| P73_3727 | F0F1 ATP synthase subunit C                                      | TC:3.A.2  |
| P73_3728 | F0F1 ATP synthase subunit A                                      | TC:3.A.2  |
| P73_3731 | ATP synthase F1 subunit epsilon                                  | TC:3.A.2  |
| P73_3732 | F0F1 ATP synthase subunit beta                                   | TC:3.A.2  |
| P73_3737 | TRAP dicarboxylate transporter DctM subunit                      | TC:2.A.56 |
| P73_3738 | TRAP transporter DctQ-like subunit                               | TC:2.A.56 |
| P73_3739 | 2,3-diketo-L-gulonate-binding periplasmic protein                | TC:2.A.56 |
| P73_3743 | TRAP dicarboxylate transporter subunit DctM                      | TC:2.A.56 |
| P73_3744 | TRAP dicarboxylate transporter subunit DctQ                      | TC:2.A.56 |
| P73_3745 | TRAP dicarboxylate transporter subunit DctP                      | TC:2.A.56 |
| P73_3750 | Extracellular solute-binding protein, family 5 precursor         | TC:3.A.1  |
| P73_3751 | oligopeptide/dipeptide ABC transporter ATPase                    | TC:3.A.1  |
| P73_3752 | peptide ABC transporter ATPase                                   | TC:3.A.1  |
| P73_3753 | peptide/opine ABC transporter inner membrane protein             | TC:3.A.1  |
| P73_3754 | peptide/opine ABC transporter inner membrane protein             | TC:3.A.1  |
| P73_3774 | ABC transporter substrate binding protein (glycerol-3-phosphate) | TC:3.A.1  |
| P73_3775 | ABC transporter membrane spanning protein (glycerol-3-phosphate) | TC:3.A.1  |
| P73_3776 | ABC transporter membrane spanning protein (glycerol-3-phosphate) | TC:3.A.1  |

|          |                                                                                |           |
|----------|--------------------------------------------------------------------------------|-----------|
| P73_3778 | ABC transporter nucleotide binding/ATPase (glycerol-3-phosphate)               | TC:3.A.1  |
| P73_3784 | ACR3 family arsenite efflux pump                                               | TC:2.A.59 |
| P73_3788 | major facilitator transporter                                                  | TC:2.A.1  |
| P73_3791 | cation efflux protein                                                          | TC:2.A.4  |
| P73_3808 | ABC transporter                                                                | TC:3.A.1  |
| P73_3809 | putative ABC type branched chain amino acid transport system                   | TC:3.A.1  |
| P73_3810 | sugar ABC transporter permease                                                 | TC:3.A.1  |
| P73_3811 | bmp family protein                                                             | TC:3.A.1  |
| P73_3819 | ferrous-iron efflux pump FieF                                                  | TC:2.A.4  |
| P73_3833 | branched-chain amino acid ABC transporter periplasmic component-like protein   | TC:3.A.1  |
| P73_3835 | integral membrane protein MviN                                                 | TC:2.A.66 |
| P73_3836 | Uncharacterized membrane protein (homolog of Drosophila rhomboid)              | TC:3.A.1  |
| P73_3843 | sugar ABC transporter substrate-binding protein                                | TC:3.A.1  |
| P73_3844 | ribose import ATP-binding protein                                              | TC:3.A.1  |
| P73_3845 | integral inner-membrane protein                                                | TC:3.A.1  |
| P73_3846 | inner-membrane translocator                                                    | TC:3.A.1  |
| P73_3847 | Predicted permeases                                                            | TC:9.A.29 |
| P73_3860 | succinate dehydrogenase iron-sulfur subunit                                    | TC:5.A.4  |
| P73_3862 | succinate dehydrogenase flavoprotein subunit                                   | TC:5.A.4  |
| P73_3864 | succinate dehydrogenase subunit C                                              | TC:5.A.4  |
| P73_3869 | Predicted permeases                                                            | TC:9.A.29 |
| P73_3885 | ABC transporter                                                                | TC:3.A.1  |
| P73_3886 | ABC-transporter ATP-binding component                                          | TC:3.A.1  |
| P73_3887 | nitrate/sulfonate/bicarbonate ABC transporter permease                         | TC:3.A.1  |
| P73_3899 | sodium/solute symporter family protein                                         | TC:2.A.21 |
| P73_3905 | copper-transporting P-type ATPase ActP                                         | TC:3.A.3  |
| P73_3910 | transthyretin                                                                  | TC:9.B.35 |
| P73_3914 | TRAP-type C4-dicarboxylate transport system periplasmic component-like protein | TC:3.A.1  |
| P73_3915 | ABC-type antimicrobial peptide transport system, ATPase component              | TC:3.A.1  |
| P73_3918 | ABC-type Fe <sup>3+</sup> transport system permease component                  | TC:3.A.1  |
| P73_3930 | curli production assembly/transport component CsgG                             | TC:1.B.48 |
| P73_3932 | major facilitator superfamily transporter                                      | TC:2.A.1  |
| P73_3936 | TRAP dicarboxylate transporter subunit DctP                                    | TC:2.A.56 |
| P73_3937 | tripartite AtP-independent periplasmic transporter subunit DctQ                | TC:2.A.56 |
| P73_3938 | TRAP dicarboxylate transporter subunit DctM                                    | TC:2.A.56 |
| P73_3947 | ABC transporter, nucleotide binding/ATPase protein                             | TC:3.A.1  |
| P73_3948 | binding-protein-dependent transport system inner membrane protein              | TC:3.A.1  |
| P73_3949 | ABC transporter, membrane spanning protein                                     | TC:3.A.1  |
| P73_3950 | extracellular solute-binding protein                                           | TC:3.A.1  |
| P73_3963 | tetrahydromethanopterin S-methyltransferase subunit H                          | TC:3.C.1  |
| P73_3971 | major facilitator family protein                                               | TC:2.A.1  |
| P73_3982 | efflux transporter inner membrane protein                                      | TC:2.A.66 |

|          |                                                                                     |           |
|----------|-------------------------------------------------------------------------------------|-----------|
| P73_3985 | ABC-type cobalamin/Fe <sup>3+</sup> -siderophore transport system, ATPase component | TC:3.A.1  |
| P73_3986 | transport system permease                                                           | TC:3.A.1  |
| P73_3987 | ferric siderophore ABC transporter membrane protein                                 | TC:3.A.1  |
| P73_3988 | periplasmic binding protein                                                         | TC:3.A.1  |
| P73_3989 | ferrichrome receptor precursor protein                                              | TC:1.B.14 |
| P73_3999 | binding-protein-dependent transport systems inner membrane component                | TC:3.A.1  |
| P73_4001 | maltose ABC transporter transmembrane protein                                       | TC:3.A.1  |
| P73_4002 | extracellular solute-binding protein family 1                                       | TC:3.A.1  |
| P73_4003 | putative sugar ABC transporter, ATP-binding protein                                 | TC:3.A.1  |
| P73_4006 | tripartite ATP-independent periplasmic transporter DctQ component                   | TC:2.A.56 |
| P73_4007 | TRAP dicarboxylate transporter subunit DctP                                         | TC:2.A.56 |
| P73_4008 | Sialic acid TRAP transporter permease protein siaT                                  | TC:2.A.56 |
| P73_4025 | sugar ABC transporter                                                               | TC:3.A.1  |
| P73_4026 | binding-protein-dependent transport systems inner membrane component                | TC:3.A.1  |
| P73_4027 | binding-protein-dependent transport systems inner membrane component                | TC:3.A.1  |
| P73_4028 | extracellular solute-binding protein family 1 protein                               | TC:3.A.1  |
| P73_4031 | peptide ABC transporter ATP-binding protein                                         | TC:3.A.1  |
| P73_4032 | ABC transporter permease                                                            | TC:3.A.1  |
| P73_4033 | ABC transporter, membrane spanning protein (peptide)                                | TC:3.A.1  |
| P73_4034 | ABC transporter substrate binding protein                                           | TC:3.A.1  |
| P73_4035 | oligopeptide ABC transporter substrate binding protein                              | TC:3.A.1  |
| P73_4041 | ABC transporter substrate binding protein                                           | TC:2.A.56 |
| P73_4042 | TRAP dicarboxylate transporter subunit DctM                                         | TC:2.A.56 |
| P73_4047 | Predicted membrane protein                                                          | TC:2.A.7  |
| P73_4049 | family 5 extracellular solute-binding protein                                       | TC:3.A.1  |
| P73_4050 | binding-protein-dependent transporters inner membrane component                     | TC:3.A.1  |
| P73_4051 | binding-protein-dependent transporters inner membrane component                     | TC:3.A.1  |
| P73_4052 | ABC transporter                                                                     | TC:3.A.1  |
| P73_4056 | acetyltransferase                                                                   | TC:8.A.3  |
| P73_4058 | Periplasmic protein involved in polysaccharide export                               | TC:1.B.18 |
| P73_4065 | polysaccharide biosynthesis protein                                                 | TC:2.A.66 |
| P73_4074 | nitrate/sulfonate/bicarbonate ABC transporter ATPase                                | TC:3.A.1  |
| P73_4075 | ABC transporter permease                                                            | TC:3.A.1  |
| P73_4081 | binding-protein-dependent transport system inner membrane protein                   | TC:3.A.1  |
| P73_4082 | putative sulfonate ABC transporter ATP-binding protein                              | TC:3.A.1  |
| P73_4090 | putative cystine-binding periplasmic protein                                        | TC:3.A.1  |
| P73_4091 | ABC transporter substrate binding protein                                           | TC:3.A.1  |
| P73_4092 | ABC transporter ATPase                                                              | TC:3.A.1  |
| P73_4097 | outer membrane receptor for ferrienterochelin and colicins                          | TC:1.B.14 |
| P73_4103 | transport protein                                                                   | TC:2.A.56 |
| P73_4104 | TRAP-type transport system, small permease                                          | TC:2.A.56 |
| P73_4105 | TRAP transporter, DctM subunit                                                      | TC:2.A.56 |
| P73_4110 | transmembrane protein                                                               | TC:2.A.80 |



|          |                                                                                             |           |
|----------|---------------------------------------------------------------------------------------------|-----------|
| P73_4111 | Uncharacterized protein conserved in bacteria                                               | TC:2.A.80 |
| P73_4115 | ABC transporter                                                                             | TC:3.A.1  |
| P73_4116 | binding-protein-dependent transport system inner membrane protein                           | TC:3.A.1  |
| P73_4120 | type II and III secretion system protein                                                    | TC:1.B.22 |
| P73_4137 | outer membrane assembly factor                                                              | TC:1.B.33 |
| P73_4138 | Type I secretion membrane fusion protein, HlyD                                              | TC:8.A.1  |
| P73_4139 | ABC transporter-like protein                                                                | TC:3.A.1  |
| P73_4140 | Outer membrane protein                                                                      | TC:1.B.17 |
| P73_4144 | ABC transporter                                                                             | TC:3.A.1  |
| P73_4146 | ABC transporter-like protein                                                                | TC:3.A.1  |
| P73_4147 | Fe <sup>3+</sup> siderophore ABC transporter permease                                       | TC:3.A.1  |
| P73_4148 | transport system permease                                                                   | TC:3.A.1  |
| P73_4149 | ferric enterobactin-binding periplasmic protein FepB                                        | TC:3.A.1  |
| P73_4150 | TonB-dependent siderophore receptor                                                         | TC:1.B.14 |
| P73_4161 | oligopeptide/dipeptide ABC transporter ATPase                                               | TC:3.A.1  |
| P73_4162 | oligopeptide/dipeptide ABC transporter ATPase                                               | TC:3.A.1  |
| P73_4163 | binding-protein-dependent transport system inner membrane protein                           | TC:3.A.1  |
| P73_4164 | peptide ABC transporter permease                                                            | TC:3.A.1  |
| P73_4165 | extracellular solute-binding protein                                                        | TC:3.A.1  |
| P73_4166 | ABC transporter-like protein                                                                | TC:3.A.1  |
| P73_4167 | binding-protein-dependent transport systems inner membrane component                        | TC:3.A.1  |
| P73_4168 | binding-protein-dependent transport system inner membrane protein                           | TC:3.A.1  |
| P73_4169 | family 1 extracellular solute-binding protein                                               | TC:3.A.1  |
| P73_4171 | ABC transporter-like protein                                                                | TC:3.A.1  |
| P73_4172 | ABC transporter-like protein                                                                | TC:3.A.1  |
| P73_4173 | branched-chain amino acid ABC transporter permease                                          | TC:3.A.1  |
| P73_4174 | branched-chain amino acid ABC transporter permease                                          | TC:3.A.1  |
| P73_4175 | branched-chain amino acid ABC transporter substrate-binding protein                         | TC:3.A.1  |
| P73_4177 | ABC transporter ATP-binding protein                                                         | TC:3.A.1  |
| P73_4180 | copper-translocating P-type ATPase                                                          | TC:3.A.3  |
| P73_4201 | ABC peptide transporter                                                                     | TC:3.A.1  |
| P73_4204 | oligopeptide/dipeptide uptake family ABC transporter, periplasmic substrate-binding protein | TC:3.A.1  |
| P73_4211 | ABC transporter-like protein                                                                | TC:3.A.1  |
| P73_4212 | binding-protein-dependent transport system inner membrane protein                           | TC:3.A.1  |
| P73_4226 | large-conductance mechanosensitive channel                                                  | TC:1.A.22 |
| P73_4247 | cell division protein FtsX                                                                  | TC:3.A.1  |
| P73_4248 | cell division ATP-binding protein FtsE                                                      | TC:3.A.1  |
| P73_4257 | Predicted permeases                                                                         | TC:2.A.7  |
| P73_4267 | AzlC family protein                                                                         | TC:2.A.78 |
| P73_4268 | AzID branched-chain amino acid transport                                                    | TC:2.A.78 |
| P73_4276 | AcrB/AcrD/AcrF family transporter                                                           | TC:2.A.6  |
| P73_4297 | Na <sup>+</sup> /Ca <sup>+</sup> antiporter                                                 | TC:2.A.19 |

|          |                                                                           |           |
|----------|---------------------------------------------------------------------------|-----------|
| P73_4302 | zinc import ATP-binding protein ZnuC                                      | TC:3.A.1  |
| P73_4303 | zinc ABC transporter permease                                             | TC:3.A.1  |
| P73_4306 | ABC transporter ATP-binding protein                                       | TC:3.A.1  |
| P73_4307 | ABC transporter permease y4oR                                             | TC:3.A.1  |
| P73_4308 | sorbitol/mannitol transport system permease protein                       | TC:3.A.1  |
| P73_4309 | extracellular solute-binding protein                                      | TC:3.A.1  |
| P73_4322 | lipopolysaccharide biosynthesis family protein                            | TC:8.A.3  |
| P73_4372 | Oxidoreductase alpha (Molybdopterin) subunit                              | TC:5.A.3  |
| P73_4377 | binding-protein-dependent transport system inner membrane protein         | TC:3.A.1  |
| P73_4378 | Binding-protein-dependent transport system inner membrane component       | TC:3.A.1  |
| P73_4401 | transmembrane protein                                                     | TC:2.A.56 |
| P73_4402 | tripartite ATP-independent periplasmic transporter DctQ                   | TC:2.A.56 |
| P73_4403 | TRAP-type C4-dicarboxylate transport system, periplasmic component        | TC:2.A.56 |
| P73_4405 | NAD(P) transhydrogenase subunit beta                                      | TC:3.D.2  |
| P73_4406 | MFS permease                                                              | TC:2.A.1  |
| P73_4409 | ABC transporter permease                                                  | TC:3.A.1  |
| P73_4410 | ABC transporter substrate-binding protein                                 | TC:3.A.1  |
| P73_4411 | ABC transporter                                                           | TC:3.A.1  |
| P73_4413 | ribose ABC transporter ATP-binding protein                                | TC:3.A.1  |
| P73_4417 | choline/carnitine/betaine transporter                                     | TC:2.A.15 |
| P73_4433 | binding-protein-dependent transport system inner membrane protein         | TC:3.A.1  |
| P73_4434 | ABC transporter                                                           | TC:3.A.1  |
| P73_4438 | branched-chain amino acid ABC transporter permease                        | TC:3.A.1  |
| P73_4439 | inner-membrane translocator                                               | TC:3.A.1  |
| P73_4440 | amino acid ABC transporter ATP-binding protein                            | TC:3.A.1  |
| P73_4441 | branched chain amino acid ABC transporter ATPase                          | TC:3.A.1  |
| P73_4442 | putative branched-chain amino acid ABC transporter, periplasmic component | TC:3.A.1  |
| P73_4444 | TRAP-type C4-dicarboxylate transport system, periplasmic component        | TC:2.A.56 |
| P73_4453 | AMP-dependent synthetase and ligase                                       | TC:4.C.1  |
| P73_4456 | TRAP-T family protein transporter, DctP (Periplasmic binding) subunit     | TC:2.A.56 |
| P73_4461 | putative permease, DMT superfamily protein                                | TC:2.A.7  |
| P73_4468 | TRAP-T family protein transporter, DctM (12 TMs) subunit                  | TC:2.A.56 |
| P73_4469 | TRAP-type C4-dicarboxylate transport system, small permease component     | TC:2.A.56 |
| P73_4470 | TRAP-T family protein transporter, DctP (Periplasmic binding) subunit     | TC:2.A.56 |
| P73_4481 | AMP-dependent synthetase and ligase                                       | TC:4.C.1  |
| P73_4503 | TRAP dicarboxylate transporter- DctP subunit                              | TC:2.A.56 |
| P73_4504 | TRAP dicarboxylate transporter subunit DctM                               | TC:2.A.56 |
| P73_4505 | TRAP-type C4-dicarboxylate transport system, small permease component     | TC:2.A.56 |
| P73_4506 | ABC ribose transporter, periplasmic solute-binding protein                | TC:3.A.1  |
| P73_4507 | inner-membrane translocator                                               | TC:3.A.1  |
| P73_4508 | ABC transporter-like protein                                              | TC:3.A.1  |
| P73_4532 | oxidoreductase, flavocytochrome subunit                                   | TC:5.B.1  |
| P73_4532 | oxidoreductase, flavocytochrome subunit                                   | TC:9.B.43 |

|          |                                                                          |           |
|----------|--------------------------------------------------------------------------|-----------|
| P73_4537 | ATPase P                                                                 | TC:3.A.3  |
| P73_4538 | Uncharacterized membrane protein                                         | TC:2.A.89 |
| P73_4557 | Uncharacterized membrane protein (homolog of <i>Drosophila</i> rhomboid) | TC:3.A.1  |
| P73_4566 | Type IV secretory pathway, VirD4 components                              | TC:3.A.7  |
| P73_4571 | TrbL/VirB6 plasmid conjugal transfer protein                             | TC:3.A.7  |
| P73_4575 | conjugation TrbI family protein                                          | TC:3.A.7  |
| P73_4576 | conjugal transfer protein TrbG/VirB9/CagX                                | TC:3.A.7  |
| P73_4577 | VirB8 family protein                                                     | TC:3.A.7  |
| P73_4578 | Type IV secretion system proteins                                        | TC:3.A.7  |
| P73_4581 | CagE TrbE VirB component of type IV transporter system                   | TC:3.A.7  |
| P73_4582 | type IV secretory pathway VirB3 family protein                           | TC:3.A.7  |
| P73_4583 | conjugal transfer protein TrbC                                           | TC:3.A.7  |
| P73_4590 | cation diffusion facilitator family transporter                          | TC:2.A.4  |
| P73_4592 | cytochrome c biogenesis protein transmembrane region                     | TC:5.A.1  |
| P73_4596 | disulfide bond formation-like protein                                    | TC:5.A.2  |
| P73_4602 | zinc/iron permease                                                       | TC:2.A.5  |
| P73_4610 | phosphonate ABC transporter phosphate-binding periplasmic component      | TC:3.A.1  |
| P73_4611 | phosphonate/organophosphate ester transporter subunit                    | TC:3.A.1  |
| P73_4612 | phosphonate ABC transporter permease protein phnE                        | TC:3.A.1  |
| P73_4614 | heavy metal translocating P-type ATPase                                  | TC:3.A.3  |
| P73_4639 | cytochrome c-type biogenesis protein CcmF                                | TC:9.B.14 |
| P73_4645 | copper-translocating P-type ATPase                                       | TC:3.A.3  |
| P73_4709 | protein VirD4                                                            | TC:3.A.7  |
| P73_4710 | high-affinity nickel-transporter                                         | TC:2.A.52 |
| P73_4711 | type IV secretion system protein VirB6                                   | TC:3.A.7  |
| P73_4714 | type IV secretion system protein VirB10                                  | TC:3.A.7  |
| P73_4715 | conjugal transfer protein TrbG/VirB9/CagX                                | TC:3.A.7  |
| P73_4716 | type IV secretion system protein VirB8                                   | TC:3.A.7  |
| P73_4717 | Type IV secretion system proteins                                        | TC:3.A.7  |
| P73_4720 | type IV secretion system protein VirB                                    | TC:3.A.7  |
| P73_4721 | type IV secretory pathway virB3 protein                                  | TC:3.A.7  |
| P73_4722 | type IV secretion system protein VirB2                                   | TC:3.A.7  |
| P73_4731 | heavy metal translocating P-type ATPase                                  | TC:3.A.3  |
| P73_4745 | thiol:disulfide interchange protein DsbD 1 precursor                     | TC:5.A.1  |
| P73_4765 | TRAP dicarboxylate transporter subunit DctM                              | TC:2.A.56 |
| P73_4766 | TRAP dicarboxylate transporter subunit DctQ                              | TC:2.A.56 |
| P73_4767 | TRAP transporter solute receptor                                         | TC:2.A.56 |
| P73_4780 | TrbL/VirB6 plasmid conjugal transfer protein                             | TC:3.A.7  |
| P73_4790 | Membrane transport protein MerF                                          | TC:9.A.2  |
| P73_4790 | Membrane transport protein MerF                                          | TC:9.A.7  |
| P73_4792 | mercuric transporter MerT                                                | TC:9.A.2  |
| P73_4815 | virD4 protein, putative                                                  | TC:3.A.7  |
| P73_4821 | chromate transporter                                                     | TC:2.A.51 |

**Data S5 | Transcription genes in the P73<sup>T</sup> genome related to transcription (COG category K).**

| Locus Tag | Gene Product Name                                        | Function ID |
|-----------|----------------------------------------------------------|-------------|
| P73_0641  | DNA-directed RNA polymerase subunit beta ( EC:2.7.7.6 )  | COG0085     |
| P73_0642  | DNA-directed RNA polymerase subunit beta' ( EC:2.7.7.6 ) | COG0086     |
| P73_0257  | transcription elongation factor NusA                     | COG0195     |
| P73_0677  | DNA-directed RNA polymerase subunit alpha ( EC:2.7.7.6 ) | COG0202     |
| P73_0636  | NusG antitermination factor                              | COG0250     |
| P73_2440  | Transcription antiterminator                             | COG0250     |
| P73_4060  | Transcription antiterminator                             | COG0250     |
| P73_0602  | (P)ppGpp synthetase I, SpoT/RelA ( EC:2.7.6.5 )          | COG0317     |
| P73_3389  | urease accessory protein UreG                            | COG0378     |
| P73_2792  | putative ATP-dependent RNA helicase ( EC:3.6.4.13 )      | COG0513     |
| P73_3425  | ATP-dependent RNA helicase ( EC:3.6.4.13 )               | COG0513     |
| P73_3610  | putative ATP-dependent RNA helicase ( EC:3.6.4.13 )      | COG0513     |
| P73_4222  | DEAD/DEAH box helicase ( EC:3.6.4.13 )                   | COG0513     |
| P73_1853  | serine/threonine protein kinase                          | COG0515     |
| P73_1926  | serine/threonine protein kinase                          | COG0515     |
| P73_0053  | ribonuclease R ( EC:3.1.- )                              | COG0557     |
| P73_3291  | RNA polymerase factor sigma-32                           | COG0568     |
| P73_3314  | RNA polymerase sigma factor RpoD                         | COG0568     |
| P73_3824  | RNA polymerase factor sigma-32                           | COG0568     |
| P73_0608  | ribonuclease III ( EC:3.1.26.3 )                         | COG0571     |
| P73_0079  | protein GbuR                                             | COG0583     |
| P73_0157  | LysR family transcriptional regulator                    | COG0583     |
| P73_0160  | Transcriptional Regulator, LysR family protein           | COG0583     |
| P73_0332  | LysR family transcriptional regulator                    | COG0583     |
| P73_0495  | LysR family transcriptional regulator                    | COG0583     |
| P73_0508  | LysR family transcriptional regulator                    | COG0583     |
| P73_0546  | LysR family transcriptional regulator                    | COG0583     |
| P73_0749  | LysR family transcriptional regulator                    | COG0583     |
| P73_0840  | pca operon transcriptional activator PcaQ                | COG0583     |
| P73_0995  | LysR family transcriptional regulator                    | COG0583     |
| P73_1052  | LysR family transcriptional regulator                    | COG0583     |
| P73_1064  | LysR family transcriptional regulator                    | COG0583     |
| P73_1109  | LysR family transcriptional regulator                    | COG0583     |
| P73_1118  | LysR family transcriptional regulator                    | COG0583     |
| P73_1278  | LysR family transcriptional regulator                    | COG0583     |
| P73_1386  | LysR family transcriptional regulator                    | COG0583     |
| P73_1522  | LysR family transcriptional regulator                    | COG0583     |
| P73_1534  | chromosome replication initiation inhibitor protein      | COG0583     |

|          |                                             |         |
|----------|---------------------------------------------|---------|
| P73_1543 | LysR family transcriptional regulator       | COG0583 |
| P73_1559 | LysR family transcriptional regulator       | COG0583 |
| P73_1574 | LysR family transcriptional regulator       | COG0583 |
| P73_1616 | LysR family transcriptional regulator       | COG0583 |
| P73_1767 | LysR family transcriptional regulator       | COG0583 |
| P73_1994 | LysR family transcriptional regulator       | COG0583 |
| P73_2008 | LysR family transcriptional regulator       | COG0583 |
| P73_2028 | HTH-type transcriptional activator nahR     | COG0583 |
| P73_2029 | LysR family transcriptional regulator       | COG0583 |
| P73_2046 | LysR family transcriptional regulator       | COG0583 |
| P73_2060 | LysR family transcriptional regulator       | COG0583 |
| P73_2127 | LysR family transcriptional regulator       | COG0583 |
| P73_2144 | LysR family transcriptional regulator       | COG0583 |
| P73_2154 | transcriptional regulator                   | COG0583 |
| P73_2230 | LysR family transcriptional regulator       | COG0583 |
| P73_2234 | LysR family transcriptional regulator       | COG0583 |
| P73_2285 | LysR family transcriptional regulator       | COG0583 |
| P73_2368 | transcriptional regulator                   | COG0583 |
| P73_2596 | LysR family transcriptional regulator       | COG0583 |
| P73_2812 | LysR family transcription regulator protein | COG0583 |
| P73_2817 | LysR family transcriptional regulator       | COG0583 |
| P73_2842 | LysR family transcriptional regulator       | COG0583 |
| P73_3145 | Transcriptional regulator                   | COG0583 |
| P73_3528 | putative transcriptional regulator          | COG0583 |
| P73_3716 | transcriptional regulator                   | COG0583 |
| P73_3741 | LysR family transcription regulator protein | COG0583 |
| P73_3931 | LysR family transcriptional regulator       | COG0583 |
| P73_4010 | LysR family transcriptional regulator       | COG0583 |
| P73_4011 | LysR family transcriptional regulator       | COG0583 |
| P73_4018 | LysR family transcriptional regulator       | COG0583 |
| P73_4019 | LysR family transcriptional regulator       | COG0583 |
| P73_4030 | LysR family transcriptional regulator       | COG0583 |
| P73_4076 | LysR family transcriptional regulator       | COG0583 |
| P73_4517 | transcriptional regulator                   | COG0583 |
| P73_4756 | transcriptional regulator                   | COG0583 |
| P73_0751 | ArsR family transcriptional regulator       | COG0640 |
| P73_1255 | ArsR family transcriptional regulator       | COG0640 |
| P73_1552 | transcriptional regulator SoxR              | COG0640 |
| P73_1983 | arsR family transcriptional regulator       | COG0640 |
| P73_3787 | ArsR family transcriptional regulator       | COG0640 |
| P73_3790 | ArsR family transcriptional regulator       | COG0640 |
| P73_4045 | nodulation protein nolR                     | COG0640 |
| P73_0298 | DNA-binding response regulator PetR         | COG0745 |

|          |                                                                      |         |
|----------|----------------------------------------------------------------------|---------|
| P73_0381 | hypothetical protein                                                 | COG0745 |
| P73_0410 | two component transcriptional regulator                              | COG0745 |
| P73_0615 | two component transcriptional regulator                              | COG0745 |
| P73_2185 | response regulator receiver protein, CheY like protein               | COG0745 |
| P73_2559 | phosphate regulon transcriptional regulatory protein PhoB            | COG0745 |
| P73_2604 | two component transcriptional regulator                              | COG0745 |
| P73_3014 | response regulator receiver protein                                  | COG0745 |
| P73_3902 | response regulator receiver protein                                  | COG0745 |
| P73_4530 | Two component transcriptional regulator, winged helix family protein | COG0745 |
| P73_4636 | two component transcriptional regulator                              | COG0745 |
| P73_3298 | N utilization substance family protein                               | COG0781 |
| P73_4265 | transcription elongation factor GreA                                 | COG0782 |
| P73_0896 | MerR family transcriptional regulator                                | COG0789 |
| P73_0897 | MerR family transcriptional regulator                                | COG0789 |
| P73_1938 | MerR family transcriptional regulator                                | COG0789 |
| P73_2361 | MerR family regulatory protein                                       | COG0789 |
| P73_2681 | Predicted transcriptional regulators                                 | COG0789 |
| P73_2882 | MerR family transcriptional regulator                                | COG0789 |
| P73_4594 | MerR family transcriptional regulator                                | COG0789 |
| P73_4730 | MerR family transcriptional regulator                                | COG0789 |
| P73_4793 | putative heavy metal transcriptional regulator                       | COG0789 |
| P73_0869 | silent information regulator protein Sir2 ( EC:3.5.1.- )             | COG0846 |
| P73_1818 | superfamily II DNA/RNA helicase                                      | COG1061 |
| P73_1891 | superfamily II DNA/RNA helicase                                      | COG1061 |
| P73_0209 | transcription termination factor Rho                                 | COG1158 |
| P73_0785 | class I and II aminotransferase                                      | COG1167 |
| P73_3917 | GntR family transcriptional regulator                                | COG1167 |
| P73_2540 | transcription-repair coupling factor ( EC:3.6.4.- )                  | COG1197 |
| P73_2602 | ATP-dependent DNA helicase RecG ( EC:3.6.4.12 )                      | COG1200 |
| P73_2776 | cold shock protein CspA                                              | COG1278 |
| P73_2793 | cold-shock DNA-binding protein family protein                        | COG1278 |
| P73_2990 | cold-shock DNA-binding domain-containing protein                     | COG1278 |
| P73_3537 | cold-shock DNA-binding domain-containing protein                     | COG1278 |
| P73_3586 | cold shock protein CspA                                              | COG1278 |
| P73_0532 | TetR family transcriptional regulator                                | COG1309 |
| P73_0730 | TetR family transcriptional regulator                                | COG1309 |
| P73_0774 | TetR family transcriptional regulator                                | COG1309 |
| P73_0904 | TetR family transcriptional regulator                                | COG1309 |
| P73_1089 | TetR family transcriptional regulator                                | COG1309 |
| P73_1116 | TetR family transcriptional regulator                                | COG1309 |
| P73_1768 | TetR family transcriptional regulator                                | COG1309 |
| P73_2219 | TetR family transcriptional regulator                                | COG1309 |
| P73_2283 | TetR family transcriptional regulator                                | COG1309 |

|          |                                                  |         |
|----------|--------------------------------------------------|---------|
| P73_2378 | TetR family transcriptional regulator            | COG1309 |
| P73_3027 | TetR family transcriptional regulator            | COG1309 |
| P73_3059 | TetR family transcriptional regulator            | COG1309 |
| P73_3889 | transcriptional regulator, TetR family protein   | COG1309 |
| P73_3895 | TetR family transcriptional regulator            | COG1309 |
| P73_3962 | TetR family transcriptional regulator            | COG1309 |
| P73_3975 | transcriptional regulator                        | COG1309 |
| P73_4088 | TetR family transcriptional regulator            | COG1309 |
| P73_4100 | transcriptional regulator                        | COG1309 |
| P73_4608 | DtxR family iron dependent repressor             | COG1321 |
| P73_3307 | transcriptional regulator NrdR                   | COG1327 |
| P73_3278 | CarD family transcriptional regulator            | COG1329 |
| P73_1660 | DeoR family transcriptional regulator            | COG1349 |
| P73_2856 | DeoR family transcriptional regulator            | COG1349 |
| P73_3998 | transcriptional repressor of aga operon          | COG1349 |
| P73_2684 | condensin subunit ScpB                           | COG1386 |
| P73_0137 | DNA-binding protein                              | COG1396 |
| P73_1091 | XRE family transcriptional regulator             | COG1396 |
| P73_1524 | XRE family transcriptional regulator             | COG1396 |
| P73_2544 | DNA-binding protein                              | COG1396 |
| P73_3227 | putative helix-turn-helix protein                | COG1396 |
| P73_0183 | transcriptional repressor                        | COG1414 |
| P73_0327 | IclR family transcriptional regulator            | COG1414 |
| P73_0836 | beta-ketoadipate pathway transcription regulator | COG1414 |
| P73_1376 | transcriptional regulator                        | COG1414 |
| P73_1984 | regulatory protein, IclR                         | COG1414 |
| P73_2099 | putative transcriptional regulator               | COG1414 |
| P73_2830 | transcriptional regulator                        | COG1414 |
| P73_2981 | IclR family transcriptional regulator            | COG1414 |
| P73_3721 | IclR family transcriptional regulator            | COG1414 |
| P73_4407 | DNA-binding transcriptional activator MhpR       | COG1414 |
| P73_0219 | heat-inducible transcription repressor           | COG1420 |
| P73_0214 | chromosome-partitioning protein ParB             | COG1475 |
| P73_0953 | ParB domain-containing protein nuclease          | COG1475 |
| P73_1794 | ParB-like domain protein                         | COG1475 |
| P73_1867 | ParB-like domain protein                         | COG1475 |
| P73_2264 | ParB-like domain protein                         | COG1475 |
| P73_2782 | parB-like partition protein                      | COG1475 |
| P73_4391 | plasmid partitioning protein RepB-8              | COG1475 |
| P73_4526 | parB-like partition protein                      | COG1475 |
| P73_4528 | ParB family protein                              | COG1475 |
| P73_4545 | parB-like partition protein                      | COG1475 |
| P73_4669 | plasmid partitioning protein RepB                | COG1475 |

|          |                                                                                    |         |
|----------|------------------------------------------------------------------------------------|---------|
| P73_4671 | ParB family protein                                                                | COG1475 |
| P73_1542 | XRE family transcriptional regulator                                               | COG1476 |
| P73_1595 | Predicted transcriptional regulators                                               | COG1476 |
| P73_4558 | Predicted transcriptional regulators                                               | COG1476 |
| P73_4064 | MarR family transcriptional regulator                                              | COG1497 |
| P73_4498 | RNA polymerase factor sigma-54                                                     | COG1508 |
| P73_3427 | pantothenate kinase ( EC:2.7.1.33 )                                                | COG1521 |
| P73_1138 | AsnC family transcriptional regulator                                              | COG1522 |
| P73_1156 | AsnC family transcriptional regulator                                              | COG1522 |
| P73_1165 | AsnC family transcriptional regulator                                              | COG1522 |
| P73_1274 | AsnC/Lrp family transcriptional regulator                                          | COG1522 |
| P73_2393 | AsnC family transcriptional regulator                                              | COG1522 |
| P73_2998 | AsnC family transcriptional regulator                                              | COG1522 |
| P73_3468 | AsnC family transcriptional regulator                                              | COG1522 |
| P73_3469 | AsnC family transcriptional regulator                                              | COG1522 |
| P73_3621 | putative leucine-responsive regulatory protein                                     | COG1522 |
| P73_3747 | Leucine-responsive regulatory protein                                              | COG1522 |
| P73_4225 | AsnC family transcriptional regulator                                              | COG1522 |
| P73_1099 | RNA polymerase sigma-70 family protein                                             | COG1595 |
| P73_1495 | RNA polymerase sigma factor                                                        | COG1595 |
| P73_3348 | RNA polymerase sigma factor                                                        | COG1595 |
| P73_3924 | ECF subfamily RNA polymerase sigma-24 factor                                       | COG1595 |
| P73_3977 | extracytoplasmic-function sigma-70 factor                                          | COG1595 |
| P73_4354 | ECF subfamily RNA polymerase sigma-24 factor                                       | COG1595 |
| P73_0372 | LacI family transcriptional regulator                                              | COG1609 |
| P73_2138 | transcriptional regulator, LacI family protein                                     | COG1609 |
| P73_2143 | regulatory protein LacI:Periplasmic binding protein/LacI transcriptional regulator | COG1609 |
| P73_2189 | LacI family transcriptional regulator                                              | COG1609 |
| P73_2408 | Transcriptional regulator                                                          | COG1609 |
| P73_3110 | LacI family transcriptional regulator                                              | COG1609 |
| P73_3123 | LacI family transcriptional regulator                                              | COG1609 |
| P73_4170 | LacI family transcriptional regulator                                              | COG1609 |
| P73_4511 | LacI family transcriptional regulator                                              | COG1609 |
| P73_4274 | Putative transcriptional regulator                                                 | COG1678 |
| P73_2461 | hypothetical protein                                                               | COG1725 |
| P73_1110 | HxlR family transcriptional regulator                                              | COG1733 |
| P73_1956 | transcriptional regulator                                                          | COG1733 |
| P73_3310 | putative transcriptional regulator                                                 | COG1733 |
| P73_1043 | RpiR family transcriptional regulator                                              | COG1737 |
| P73_1944 | RpiR family transcriptional regulator                                              | COG1737 |
| P73_3122 | RpiR family transcriptional regulator                                              | COG1737 |
| P73_3779 | RpiR family transcriptional regulator                                              | COG1737 |



|          |                                                           |         |
|----------|-----------------------------------------------------------|---------|
| P73_3944 | RpiR family transcriptional regulator                     | COG1737 |
| P73_4102 | transcriptional regulator, RpiR family                    | COG1737 |
| P73_0601 | DNA-directed RNA polymerase subunit omega ( EC:2.7.7.6 )  | COG1758 |
| P73_2705 | DNA-directed RNA polymerase, omega subunit ( EC:2.7.7.6 ) | COG1758 |
| P73_1147 | GntR family transcriptional regulator                     | COG1802 |
| P73_2019 | transcriptional regulator                                 | COG1802 |
| P73_2172 | GntR-family transcription regulator                       | COG1802 |
| P73_2390 | transcriptional regulator, GntR family                    | COG1802 |
| P73_2558 | GntR family transcriptional regulator                     | COG1802 |
| P73_2824 | GntR family transcriptional regulator                     | COG1802 |
| P73_2868 | GntR family transcriptional regulator                     | COG1802 |
| P73_2877 | GntR family transcriptional regulator                     | COG1802 |
| P73_3173 | GntR family transcriptional regulator                     | COG1802 |
| P73_3711 | GntR family transcriptional regulator                     | COG1802 |
| P73_3755 | GntR family transcriptional regulator                     | COG1802 |
| P73_3881 | GntR family HTH-type transcriptional regulator            | COG1802 |
| P73_4048 | GntR family transcriptional regulator                     | COG1802 |
| P73_4587 | XRE family transcriptional regulator                      | COG1813 |
| P73_0233 | MarR family transcriptional regulator                     | COG1846 |
| P73_0253 | MarR family transcriptional regulator                     | COG1846 |
| P73_0297 | transcriptional regulator                                 | COG1846 |
| P73_0307 | MarR family transcriptional regulator                     | COG1846 |
| P73_0337 | MarR family transcriptional regulator                     | COG1846 |
| P73_0357 | MarR family transcriptional regulator                     | COG1846 |
| P73_1406 | Transcriptional regulator                                 | COG1846 |
| P73_1461 | MarR family transcriptional regulator                     | COG1846 |
| P73_1467 | MarR family transcriptional regulator                     | COG1846 |
| P73_2073 | transcription regulator MarR family protein               | COG1846 |
| P73_2115 | MarR family transcriptional regulator                     | COG1846 |
| P73_2418 | MarR family transcriptional regulator                     | COG1846 |
| P73_2961 | putative Transcriptional regulator, MarR family protein   | COG1846 |
| P73_2985 | MarR family transcriptional regulator                     | COG1846 |
| P73_3223 | MarR family transcriptional regulator                     | COG1846 |
| P73_3544 | MarR family transcriptional regulator                     | COG1846 |
| P73_3580 | histone acetyltransferase HPA2-related acetyltransferase  | COG1846 |
| P73_4393 | MarR family transcriptional regulator                     | COG1846 |
| P73_4749 | MarR family transcriptional regulator                     | COG1846 |
| P73_2893 | ROK family protein                                        | COG1940 |
| P73_3997 | N-acetyl-D-glucosamine kinase ( EC:2.7.1.59 )             | COG1940 |
| P73_1145 | BadM/Rrf2 family transcriptional regulator                | COG1959 |
| P73_2259 | BadM/Rrf2 family transcriptional regulator                | COG1959 |
| P73_2344 | iron-sulfur cluster assembly transcription factor IscR    | COG1959 |
| P73_1588 | LexA repressor ( EC:3.4.21.88 )                           | COG1974 |

|          |                                                                                     |         |
|----------|-------------------------------------------------------------------------------------|---------|
| P73_4548 | regulator PrlF                                                                      | COG2002 |
| P73_4524 | S1 RNA-binding domain-containing protein                                            | COG2183 |
| P73_0125 | GntR family transcriptional regulator                                               | COG2186 |
| P73_1650 | GntR family transcriptional regulator                                               | COG2186 |
| P73_4023 | GntR family transcriptional regulator                                               | COG2186 |
| P73_0807 | GntR family transcriptional regulator                                               | COG2188 |
| P73_1073 | transcriptional regulator, GntR family protein                                      | COG2188 |
| P73_2419 | GntR family transcriptional regulator                                               | COG2188 |
| P73_0586 | response regulator receiver-like protein                                            | COG2197 |
| P73_0679 | transcriptional regulator                                                           | COG2197 |
| P73_0758 | LuxR family transcriptional regulator                                               | COG2197 |
| P73_2553 | LuxR family autoinducer-binding transcriptional regulator                           | COG2197 |
| P73_3851 | LuxR family transcriptional regulator                                               | COG2197 |
| P73_3925 | putative response regulator receiver protein                                        | COG2197 |
| P73_3956 | nitrate/nitrite regulatory protein                                                  | COG2197 |
| P73_4133 | LuxR family two component transcriptional regulator                                 | COG2197 |
| P73_0074 | AraC family transcriptional regulator                                               | COG2207 |
| P73_0847 | transcriptional regulator                                                           | COG2207 |
| P73_1106 | AraC family transcriptional regulator                                               | COG2207 |
| P73_1297 | transcriptional regulator                                                           | COG2207 |
| P73_1978 | helix-turn-helix domain-containing protein                                          | COG2207 |
| P73_2091 | AraC family transcriptional regulator                                               | COG2207 |
| P73_2396 | AraC family transcriptional regulator                                               | COG2207 |
| P73_2623 | AraC family transcriptional regulator                                               | COG2207 |
| P73_3339 | transcriptional regulator                                                           | COG2207 |
| P73_4764 | AraC family transcriptional regulator                                               | COG2207 |
| P73_0238 | response regulator receiver domain/protein phosphatase 2C domain-containing protein | COG2208 |
| P73_4316 | putative transcriptional regulator                                                  | COG2345 |
| P73_1970 | Predicted transcriptional regulator                                                 | COG2378 |
| P73_3417 | Predicted transcriptional regulator                                                 | COG2378 |
| P73_1375 | transcriptional regulator                                                           | COG2390 |
| P73_4310 | DeoR family transcriptional regulator                                               | COG2390 |
| P73_0258 | Predicted nucleic-acid-binding protein implicated in transcription termination      | COG2740 |
| P73_2092 | regulatory protein LuxR                                                             | COG2771 |
| P73_3517 | transcriptional regulator                                                           | COG2808 |
| P73_2331 | transcriptional regulator, LuxR family protein                                      | COG2909 |
| P73_2861 | Fis family GAF modulated sigma54 specific transcriptional regulator                 | COG3284 |
| P73_4224 | Fis family transcriptional regulator                                                | COG3284 |
| P73_1027 | phage transcriptional regulator AlpA                                                | COG3311 |
| P73_1431 | transcriptional regulator                                                           | COG3311 |
| P73_2456 | prophage CP4-57 regulatory                                                          | COG3311 |

|          |                                                |         |
|----------|------------------------------------------------|---------|
| P73_3605 | response regulator                             | COG3437 |
| P73_4628 | transcriptional regulator                      | COG3609 |
| P73_4811 | transcriptional regulator                      | COG3620 |
| P73_4475 | sigma-54 dependent transcription regulator     | COG3829 |
| P73_4499 | sigma-54 dependent transcription regulator     | COG3829 |
| P73_1752 | Predicted transcriptional regulator            | COG4190 |
| P73_2302 | Predicted transcriptional regulator            | COG4190 |
| P73_0188 | photosynthetic apparatus regulatory protein    | COG4567 |
| P73_1402 | RNA polymerase sigma factor protein (sigma-70) | COG4941 |
| P73_0132 | AraC family transcriptional regulator          | COG4977 |
| P73_4399 | AraC family transcriptional regulator          | COG4977 |
| P73_4130 | hypothetical protein                           | COG5137 |

**Data S6 | Genes in the P73<sup>T</sup> genome related to lipid transport and metabolism COG categories.**

| Locus Tag | Gene Product Name                                         | COGs    |
|-----------|-----------------------------------------------------------|---------|
| P73_0066  | 3-oxoacid CoA-transferase, B subunit                      | COG2057 |
| P73_0067  | 3-oxoacid CoA-transferase subunit A                       | COG1788 |
| P73_0180  | long-chain-fatty-acid-CoA ligase                          | COG0318 |
| P73_0184  | putative fatty acid/hydrocarbon transporter               | COG2067 |
| P73_0187  | acyl-CoA dehydrogenase-like protein                       | COG1960 |
| P73_0224  | short-chain dehydrogenase/reductase sdr                   | COG1028 |
| P73_0228  | short chain dehydrogenase                                 | COG1028 |
| P73_0301  | 1-deoxy-D-xylulose-5-phosphate synthase                   | COG1154 |
| P73_0338  | long-chain-fatty-acid--CoA ligase                         | COG0318 |
| P73_0339  | enoyl-CoA hydratase                                       | COG1024 |
| P73_0341  | thiolase                                                  | COG0183 |
| P73_0349  | 2,3-dihydroxy-2,3-dihydrophenylpropionate dehydrogenase   | COG1028 |
| P73_0367  | Putative lipid carrier protein                            | COG3154 |
| P73_0399  | enoyl-CoA hydratase/isomerase                             | COG1024 |
| P73_0501  | 3-hydroxybutyryl-CoA dehydrogenase                        | COG1250 |
| P73_0540  | acetyl-CoA carboxylase, carboxyl transferase subunit beta | COG0777 |
| P73_0598  | 4-hydroxy-3-methylbut-2-enyl diphosphate reductase        | COG0761 |
| P73_0606  | 4'-phosphopantetheinyl transferase                        | COG0736 |
| P73_0612  | isobutyryl-CoA dehydrogenase                              | COG1960 |
| P73_0622  | 3-hydroxybutyryl-CoA dehydrogenase                        | COG1250 |
| P73_0712  | acyltransferase 3                                         | COG1835 |
| P73_0837  | 3-oxoacid CoA-transferase subunit A                       | COG1788 |
| P73_0838  | 3-oxoacid CoA-transferase subunit B                       | COG2057 |
| P73_0839  | beta-ketoadipyl CoA thiolase                              | COG0183 |
| P73_0882  | AMP-dependent synthetase/ligase                           | COG0365 |
| P73_0892  | 3-hydroxyacyl-CoA dehydrogenase                           | COG1250 |

|          |                                                         |         |
|----------|---------------------------------------------------------|---------|
| P73_0893 | acetyl-CoA acetyltransferase                            | COG0183 |
| P73_0895 | acyl-CoA dehydrogenase                                  | COG1960 |
| P73_0925 | AMP-binding domain protein                              | COG0318 |
| P73_0926 | 3-oxoacyl(acyl carrier protein) synthase III            | COG0332 |
| P73_1055 | FabG                                                    | COG1028 |
| P73_1108 | short chain dehydrogenase                               | COG1028 |
| P73_1111 | NADP oxidoreductase coenzyme F420-dependent             | COG1028 |
| P73_1113 | short-chain dehydrogenase/reductase SDR                 | COG1028 |
| P73_1222 | butyryl-CoA:acetate CoA transferase                     | COG2057 |
| P73_1224 | succinyl-CoA:3-ketoacid-CoA transferase subunit A       | COG1788 |
| P73_1308 | enoyl-ACP reductase                                     | COG0623 |
| P73_1309 | 3-oxoacyl-ACP synthase                                  | COG0304 |
| P73_1310 | 3-hydroxydecanoyl(acyl carrier protein) dehydratase     | COG0764 |
| P73_1395 | acyl-CoA dehydrogenase                                  | COG1960 |
| P73_1396 | short-chain specific acyl-CoA dehydrogenase             | COG1960 |
| P73_1462 | short-chain dehydrogenase/reductase SDR                 | COG1028 |
| P73_1463 | enoyl-CoA hydratase/isomerase                           | COG1024 |
| P73_1468 | feruloyl-CoA synthase                                   | COG0318 |
| P73_1470 | Acyl-CoA dehydrogenase                                  | COG1960 |
| P73_1584 | enoyl-CoA hydratase                                     | COG1024 |
| P73_1676 | malonyl CoA-acyl carrier protein transacylase FabD      | COG0331 |
| P73_1677 | 3-oxoacyl-ACP reductase                                 | COG1028 |
| P73_1678 | acyl carrier protein                                    | COG0236 |
| P73_1679 | 3-oxoacyl(acyl carrier protein) synthase II             | COG0304 |
| P73_2012 | MaoC-like dehydratase                                   | COG2030 |
| P73_2020 | 6-phosphogluconate dehydrogenase                        | COG2084 |
| P73_2030 | putative oxidoreductase protein                         | COG1028 |
| P73_2054 | 3-oxoacyl-ACP reductase                                 | COG1028 |
| P73_2159 | short chain alcohol dehydrogenase-related dehydrogenase | COG1028 |
| P73_2224 | aromatic hydrocarbon degradation membrane protein       | COG2067 |
| P73_2237 | cyclase/dehydrase                                       | COG2867 |
| P73_2241 | phosphatidylglycerophosphatase                          | COG1267 |
| P73_2242 | 2-C-methyl-D-erythritol 2,4-cyclodiphosphate synthase   | COG0245 |
| P73_2255 | 6-phosphogluconate dehydrogenase                        | COG2084 |
| P73_2315 | phospholipid/glycerol acyltransferase                   | COG0204 |
| P73_2369 | short chain dehydrogenase/reductase oxidoreductase      | COG1028 |
| P73_2370 | 2,5-dichloro-2,5-cyclohexadiene-1,4-diol dehydrogenase  | COG1028 |
| P73_2373 | poly-beta-hydroxybutyrate polymerase domain protein     | COG3243 |
| P73_2494 | Phytoene/squalene synthetase                            | COG1562 |
| P73_2499 | type 12 methyltransferase                               | COG3963 |
| P73_2529 | sterol carrier family protein                           | COG3255 |
| P73_2546 | 3-hydroxybutyrate dehydrogenase                         | COG1028 |
| P73_2613 | (3R)-hydroxymyristoyl-ACP dehydratase                   | COG0764 |

|          |                                                                                                                                                 |         |
|----------|-------------------------------------------------------------------------------------------------------------------------------------------------|---------|
| P73_2617 | 1-deoxy-D-xylulose 5-phosphate reductoisomerase                                                                                                 | COG0743 |
| P73_2618 | phosphatidate cytidyltransferase                                                                                                                | COG0575 |
| P73_2619 | undecaprenyl diphosphate synthase                                                                                                               | COG0020 |
| P73_2637 | beta-ketoacyl synthase                                                                                                                          | COG0304 |
| P73_2638 | acyl carrier protein                                                                                                                            | COG0236 |
| P73_2678 | phosphate acyltransferase                                                                                                                       | COG0416 |
| P73_2679 | 3-oxoacyl(acyl carrier protein) synthase III                                                                                                    | COG0332 |
| P73_2762 | methylase/helicase                                                                                                                              | COG3963 |
| P73_2794 | fatty acid desaturase                                                                                                                           | COG3239 |
| P73_2801 | fatty acid desaturase                                                                                                                           | COG3239 |
| P73_2864 | short-chain dehydrogenase/reductase sDR                                                                                                         | COG1028 |
| P73_2871 | short-chain dehydrogenase/reductase SDR                                                                                                         | COG1028 |
| P73_2909 | 4-hydroxy-3-methylbut-2-en-1-yl diphosphate synthase                                                                                            | COG0821 |
| P73_2917 | diacylglycerol kinase catalytic subunit                                                                                                         | COG1597 |
| P73_2984 | bacilysin biosynthesis oxidoreductase BacC                                                                                                      | COG1028 |
| P73_2992 | enoyl(acyl carrier protein) reductase                                                                                                           | COG0623 |
| P73_3004 | PA-phosphatase-like phosphoesterase                                                                                                             | COG0671 |
| P73_3009 | 3-hydroxyacyl-CoA dehydrogenase                                                                                                                 | COG1250 |
| P73_3017 | acetate--CoA ligase                                                                                                                             | COG0365 |
| P73_3031 | biotin carboxyl carrier protein                                                                                                                 | COG0511 |
| P73_3032 | acetyl-CoA carboxylase biotin carboxylase subunit                                                                                               | COG4770 |
| P73_3101 | 2-hydroxy-3-oxopropionate reductase                                                                                                             | COG2084 |
| P73_3132 | bacilysin biosynthesis oxidoreductase bacC                                                                                                      | COG1028 |
| P73_3133 | short-chain dehydrogenase/reductase SDR                                                                                                         | COG1028 |
| P73_3135 | 3-oxoacyl-ACP reductase                                                                                                                         | COG1028 |
| P73_3161 | acyl-CoA hydrolase                                                                                                                              | COG1607 |
| P73_3283 | sterol-binding domain-containing protein                                                                                                        | COG3255 |
| P73_3284 | Lysophospholipase                                                                                                                               | COG2267 |
| P73_3312 | short-chain dehydrogenase/reductase SDR                                                                                                         | COG1028 |
| P73_3368 | methylmalonyl-CoA mutase                                                                                                                        | COG1884 |
| P73_3371 | propionyl-CoA carboxylase subunit alpha                                                                                                         | COG4770 |
| P73_3377 | propionyl-CoA carboxylase subunit beta                                                                                                          | COG4799 |
| P73_3494 | alkane 1-monooxygenase                                                                                                                          | COG3239 |
| P73_3531 | poly(3-hydroxyalkanoate) polymerase                                                                                                             | COG3243 |
| P73_3532 | polyhydroxyalkanoate depolymerase                                                                                                               | COG4553 |
| P73_3639 | MaoC domain-containing protein dehydratase                                                                                                      | COG2030 |
| P73_3829 | esterase                                                                                                                                        | COG0657 |
| P73_3853 | methylmalonyl-CoA mutase large subunit                                                                                                          | COG1884 |
| P73_3865 | MaoC domain-containing protein                                                                                                                  | COG2030 |
| P73_3880 | thioesterase superfamily protein                                                                                                                | COG1607 |
| P73_3897 | acetate--CoA ligase                                                                                                                             | COG0365 |
| P73_3919 | Acyl-CoA dehydrogenase, C-terminal:Acyl-CoA dehydrogenase, central region:Acyl-CoA dehydrogenase, N-terminal:Acyl-CoA dehydrogenase, N-terminal | COG1960 |

|          |                                                                    |         |
|----------|--------------------------------------------------------------------|---------|
| P73_3993 | short-chain alcohol dehydrogenase-like protein                     | COG0623 |
| P73_4037 | acyl-CoA dehydrogenase                                             | COG1960 |
| P73_4054 | short-chain dehydrogenase/reductase SDR                            | COG1028 |
| P73_4084 | FMNH <sub>2</sub> -dependent monooxygenase                         | COG1960 |
| P73_4086 | putative acyl-CoA dehydrogenase                                    | COG1960 |
| P73_4108 | short-chain dehydrogenase/reductase SDR                            | COG1028 |
| P73_4196 | 7- $\alpha$ -hydroxysteroid dehydrogenase                          | COG1028 |
| P73_4244 | acetyl-CoA carboxylase carboxyltransferase subunit alpha           | COG0825 |
| P73_4246 | phospholipid/glycerol acyltransferase                              | COG0204 |
| P73_4255 | acyltransferase                                                    | COG0183 |
| P73_4256 | acetoacetyl-CoA reductase                                          | COG1028 |
| P73_4262 | 4-diphosphocytidyl-2-C-methyl-D-erythritol kinase                  | COG1947 |
| P73_4273 | acyl-CoA dehydrogenase                                             | COG1960 |
| P73_4283 | glycerol-3-phosphate acyltransferase PlsY                          | COG0344 |
| P73_4294 | CDP-diacylglycerol--glycerol-3-phosphate 3-phosphatidyltransferase | COG0558 |
| P73_4296 | short chain dehydrogenase                                          | COG1028 |
| P73_4305 | sorbitol dehydrogenase                                             | COG1028 |
| P73_4368 | short-chain dehydrogenase/reductase SDR                            | COG1028 |
| P73_4369 | 3-oxoacyl-ACP reductase                                            | COG1028 |
| P73_4388 | enoyl-CoA hydratase/isomerase                                      | COG1024 |
| P73_4424 | 6-phosphogluconate dehydrogenase                                   | COG2084 |
| P73_4425 | 6-phosphogluconate dehydrogenase                                   | COG2084 |
| P73_4427 | 6-phosphogluconate dehydrogenase                                   | COG2084 |
| P73_4428 | 3-hydroxyisobutyrate dehydrogenase                                 | COG2084 |
| P73_4429 | enoyl-CoA hydratase/isomerase                                      | COG1024 |
| P73_4430 | oxidoreductase, short-chain dehydrogenase/reductase                | COG1028 |
| P73_4447 | 3-hydroxyacyl-CoA dehydrogenase                                    | COG1250 |
| P73_4449 | 3-hydroxyacyl-CoA dehydrogenase                                    | COG1250 |
| P73_4450 | acyl-CoA dehydrogenase                                             | COG1960 |
| P73_4452 | short chain enoyl-CoA hydratase                                    | COG1024 |
| P73_4453 | AMP-dependent synthetase and ligase                                | COG0318 |
| P73_4462 | 6-phosphogluconate dehydrogenase                                   | COG2084 |
| P73_4463 | acyl-CoA dehydrogenase yngJ                                        | COG1960 |
| P73_4477 | 3-hydroxyacyl-CoA dehydrogenase                                    | COG1250 |
| P73_4478 | acyl-CoA dehydrogenase                                             | COG1960 |
| P73_4480 | short chain enoyl-CoA hydratase                                    | COG1024 |
| P73_4481 | AMP-dependent synthetase and ligase                                | COG0318 |
| P73_4485 | acyl-CoA dehydrogenase yngJ                                        | COG1960 |
| P73_4486 | thiolase                                                           | COG0183 |
| P73_4487 | dehydratase                                                        | COG2030 |
| P73_4488 | enoyl-CoA hydratase                                                | COG1024 |
| P73_4491 | beta-ketoadipyl-CoA thiolase PaaJ                                  | COG0183 |
| P73_4496 | oxidoreductase, short-chain dehydrogenase/reductase                | COG1028 |

|          |                             |         |
|----------|-----------------------------|---------|
| P73_4696 | putative methylase/helicase | COG3963 |
|----------|-----------------------------|---------|

**Data S7 | Genes in the P73<sup>T</sup> genome related to cell motility and chemotaxis.** Genes of cell motility, and chemotaxis predicted by ‘KEGG Orthology (KO) terms’ analyses (Sheet 1); Genes of COG category N (Sheet 2).

**Sheet 1 (Excel)**

| Locus Tag | Gene Product Name                                                                  | Func ID   |
|-----------|------------------------------------------------------------------------------------|-----------|
| P73_0088  | flagellin-like protein                                                             | KO:K02406 |
| P73_0092  | H <sup>+</sup> -transporting two-sector ATPase, alpha/beta subunit ( EC:3.6.3.14 ) | KO:K02412 |
| P73_0093  | flagellar basal body rod protein FlgB                                              | KO:K02387 |
| P73_0094  | flagellar basal body rod protein FlgC                                              | KO:K02388 |
| P73_0095  | flagellar hook-basal body protein FliE                                             | KO:K02408 |
| P73_0096  | flagellar biosynthetic protein FliQ                                                | KO:K02420 |
| P73_0097  | flagellar basal body rod protein FlgF                                              | KO:K02391 |
| P73_0098  | flagellar basal body rod protein FlgG                                              | KO:K02392 |
| P73_0099  | flagellar basal body P-ring biosynthesis protein FlgA                              | KO:K02386 |
| P73_0100  | flagellar basal body L-ring protein                                                | KO:K02393 |
| P73_0103  | flagellar biosynthesis protein FlhB                                                | KO:K02401 |
| P73_0104  | flagellar biosynthetic protein FliR                                                | KO:K02421 |
| P73_0105  | flagellar biosynthesis protein FlhA                                                | KO:K02400 |
| P73_0107  | flagellar motor protein MotA                                                       | KO:K02556 |
| P73_0111  | flagellar MS-ring protein                                                          | KO:K02409 |
| P73_0112  | hypothetical protein                                                               | KO:K02411 |
| P73_0113  | flagellar motor switch protein FliN                                                | KO:K02417 |
| P73_0114  | flagellar biosynthesis protein FliP                                                | KO:K02419 |
| P73_0115  | flagellar basal body P-ring protein                                                | KO:K02394 |
| P73_0116  | flagellar hook-associated protein FlgL                                             | KO:K02397 |
| P73_0117  | flagellar hook-associated protein FlgK                                             | KO:K02396 |
| P73_0118  | flagellar hook protein FlgE                                                        | KO:K02390 |
| P73_0119  | chemotaxis MotB protein                                                            | KO:K02557 |
| P73_1480  | methyl-accepting chemotaxis protein McpH                                           | KO:K03406 |
| P73_1637  | flagellar motor switch protein FliG                                                | KO:K02410 |
| P73_2176  | methyl-accepting chemotaxis protein McpA                                           | KO:K03406 |
| P73_2177  | chemotaxis-specific protein-glutamate methyltransferase ( EC:3.1.1.61 )            | KO:K03412 |
| P73_2178  | chemoreceptor glutamine deamidase CheD ( EC:3.5.1.44 )                             | KO:K03411 |
| P73_2181  | chemotaxis protein CheY                                                            | KO:K03413 |
| P73_2182  | chemotaxis protein CheR ( EC:2.1.1.80 )                                            | KO:K00575 |
| P73_2183  | chemotaxis protein CheW                                                            | KO:K03408 |
| P73_2184  | chemotaxis protein CheA ( EC:2.7.13.3 )                                            | KO:K03407 |

|          |                                                                                                 |           |
|----------|-------------------------------------------------------------------------------------------------|-----------|
| P73_2185 | response regulator receiver protein, CheY like protein                                          | KO:K03413 |
| P73_2186 | Anti-anti-sigma regulatory factor (antagonist of anti-sigma factor)                             | KO:K03409 |
| P73_2413 | periplasmic binding protein/LacI transcriptional regulator                                      | KO:K10439 |
| P73_2421 | LacI family transcriptional regulator                                                           | KO:K10439 |
| P73_3011 | surface presentation of antigens (SPOA) protein                                                 | KO:K02416 |
| P73_3655 | Flagellar motor protein                                                                         | KO:K02557 |
| P73_3896 | methyl-accepting chemotaxis protein McpA                                                        | KO:K03406 |
| P73_4153 | two-component system, chemotaxis family, response regulator CheB<br>( EC:2.1.1.80,EC:3.1.1.61 ) | KO:K13924 |
| P73_4383 | flagellar basal body rod modification protein                                                   | KO:K02389 |
| P73_4506 | ABC ribose transporter, periplasmic solute-binding protein                                      | KO:K10439 |

### Sheet 2 (Excel)

| Locus Tag | Gene Product Name                                                                  | COG     |
|-----------|------------------------------------------------------------------------------------|---------|
| P73_0086  | flagellar protein FlgJ                                                             | COG3951 |
| P73_0088  | flagellin-like protein                                                             | COG1344 |
| P73_0089  | flagellar biosynthesis regulatory protein FlaF                                     | COG5442 |
| P73_0090  | flagellar biosynthesis repressor FlbT                                              | COG5443 |
| P73_0092  | H <sup>+</sup> -transporting two-sector ATPase, alpha/beta subunit ( EC:3.6.3.14 ) | COG1157 |
| P73_0093  | flagellar basal body rod protein FlgB                                              | COG1815 |
| P73_0094  | flagellar basal body rod protein FlgC                                              | COG1558 |
| P73_0095  | flagellar hook-basal body protein FliE                                             | COG1677 |
| P73_0096  | flagellar biosynthetic protein FliQ                                                | COG1987 |
| P73_0097  | flagellar basal body rod protein FlgF                                              | COG4786 |
| P73_0098  | flagellar basal body rod protein FlgG                                              | COG4786 |
| P73_0099  | flagellar basal body P-ring biosynthesis protein FlgA                              | COG1261 |
| P73_0100  | flagellar basal body L-ring protein                                                | COG2063 |
| P73_0103  | flagellar biosynthesis protein FlhB                                                | COG1377 |
| P73_0104  | flagellar biosynthetic protein FliR                                                | COG1684 |
| P73_0105  | flagellar biosynthesis protein FlhA                                                | COG1298 |
| P73_0107  | flagellar motor protein MotA                                                       | COG1291 |
| P73_0110  | flagellar basal body-associated protein FliL                                       | COG1580 |
| P73_0111  | flagellar MS-ring protein                                                          | COG1766 |
| P73_0112  | hypothetical protein                                                               | COG1317 |
| P73_0113  | flagellar motor switch protein FliN                                                | COG1886 |
| P73_0114  | flagellar biosynthesis protein FliP                                                | COG1338 |
| P73_0115  | flagellar basal body P-ring protein                                                | COG1706 |
| P73_0116  | flagellar hook-associated protein FlgL                                             | COG1344 |
| P73_0117  | flagellar hook-associated protein FlgK                                             | COG1256 |
| P73_0118  | flagellar hook protein FlgE                                                        | COG1749 |
| P73_0119  | chemotaxis MotB protein                                                            | COG1360 |
| P73_0986  | conjugal transfer protein TrbB                                                     | COG5268 |



|          |                                                                                               |         |
|----------|-----------------------------------------------------------------------------------------------|---------|
| P73_1210 | type II secretion system protein                                                              | COG2064 |
| P73_1480 | methyl-accepting chemotaxis protein McpH                                                      | COG0840 |
| P73_1637 | flagellar motor switch protein FliG                                                           | COG1536 |
| P73_1762 | conjugal transfer protein TrbB                                                                | COG5268 |
| P73_1849 | Flagellin and related hook-associated proteins                                                | COG1344 |
| P73_1922 | Flagellin and related hook-associated proteins                                                | COG1344 |
| P73_2176 | methyl-accepting chemotaxis protein McpA                                                      | COG0840 |
| P73_2177 | chemotaxis-specific protein-glutamate methyltransferase ( EC:3.1.1.61 )                       | COG2201 |
| P73_2178 | chemoreceptor glutamine deamidase CheD ( EC:3.5.1.44 )                                        | COG1871 |
| P73_2182 | chemotaxis protein CheR ( EC:2.1.1.80 )                                                       | COG1352 |
| P73_2183 | chemotaxis protein CheW                                                                       | COG0835 |
| P73_2184 | chemotaxis protein CheA ( EC:2.7.13.3 )                                                       | COG0643 |
| P73_2290 | conjugal transfer protein TrbB                                                                | COG5268 |
| P73_2512 | Protein required for attachment to host cells                                                 | COG5622 |
| P73_2728 | conjugal transfer protein TrbB                                                                | COG5268 |
| P73_3011 | surface presentation of antigens (SPOA) protein                                               | COG1868 |
| P73_3380 | Predicted periplasmic or secreted lipoprotein                                                 | COG1724 |
| P73_3655 | Flagellar motor protein                                                                       | COG1360 |
| P73_3707 | OmpA/MotB domain-containing protein                                                           | COG1360 |
| P73_3896 | methyl-accepting chemotaxis protein McpA                                                      | COG0840 |
| P73_4125 | type II secretion system protein                                                              | COG2064 |
| P73_4153 | two-component system, chemotaxis family, response regulator CheB ( EC:2.1.1.80, EC:3.1.1.61 ) | COG1352 |
| P73_4383 | flagellar basal body rod modification protein                                                 | COG1843 |

### Data S8 | Genes in the P73<sup>T</sup> genome involved in aromatic compounds degradation.

| Locus Tag | Product Name                                                        |
|-----------|---------------------------------------------------------------------|
| P73_0169  | fumarylacetoacetate (FAA) hydrolase                                 |
| P73_0170  | putative carboxymethylenebutenolidase                               |
| P73_0171  | putative TRAP-type C4-dicarboxylate transport system large permease |
| P73_0172  | TRAP dicarboxylate transporter subunit DctQ                         |
| P73_0173  | TRAP dicarboxylate transporter subunit DctP                         |
| P73_0174  | Mycothioliol maleylpyruvate isomerase N-terminal domain             |
| P73_0175  | gentisate 1,2-dioxygenase                                           |
| P73_0176  | maleylacetoacetate isomerase                                        |
| P73_0177  | fumarylpyruvate hydrolase                                           |
| P73_0182  | 4-hydroxybenzoyl-CoA Thioesterase                                   |
| P73_0327  | IcIR family transcriptional regulator                               |
| P73_0328  | monooxygenase                                                       |
| P73_0329  | homogentisate 1,2-dioxygenase                                       |
| P73_0330  | fumarylacetoacetate hydrolase family protein                        |

|          |                                                         |
|----------|---------------------------------------------------------|
| P73_0331 | maleylacetoacetate isomerase MaiA                       |
| P73_0332 | LysR family transcriptional regulator                   |
| P73_0333 | cytochrome P450                                         |
| P73_0334 | aldehyde dehydrogenase                                  |
| P73_0335 | ferredoxin-NADPH reductase                              |
| P73_0336 | choline dehydrogenase-like flavoprotein                 |
| P73_0337 | MarR family transcriptional regulator                   |
| P73_0338 | long-chain-fatty-acid--CoA ligase                       |
| P73_0339 | enoyl-CoA hydratase                                     |
| P73_0340 | hypothetical protein                                    |
| P73_0341 | thiolase                                                |
| P73_0342 | family 7 extracellular solute-binding protein           |
| P73_0343 | TRAP dicarboxylate transporter subunit DctQ             |
| P73_0344 | TRAP C4-dicarboxylate transporter permease DctM         |
| P73_0345 | putative fatty acid-CoA racemase                        |
| P73_0346 | IPB-dioxygenase, ISP large subunit                      |
| P73_0347 | Biphenyl 2,3-dioxygenase subunit beta                   |
| P73_0348 | phenylpropionate dioxygenase ferredoxin subunit         |
| P73_0349 | 2,3-dihydroxy-2,3-dihydrophenylpropionate dehydrogenase |
| P73_0350 | dehydrogenase PhnF                                      |
| P73_0351 | dihydrodipicolinate synthetase                          |
| P73_0352 | 2-hydroxychromene-2-carboxylate isomerase               |
| P73_0353 | catechol 2,3-dioxygenase                                |
| P73_0354 | pyridine nucleotide-disulfide oxidoreductase            |
| P73_0355 | OmpW family protein                                     |
| P73_0356 | glutathione S-transferase domain-containing protein     |
| P73_0357 | MarR family transcriptional regulator                   |
| P73_0363 | cytochrome P450 family protein                          |
| P73_0364 | alkane 1-monooxygenase                                  |
| P73_0470 | zinc-binding alcohol dehydrogenase family protein       |
| P73_0501 | 3-hydroxybutyryl-CoA dehydrogenase                      |
| P73_0506 | aldehyde dehydrogenase                                  |
| P73_0507 | extradiol ring-cleavage dioxygenase III subunit B       |
| P73_0554 | pyridine nucleotide-disulfide oxidoreductase            |
| P73_0622 | 3-hydroxybutyryl-CoA dehydrogenase                      |
| P73_0805 | hexapeptide repeat-containing transferase               |
| P73_0835 | putative two-component response regulator               |
| P73_0836 | beta-ketoadipate pathway transcription regulator        |
| P73_0837 | 3-oxoacid CoA-transferase subunit A                     |
| P73_0838 | 3-oxoacid CoA-transferase subunit B                     |
| P73_0839 | beta-ketoadipyl CoA thiolase                            |
| P73_0840 | pca operon transcriptional activator PcaQ               |
| P73_0841 | 3-oxoadipate enol-lactonase                             |

|          |                                                                                              |
|----------|----------------------------------------------------------------------------------------------|
| P73_0842 | 4-carboxymuconolactone decarboxylase                                                         |
| P73_0843 | Protocatechuate 3,4-dioxygenase, beta subunit                                                |
| P73_0844 | protocatechuate 3,4-dioxygenase subunit alpha                                                |
| P73_0845 | 3-carboxy-cis,cis-muconate cycloisomerase                                                    |
| P73_0846 | 4-hydroxybenzoate 3-monooxygenase                                                            |
| P73_0893 | acetyl-CoA acetyltransferase                                                                 |
| P73_0895 | acyl-CoA dehydrogenase                                                                       |
| P73_0898 | phenylacetic acid degradation-related protein                                                |
| P73_0899 | Uncharacterized protein, possibly involved in aromatic compounds catabolism                  |
| P73_0908 | aromatic compounds catabolism protein                                                        |
| P73_1051 | aromatic-ring-hydroxylating dioxygenase, ferredoxin subunit                                  |
| P73_1052 | LysR family transcriptional regulator                                                        |
| P73_1053 | Rieske (2Fe-2S) protein                                                                      |
| P73_1054 | FAD-dependent pyridine nucleotide-disulfide oxidoreductase                                   |
| P73_1085 | phosphonate metabolism protein                                                               |
| P73_1121 | muconate and chloromuconate cycloisomerase                                                   |
| P73_1122 | benzenetriol dioxygenase                                                                     |
| P73_1245 | Conserved protein/domain typically associated with flavoprotein oxygenases, DIM6/NTAB family |
| P73_1304 | 3-oxoadipate enol-lactonase                                                                  |
| P73_1381 | acetaldehyde dehydrogenase                                                                   |
| P73_1382 | 4-hydroxy-2-oxovalerate/4-hydroxy-2-oxopentanoic acid aldolase                               |
| P73_1453 | Mycothiol maleylpyruvate isomerase N-terminal domain                                         |
| P73_1454 | gentisate 1,2-dioxygenase                                                                    |
| P73_1455 | maleylacetoacetate isomerase                                                                 |
| P73_1456 | fumarylpyruvate hydrolase                                                                    |
| P73_1457 | salicylate hydroxylase                                                                       |
| P73_1550 | S-(hydroxymethyl)glutathione dehydrogenase                                                   |
| P73_1592 | cytochrome P450                                                                              |
| P73_1746 | cytochrome P450 family protein                                                               |
| P73_2150 | aromatic hydrocarbon dioxygenase small subunit                                               |
| P73_2151 | Rieske (2Fe-2S) domain-containing protein                                                    |
| P73_2167 | ferredoxin                                                                                   |
| P73_2169 | ferredoxin                                                                                   |
| P73_2223 | EamA-like transporter family                                                                 |
| P73_2224 | aromatic hydrocarbon degradation membrane protein                                            |
| P73_2225 | Predicted permeases                                                                          |
| P73_2321 | putative thioesterase superfamily protein                                                    |
| P73_2874 | ferredoxin:oxidoreductase FAD/NAD(P)-binding subunit                                         |
| P73_2875 | Rieske (2Fe-2S) domain-containing protein                                                    |
| P73_2927 | FAD-binding monooxygenase                                                                    |
| P73_2960 | Rieske (2Fe-2S) iron-sulfur domain-containing protein                                        |
| P73_2961 | putative Transcriptional regulator, MarR family protein                                      |

|          |                                                                           |
|----------|---------------------------------------------------------------------------|
| P73_2962 | EamA-like transporter family                                              |
| P73_2963 | hypothetical protein                                                      |
| P73_2964 | 4,5-dihydroxyphthalate decarboxylase                                      |
| P73_2965 | oxidoreductase domain-containing protein                                  |
| P73_2966 | ferredoxin-NADPH reductase                                                |
| P73_2967 | S-mandelate dehydrogenase (MdlB)                                          |
| P73_2968 | Phthalate 4,5-dioxygenase                                                 |
| P73_3226 | inner membrane transport protein                                          |
| P73_3227 | putative helix-turn-helix protein                                         |
| P73_3434 | carboxymuconolactone decarboxylase                                        |
| P73_3499 | ferredoxin                                                                |
| P73_3884 | Salicylate hydroxylase                                                    |
| P73_4038 | monooxygenase                                                             |
| P73_4255 | acyltransferase                                                           |
| P73_4376 | alcohol dehydrogenase GroES domain-containing protein                     |
| P73_4415 | ring hydroxylating dioxygenase, alpha-subunit                             |
| P73_4416 | iron-sulfur cluster-binding protein                                       |
| P73_4426 | carboxymuconolactone decarboxylase                                        |
| P73_4446 | cupin                                                                     |
| P73_4447 | 3-hydroxyacyl-CoA dehydrogenase                                           |
| P73_4474 | naphthoate synthase                                                       |
| P73_4485 | acyl-CoA dehydrogenase yngJ                                               |
| P73_4491 | beta-ketoadipyl-CoA thiolase PaaJ                                         |
| P73_4501 | 4-oxalocrotonate tautomerase                                              |
| P73_4516 | cupin                                                                     |
| P73_4517 | transcriptional regulator                                                 |
| P73_4518 | putative carboxymuconolactone decarboxylase                               |
| P73_4519 | oxidoreductase                                                            |
| P73_4520 | cupin                                                                     |
| P73_4521 | (2Fe-2S)-binding domain-containing protein                                |
| P73_4522 | aldehyde oxidase and xanthine dehydrogenase molybdopterin binding protein |
| P73_4757 | putative oxidoreductase                                                   |
| P73_4758 | ferredoxin reductase                                                      |
| P73_4762 | ferredoxin                                                                |
| P73_4763 | cytochrome P450                                                           |
| P73_4764 | AraC family transcriptional regulator                                     |
| P73_4773 | fumarylpyruvate hydrolase                                                 |
| P73_4774 | maleylacetoacetate isomerase                                              |
| P73_4775 | gentisate 1,2-dioxygenase                                                 |

**Data S9 | Genes in the P73<sup>T</sup> genome without homologs in the B30 genome.** The IMG ‘Phylogenetic Profiler for Single Genes’ was used. Maximum e-value = 0.00001; minimum identity = 30%.

| Locus Tag | Gene Name                                                           |
|-----------|---------------------------------------------------------------------|
| P73_0008  | transposase                                                         |
| P73_0009  | transposase                                                         |
| P73_0017  | transposase, mutator type                                           |
| P73_0045  | transposase                                                         |
| P73_0046  | transposase                                                         |
| P73_0074  | AraC family transcriptional regulator                               |
| P73_0075  | phospholipid-binding protein                                        |
| P73_0076  | hypothetical protein                                                |
| P73_0077  | hypothetical protein                                                |
| P73_0079  | protein GbuR                                                        |
| P73_0081  | Extracellular solute-binding protein, ABC transporter               |
| P73_0083  | transposase IS116/IS110/IS902 family protein                        |
| P73_0085  | transposase, IS4 family protein                                     |
| P73_0102  | hypothetical protein                                                |
| P73_0148  | extensin-like protein                                               |
| P73_0160  | Transcriptional Regulator, LysR family protein                      |
| P73_0162  | Predicted lactoylglutathione lyase                                  |
| P73_0163  | hydrolase                                                           |
| P73_0164  | carbon monoxide dehydrogenase subunit G                             |
| P73_0165  | molybdopterin dehydrogenase FAD-binding protein                     |
| P73_0168  | SnoaL-like domain                                                   |
| P73_0170  | putative carboxymethylenebutenolidase                               |
| P73_0171  | putative TRAP-type C4-dicarboxylate transport system large permease |
| P73_0172  | TRAP dicarboxylate transporter subunit DctQ                         |
| P73_0173  | TRAP dicarboxylate transporter subunit DctP                         |
| P73_0179  | TRAP transporter solute receptor, TAXI family protein               |
| P73_0182  | 4-hydroxybenzoyl-CoA Thioesterase                                   |
| P73_0183  | transcriptional repressor                                           |
| P73_0184  | putative fatty acid/hydrocarbon transporter                         |
| P73_0186  | TetR family transcriptional regulator                               |
| P73_0187  | acyl-CoA dehydrogenase-like protein                                 |
| P73_0225  | membrane DoxD-like family protein                                   |
| P73_0226  | Predicted xylanase/chitin deacetylase                               |
| P73_0227  | xylose isomerase domain-containing protein                          |
| P73_0230  | ribose ABC transporter substrate-binding protein                    |

|          |                                                     |
|----------|-----------------------------------------------------|
| P73_0232 | antibiotic biosynthesis monooxygenase               |
| P73_0233 | MarR family transcriptional regulator               |
| P73_0302 | molybdate ABC transporter permease                  |
| P73_0307 | MarR family transcriptional regulator               |
| P73_0310 | Protein of unknown function DUF262                  |
| P73_0311 | transposase IS66                                    |
| P73_0312 | IS66 Orf2 family protein                            |
| P73_0313 | transposase IS3/IS911 family protein                |
| P73_0314 | HsdR family type I site-specific deoxyribonuclease  |
| P73_0315 | Protein of unknown function (DUF2384)               |
| P73_0324 | sodium:dicarboxylate symporter                      |
| P73_0325 | putative transposase for insertion sequence element |
| P73_0327 | IcIR family transcriptional regulator               |
| P73_0329 | homogentisate 1,2-dioxygenase                       |
| P73_0330 | fumarylacetoacetate hydrolase family protein        |
| P73_0331 | maleylacetoacetate isomerase MaiA                   |
| P73_0332 | LysR family transcriptional regulator               |
| P73_0333 | cytochrome P450                                     |
| P73_0337 | MarR family transcriptional regulator               |
| P73_0338 | long-chain-fatty-acid--CoA ligase                   |
| P73_0340 | hypothetical protein                                |
| P73_0341 | thiolase                                            |
| P73_0342 | family 7 extracellular solute-binding protein       |
| P73_0343 | TRAP dicarboxylate transporter subunit DctQ         |
| P73_0346 | IPB-dioxygenase, ISP large subunit                  |
| P73_0347 | Biphenyl 2,3-dioxygenase subunit beta               |
| P73_0348 | phenylpropionate dioxygenase ferredoxin subunit     |
| P73_0350 | dehydrogenase PhnF                                  |
| P73_0351 | dihydrodipicolinate synthetase                      |
| P73_0352 | 2-hydroxychromene-2-carboxylate isomerase           |
| P73_0353 | catechol 2,3-dioxygenase                            |
| P73_0355 | OmpW family protein                                 |
| P73_0356 | glutathione S-transferase domain-containing protein |
| P73_0357 | MarR family transcriptional regulator               |
| P73_0358 | L-2,4-diaminobutyric acid acetyltransferase         |
| P73_0360 | L-ectoine synthase                                  |
| P73_0361 | aspartate kinase                                    |
| P73_0362 | Crp/Fnr family transcriptional regulator            |
| P73_0368 | 3-octaprenyl-4-hydroxybenzoate carboxy-lyase        |
| P73_0369 | 3-octaprenyl-4-hydroxybenzoate carboxy-lyase        |
| P73_0373 | Domain of unknown function (DUF4145)                |
| P73_0374 | hypothetical protein                                |
| P73_0429 | Sodium/proline symporter                            |

|          |                                                            |
|----------|------------------------------------------------------------|
| P73_0431 | hypothetical protein                                       |
| P73_0432 | cyclic nucleotide-binding protein                          |
| P73_0438 | Putative amidoligase enzyme                                |
| P73_0453 | Arabinose efflux permease                                  |
| P73_0460 | hypothetical protein                                       |
| P73_0462 | hypothetical protein                                       |
| P73_0467 | putative transposase                                       |
| P73_0469 | universal stress protein                                   |
| P73_0473 | Uncharacterized iron-regulated membrane protein            |
| P73_0472 | transposase                                                |
| P73_0474 | transposase                                                |
| P73_0475 | Uncharacterized iron-regulated membrane protein            |
| P73_0476 | hypothetical protein                                       |
| P73_0479 | hypothetical protein                                       |
| P73_0480 | phosphoglycerate mutase                                    |
| P73_0481 | precorrin 6A synthase                                      |
| P73_0485 | precorrin methylase                                        |
| P73_0491 | precorrin-3B synthase                                      |
| P73_0494 | Predicted metal-binding protein                            |
| P73_0495 | LysR family transcriptional regulator                      |
| P73_0496 | inner-membrane translocator                                |
| P73_0497 | ABC transporter substrate-binding protein                  |
| P73_0498 | ABC transporter                                            |
| P73_0499 | hypothetical protein                                       |
| P73_0501 | 3-hydroxybutyryl-CoA dehydrogenase                         |
| P73_0502 | alcohol dehydrogenase                                      |
| P73_0503 | putative periplasmic substrate binding protein             |
| P73_0504 | TRAP-type C4-dicarboxylate transport system small permease |
| P73_0505 | TRAP dicarboxylate transporter                             |
| P73_0520 | transposase                                                |
| P73_0519 | hypothetical protein                                       |
| P73_0521 | transposase                                                |
| P73_0522 | transposase                                                |
| P73_0530 | cytochrome c'                                              |
| P73_0531 | Peptidase inhibitor I78 family                             |
| P73_0658 | bacterioferritin                                           |
| P73_0659 | hypothetical protein                                       |
| P73_0700 | Polysaccharide pyruvyl transferase                         |
| P73_0701 | group 1 glycosyl transferase                               |
| P73_0702 | hypothetical protein                                       |
| P73_0703 | polysaccharide export protein, translocase                 |
| P73_0704 | O-antigen ligase like membrane protein                     |
| P73_0705 | hypothetical protein                                       |

|          |                                                            |
|----------|------------------------------------------------------------|
| P73_0706 | hypothetical protein                                       |
| P73_0707 | hypothetical protein                                       |
| P73_0708 | glycosyl transferase group 1                               |
| P73_0710 | family 2 glycosyl transferase                              |
| P73_0711 | putative Glycosyl transferase, group 1                     |
| P73_0712 | acyltransferase 3                                          |
| P73_0719 | group 1 glycosyl transferase                               |
| P73_0720 | conserved hypothetical protein                             |
| P73_0723 | Thiamine biosynthesis protein ThiS                         |
| P73_0728 | EmrB/QacA family drug resistance transporter               |
| P73_0729 | multidrug resistance protein K                             |
| P73_0730 | TetR family transcriptional regulator                      |
| P73_0738 | OmpA/MotB domain-containing protein                        |
| P73_0757 | hypothetical protein                                       |
| P73_0759 | transposase                                                |
| P73_0760 | transposase                                                |
| P73_0766 | Lipid A 3-O-deacylase (PagL)                               |
| P73_0820 | hypothetical protein                                       |
| P73_0822 | Uncharacterized protein conserved in bacteria              |
| P73_0827 | Formate/nitrite family of transporters                     |
| P73_0828 | PRC-barrel domain                                          |
| P73_0829 | Uncharacterized protein conserved in bacteria              |
| P73_0830 | Uncharacterized stress protein (general stress protein 26) |
| P73_0832 | radical SAM family protein                                 |
| P73_0834 | hypothetical protein                                       |
| P73_0835 | putative two-component response regulator                  |
| P73_0874 | hypothetical protein                                       |
| P73_0918 | hybrid cluster protein-associated redox disulfide domain   |
| P73_0923 | hypothetical protein                                       |
| P73_0924 | hypothetical protein                                       |
| P73_0927 | hypothetical protein                                       |
| P73_0934 | hypothetical protein                                       |
| P73_0936 | McrBC 5-methylcytosine restriction system component        |
| P73_0937 | ATPase AAA                                                 |
| P73_0938 | Filamentation induced by cAMP protein Fic                  |
| P73_0939 | DEAD/DEAH box helicase                                     |
| P73_0940 | ORF-3 family protein                                       |
| P73_0941 | histone family protein nucleoid-structuring protein H-NS   |
| P73_0945 | hypothetical protein                                       |
| P73_0946 | Uncharacterized conserved protein                          |
| P73_0949 | HNS-type DNA binding protein                               |
| P73_0950 | hypothetical protein                                       |
| P73_0951 | hypothetical protein                                       |



|          |                                                                    |
|----------|--------------------------------------------------------------------|
| P73_0952 | universal stress protein                                           |
| P73_0960 | hypothetical protein                                               |
| P73_0964 | replicative DNA helicase                                           |
| P73_0965 | transmembrane protein                                              |
| P73_0966 | hypothetical protein                                               |
| P73_0970 | hypothetical protein                                               |
| P73_0983 | hypothetical protein                                               |
| P73_1001 | hypothetical protein                                               |
| P73_1005 | S-isoprenylcysteine methyltransferase-like protein                 |
| P73_1007 | Uncharacterized protein conserved in bacteria                      |
| P73_1017 | hypothetical protein                                               |
| P73_1021 | Predicted kinase                                                   |
| P73_1022 | transposase, mutator type                                          |
| P73_1024 | hypothetical protein                                               |
| P73_1025 | hypothetical protein                                               |
| P73_1026 | Uncharacterized conserved protein (DUF2285)                        |
| P73_1029 | transposase                                                        |
| P73_1030 | transposase, orfB                                                  |
| P73_1031 | transposase IS3/IS911 family protein                               |
| P73_1032 | Ubiquinone/menaquinone biosynthesis methyltransferase              |
| P73_1037 | transposase                                                        |
| P73_1038 | transposase                                                        |
| P73_1039 | binding-protein-dependent transporter inner membrane component     |
| P73_1041 | NMT1/THI5-like domain-containing protein                           |
| P73_1042 | methenyltetrahydrofolate synthetase                                |
| P73_1043 | RpiR family transcriptional regulator                              |
| P73_1044 | EmrB/QacA family drug resistance transporter                       |
| P73_1045 | oligopeptide ABC transporter oligopeptide-binding protein          |
| P73_1049 | ammonia monooxygenase                                              |
| P73_1050 | MmgE/PrpD family protein                                           |
| P73_1051 | aromatic-ring-hydroxylating dioxygenase, ferredoxin subunit        |
| P73_1053 | Rieske (2Fe-2S) protein                                            |
| P73_1055 | FabG                                                               |
| P73_1056 | hypothetical protein                                               |
| P73_1057 | TRAP-type C4-dicarboxylate transport system, periplasmic component |
| P73_1058 | Transposase DDE domain group 1                                     |
| P73_1072 | NAD synthetase                                                     |
| P73_1086 | Predicted permeases                                                |
| P73_1087 | hypothetical protein                                               |
| P73_1089 | TetR family transcriptional regulator                              |
| P73_1090 | NAD-dependent epimerase/dehydratase                                |
| P73_1091 | XRE family transcriptional regulator                               |
| P73_1092 | Mn+2/Fe+2 ABC transporter substrate-binding protein SitA           |

|          |                                                                                         |
|----------|-----------------------------------------------------------------------------------------|
| P73_1093 | Mn+2/Fe+2 ABC transporter ATPase SitB                                                   |
| P73_1094 | ABC-3 protein                                                                           |
| P73_1095 | Mn+2/Fe+2 ABC transporter inner membrane protein SitD                                   |
| P73_1096 | heme oxygenase-like protein                                                             |
| P73_1097 | heme receptor                                                                           |
| P73_1098 | protein fecR                                                                            |
| P73_1100 | lipoprotein                                                                             |
| P73_1103 | binding-protein-dependent transport system inner membrane protein                       |
| P73_1104 | binding-protein-dependent transport system inner membrane protein                       |
| P73_1105 | extracellular solute-binding protein                                                    |
| P73_1106 | AraC family transcriptional regulator                                                   |
| P73_1107 | Protein of unknown function (DUF2000)                                                   |
| P73_1111 | NADP oxidoreductase coenzyme F420-dependent                                             |
| P73_1112 | alcohol dehydrogenase zinc-binding domain-containing protein                            |
| P73_1116 | TetR family transcriptional regulator                                                   |
| P73_1123 | transporter                                                                             |
| P73_1125 | aliphatic sulfonate ABC transporter substrate-binding protein                           |
| P73_1126 | aliphatic sulfonate ABC transporter permease                                            |
| P73_1127 | coenzyme F420-dependent N5 N10-methylene tetrahydromethanopterin reductase-like protein |
| P73_1128 | taurine dioxygenase                                                                     |
| P73_1129 | NADPH-dependent FMN reductase                                                           |
| P73_1130 | FAD dependent oxidoreductase                                                            |
| P73_1131 | Predicted esterase of the alpha/beta hydrolase fold                                     |
| P73_1132 | sodium-dependent inorganic phosphate (Pi) transporter                                   |
| P73_1134 | sulfate ABC transporter permease                                                        |
| P73_1135 | sulfate ABC transporter inner membrane subunit CysT                                     |
| P73_1136 | sulfate ABC transporter substrate-binding protein                                       |
| P73_1138 | AsnC family transcriptional regulator                                                   |
| P73_1139 | hypothetical protein                                                                    |
| P73_1142 | hypothetical protein                                                                    |
| P73_1143 | sulfate ABC transporter, inner membrane subunit CysT                                    |
| P73_1144 | sulfate adenylyltransferase                                                             |
| P73_1145 | BadM/Rrf2 family transcriptional regulator                                              |
| P73_1158 | ribonucleoside-diphosphate reductase class Ib glutaredoxin subunit                      |
| P73_1159 | ribonucleotide reductase stimulatory protein                                            |
| P73_1160 | ribonucleotide-diphosphate reductase subunit alpha                                      |
| P73_1161 | ribonucleotide-diphosphate reductase subunit beta                                       |
| P73_1174 | hypothetical protein                                                                    |
| P73_1200 | trans-aconitate 2-methyltransferase                                                     |
| P73_1203 | putative phosphoesterase                                                                |
| P73_1204 | DEAD/DEAH box helicase                                                                  |
| P73_1223 | GSCFA family                                                                            |

|          |                                                                                  |
|----------|----------------------------------------------------------------------------------|
| P73_1238 | Predicted Zn-dependent hydrolases of the beta-lactamase fold                     |
| P73_1243 | Branched-chain amino acid aminotransferase/4-amino-4-deoxychorismate lyase       |
| P73_1254 | hypothetical protein                                                             |
| P73_1255 | ArsR family transcriptional regulator                                            |
| P73_1256 | ACR3 family arsenite efflux pump                                                 |
| P73_1257 | arsenate reductase                                                               |
| P73_1265 | fructosamine/ketosamine-3-kinase                                                 |
| P73_1283 | phage integrase                                                                  |
| P73_1284 | tail tape measure protein, TP901 family                                          |
| P73_1285 | putative transposase for insertion sequence element                              |
| P73_1286 | hypothetical protein                                                             |
| P73_1287 | carbohydrate-binding family V/XII                                                |
| P73_1288 | hypothetical protein                                                             |
| P73_1289 | hypothetical protein                                                             |
| P73_1290 | hypothetical protein                                                             |
| P73_1291 | glycoside hydrolase family protein                                               |
| P73_1292 | hypothetical protein                                                             |
| P73_1293 | hypothetical protein                                                             |
| P73_1296 | major facilitator superfamily protein                                            |
| P73_1297 | transcriptional regulator                                                        |
| P73_1299 | isochorismatase family protein                                                   |
| P73_1302 | hypothetical protein                                                             |
| P73_1313 | oxidoreductase FAD/NAD(P)-binding subunit                                        |
| P73_1325 | Appr-1-p processing protein                                                      |
| P73_1327 | Uncharacterized protein conserved in bacteria                                    |
| P73_1331 | hypothetical protein                                                             |
| P73_1332 | BLUF domain-containing protein                                                   |
| P73_1339 | Uncharacterized protein conserved in bacteria                                    |
| P73_1341 | Uncharacterized enzyme involved in biosynthesis of extracellular polysaccharides |
| P73_1350 | Uncharacterized protein conserved in bacteria                                    |
| P73_1352 | phage head morphogenesis domain-containing protein                               |
| P73_1353 | transposase IS116/IS110/IS902 family protein                                     |
| P73_1355 | transposase, IS4 family protein                                                  |
| P73_1356 | Protein of unknown function (DUF1436)                                            |
| P73_1357 | Protein of unknown function (DUF1436)                                            |
| P73_1358 | Protein of unknown function (DUF1436)                                            |
| P73_1363 | hypothetical protein                                                             |
| P73_1364 | ribose ABC transporter periplasmic binding protein                               |
| P73_1366 | ribose ABC transporter permease                                                  |
| P73_1367 | lactoylglutathione lyase-like protein                                            |
| P73_1369 | binding-protein-dependent transport systems inner membrane component             |
| P73_1370 | ABC transporter permease                                                         |
| P73_1371 | ABC transporter substrate binding protein                                        |

|          |                                                                                  |
|----------|----------------------------------------------------------------------------------|
| P73_1374 | Short chain dehydrogenase                                                        |
| P73_1375 | transcriptional regulator                                                        |
| P73_1376 | transcriptional regulator                                                        |
| P73_1379 | C4-dicarboxylate transport system (Permease small protein)                       |
| P73_1381 | acetaldehyde dehydrogenase                                                       |
| P73_1382 | 4-hydroxy-2-oxovalerate/4-hydroxy-2-oxopentanoic acid aldolase                   |
| P73_1383 | hypothetical protein                                                             |
| P73_1384 | hypothetical protein                                                             |
| P73_1385 | HipA domain-containing protein                                                   |
| P73_1386 | LysR family transcriptional regulator                                            |
| P73_1387 | allantoinase                                                                     |
| P73_1389 | OsrF                                                                             |
| P73_1390 | urocanate hydratase                                                              |
| P73_1391 | DctP                                                                             |
| P73_1392 | tripartite ATP-independent periplasmic transporter DctQ                          |
| P73_1395 | acyl-CoA dehydrogenase                                                           |
| P73_1396 | short-chain specific acyl-CoA dehydrogenase                                      |
| P73_1399 | SNF2-related:helicase, C-terminal:type III restriction enzyme                    |
| P73_1402 | RNA polymerase sigma factor protein (sigma-70)                                   |
| P73_1403 | Uncharacterized protein conserved in bacteria                                    |
| P73_1405 | Uncharacterized conserved protein                                                |
| P73_1406 | Transcriptional regulator                                                        |
| P73_1407 | major facilitator superfamily transporter                                        |
| P73_1408 | HlyD family secretion protein                                                    |
| P73_1418 | Domain of unknown function (DUF4272)                                             |
| P73_1422 | hypothetical protein                                                             |
| P73_1423 | Reverse transcriptase (RNA-dependent DNA polymerase)                             |
| P73_1424 | hypothetical protein                                                             |
| P73_1425 | hypothetical protein                                                             |
| P73_1426 | hypothetical protein                                                             |
| P73_1427 | hypothetical protein                                                             |
| P73_1428 | hypothetical protein                                                             |
| P73_1430 | Bifunctional DNA primase/polymerase, N-terminal                                  |
| P73_1431 | transcriptional regulator                                                        |
| P73_1432 | hypothetical protein                                                             |
| P73_1433 | phage integrase                                                                  |
| P73_1434 | alkanesulfonate monooxygenase                                                    |
| P73_1435 | Alkanesulfonate monooxygenase                                                    |
| P73_1436 | ABC-type Fe <sup>3+</sup> transport system, substrate binding component          |
| P73_1438 | binding-protein-dependent transport system inner membrane protein                |
| P73_1439 | ABC-type nitrate/sulfonate/bicarbonate transport systems, periplasmic components |
| P73_1441 | binding-protein-dependent transporter inner membrane component                   |
| P73_1442 | aliphatic sulfonates family ABC transporter periplasmic ligand-binding protein   |

|          |                                                                    |
|----------|--------------------------------------------------------------------|
| P73_1490 | hypothetical protein                                               |
| P73_1491 | Uncharacterized conserved protein                                  |
| P73_1492 | Small integral membrane protein                                    |
| P73_1493 | two-component response regulator                                   |
| P73_1494 | hypothetical protein                                               |
| P73_1496 | sensor signal transduction histidine kinase                        |
| P73_1516 | transposase                                                        |
| P73_1519 | Predicted membrane protein                                         |
| P73_1538 | glycosyl transferase                                               |
| P73_1539 | citrate transporter                                                |
| P73_1553 | hypothetical protein                                               |
| P73_1564 | hypothetical protein                                               |
| P73_1595 | Predicted transcriptional regulators                               |
| P73_1596 | hypothetical protein                                               |
| P73_1605 | hypothetical protein                                               |
| P73_1615 | hypothetical protein                                               |
| P73_1619 | phospholipase, patatin family protein                              |
| P73_1620 | hypothetical protein                                               |
| P73_1645 | putative IS256 family transposase                                  |
| P73_1647 | mannonate dehydratase                                              |
| P73_1649 | mannonate dehydratase                                              |
| P73_1650 | GntR family transcriptional regulator                              |
| P73_1651 | 5-dehydro-4-deoxyglucarate dehydratase                             |
| P73_1652 | oligopeptide ABC transporter substrate binding protein             |
| P73_1657 | N-acylglucosamine 2-epimerase                                      |
| P73_1658 | putative sugar isomerase                                           |
| P73_1659 | short chain dehydrogenase                                          |
| P73_1660 | DeoR family transcriptional regulator                              |
| P73_1661 | rhamnose ABC transporter periplasmic rhamnose-binding protein RhaS |
| P73_1663 | putative-binding-protein-dependent transport system permease       |
| P73_1664 | sugar ABC transporter permease                                     |
| P73_1665 | Uncharacterized conserved protein                                  |
| P73_1666 | carbohydrate kinase                                                |
| P73_1681 | ion transport 2 family protein                                     |
| P73_1682 | hypothetical protein                                               |
| P73_1700 | Glycosyltransferases, probably involved in cell wall biogenesis    |
| P73_1701 | Domain of unknown function (DUF4174)                               |
| P73_1717 | putative arylesterase                                              |
| P73_1737 | hypothetical protein                                               |
| P73_1738 | monooxygenase                                                      |
| P73_1750 | hypothetical protein                                               |
| P73_1751 | hypothetical protein                                               |
| P73_1752 | Predicted transcriptional regulator                                |

|          |                                                                           |
|----------|---------------------------------------------------------------------------|
| P73_1753 | hypothetical protein                                                      |
| P73_1765 | CopG family transcriptional regulator                                     |
| P73_1767 | LysR family transcriptional regulator                                     |
| P73_1768 | TetR family transcriptional regulator                                     |
| P73_1769 | multidrug resistance protein A                                            |
| P73_1770 | major facilitator transporter                                             |
| P73_1771 | TetR family transcriptional regulator                                     |
| P73_1772 | TetR family transcriptional regulator                                     |
| P73_1773 | Domain of Unknown Function with PDB structure (DUF3861)                   |
| P73_1774 | dihydropteroic synthetase                                                 |
| P73_1787 | Uncharacterized conserved protein (DUF2285)                               |
| P73_1788 | hypothetical protein                                                      |
| P73_1792 | Plasmid stability protein                                                 |
| P73_1793 | hypothetical protein                                                      |
| P73_1795 | helix-turn-helix domain-containing protein                                |
| P73_1796 | type I restriction-modification system M subunit                          |
| P73_1797 | restriction modification system DNA specificity domain-containing protein |
| P73_1798 | SMC protein, N-terminal domain-containing protein                         |
| P73_1799 | hypothetical protein                                                      |
| P73_1801 | hypothetical protein                                                      |
| P73_1802 | hypothetical protein                                                      |
| P73_1803 | recombinase                                                               |
| P73_1804 | Protein of unknown function (DUF2924)                                     |
| P73_1805 | Predicted Zn peptidase                                                    |
| P73_1806 | helix-hairpin-helix DNA-binding motif-containing protein                  |
| P73_1807 | Uncharacterized protein conserved in bacteria (DUF2188)                   |
| P73_1808 | hypothetical protein                                                      |
| P73_1809 | hypothetical protein                                                      |
| P73_1810 | Nucleotidyl transferase of unknown function (DUF1814)                     |
| P73_1811 | Domain of unknown function (DUF4095)                                      |
| P73_1813 | hypothetical protein                                                      |
| P73_1814 | AAA domain                                                                |
| P73_1815 | Protein of unknown function (DUF669)                                      |
| P73_1816 | hypothetical protein                                                      |
| P73_1817 | hypothetical protein                                                      |
| P73_1818 | superfamily II DNA/RNA helicase                                           |
| P73_1819 | hypothetical protein                                                      |
| P73_1820 | hypothetical protein                                                      |
| P73_1821 | hypothetical protein                                                      |
| P73_1822 | hypothetical protein                                                      |
| P73_1823 | modification methylase DpnIIB                                             |
| P73_1824 | putative site-specific DNA methylase                                      |
| P73_1825 | hypothetical protein                                                      |

|          |                                                                           |
|----------|---------------------------------------------------------------------------|
| P73_1826 | Protein of unknown function (DUF3489)                                     |
| P73_1827 | hypothetical protein                                                      |
| P73_1828 | hypothetical protein                                                      |
| P73_1829 | terminase small subunit, Nu1                                              |
| P73_1830 | phage terminase large subunit (GpA)                                       |
| P73_1831 | hypothetical protein                                                      |
| P73_1832 | phage portal protein, lambda family                                       |
| P73_1833 | peptidase U35 phage prohead HK97                                          |
| P73_1834 | Uncharacterized conserved protein                                         |
| P73_1835 | hypothetical protein                                                      |
| P73_1836 | hypothetical protein                                                      |
| P73_1837 | hypothetical protein                                                      |
| P73_1838 | hypothetical protein                                                      |
| P73_1839 | hypothetical protein                                                      |
| P73_1840 | Lambda phage tail tape-measure protein (Tape_meas_lam_C)                  |
| P73_1842 | hypothetical protein                                                      |
| P73_1843 | hypothetical protein                                                      |
| P73_1844 | lysozyme                                                                  |
| P73_1845 | hypothetical protein                                                      |
| P73_1852 | Type I site-specific deoxyribonuclease, HsdR family protein               |
| P73_1853 | serine/threonine protein kinase                                           |
| P73_1854 | hypothetical protein                                                      |
| P73_1855 | hypothetical protein                                                      |
| P73_1856 | peptidase M15A                                                            |
| P73_1857 | hypothetical protein                                                      |
| P73_1858 | transposase IS116/IS110/IS902 family protein                              |
| P73_1859 | hypothetical protein                                                      |
| P73_1860 | Uncharacterized conserved protein (DUF2285)                               |
| P73_1861 | hypothetical protein                                                      |
| P73_1865 | Plasmid stability protein                                                 |
| P73_1866 | hypothetical protein                                                      |
| P73_1868 | helix-turn-helix domain-containing protein                                |
| P73_1869 | type I restriction-modification system M subunit                          |
| P73_1870 | restriction modification system DNA specificity domain-containing protein |
| P73_1871 | SMC protein, N-terminal domain-containing protein                         |
| P73_1872 | hypothetical protein                                                      |
| P73_1874 | hypothetical protein                                                      |
| P73_1875 | hypothetical protein                                                      |
| P73_1876 | recombinase                                                               |
| P73_1877 | Protein of unknown function (DUF2924)                                     |
| P73_1878 | Predicted Zn peptidase                                                    |
| P73_1879 | helix-hairpin-helix DNA-binding motif-containing protein                  |
| P73_1880 | Uncharacterized protein conserved in bacteria (DUF2188)                   |

|          |                                                             |
|----------|-------------------------------------------------------------|
| P73_1881 | hypothetical protein                                        |
| P73_1882 | hypothetical protein                                        |
| P73_1883 | Nucleotidyl transferase of unknown function (DUF1814)       |
| P73_1884 | Domain of unknown function (DUF4095)                        |
| P73_1886 | hypothetical protein                                        |
| P73_1887 | AAA domain                                                  |
| P73_1888 | Protein of unknown function (DUF669)                        |
| P73_1889 | hypothetical protein                                        |
| P73_1890 | hypothetical protein                                        |
| P73_1891 | superfamily II DNA/RNA helicase                             |
| P73_1892 | hypothetical protein                                        |
| P73_1893 | hypothetical protein                                        |
| P73_1894 | hypothetical protein                                        |
| P73_1895 | hypothetical protein                                        |
| P73_1896 | modification methylase DpnIIB                               |
| P73_1897 | putative site-specific DNA methylase                        |
| P73_1898 | hypothetical protein                                        |
| P73_1899 | Protein of unknown function (DUF3489)                       |
| P73_1900 | hypothetical protein                                        |
| P73_1901 | hypothetical protein                                        |
| P73_1902 | terminase small subunit, Nu1                                |
| P73_1903 | phage terminase large subunit (GpA)                         |
| P73_1904 | hypothetical protein                                        |
| P73_1905 | phage portal protein, lambda family                         |
| P73_1906 | peptidase U35 phage prohead HK97                            |
| P73_1907 | Uncharacterized conserved protein                           |
| P73_1908 | hypothetical protein                                        |
| P73_1909 | hypothetical protein                                        |
| P73_1910 | hypothetical protein                                        |
| P73_1911 | hypothetical protein                                        |
| P73_1912 | hypothetical protein                                        |
| P73_1913 | Lambda phage tail tape-measure protein (Tape_meas_lam_C)    |
| P73_1915 | hypothetical protein                                        |
| P73_1916 | hypothetical protein                                        |
| P73_1917 | lysozyme                                                    |
| P73_1918 | hypothetical protein                                        |
| P73_1925 | Type I site-specific deoxyribonuclease, HsdR family protein |
| P73_1926 | serine/threonine protein kinase                             |
| P73_1927 | hypothetical protein                                        |
| P73_1928 | hypothetical protein                                        |
| P73_1929 | peptidase M15A                                              |
| P73_1930 | hypothetical protein                                        |
| P73_1932 | transposase, IS4 family protein                             |



|          |                                                                 |
|----------|-----------------------------------------------------------------|
| P73_1933 | hypothetical protein                                            |
| P73_1936 | heavy metal transport/detoxification protein                    |
| P73_1937 | Uncharacterized protein conserved in bacteria                   |
| P73_1940 | type 12 methyltransferase                                       |
| P73_1941 | hypothetical protein                                            |
| P73_1942 | Resolvase                                                       |
| P73_1943 | Inosine/uridine-preferring nucleoside hydrolase                 |
| P73_1944 | RpiR family transcriptional regulator                           |
| P73_1945 | twin-arginine translocation pathway signal                      |
| P73_1946 | twin-arginine translocation pathway signal                      |
| P73_1947 | S-adenosylhomocysteine deaminase, methylthioadenosine deaminase |
| P73_1949 | nitrate/sulfonate/bicarbonate ABC transporter permease          |
| P73_1950 | ABC transporter-like protein permease                           |
| P73_1951 | nucleoside 2-deoxyribosyltransferase                            |
| P73_1952 | transposase, mutator type                                       |
| P73_1955 | cytosine deaminase-like protein metal-dependent hydrolase       |
| P73_1960 | hypothetical protein                                            |
| P73_1961 | hypothetical protein                                            |
| P73_1962 | hypothetical protein                                            |
| P73_1963 | hypothetical protein                                            |
| P73_1964 | hypothetical protein                                            |
| P73_1965 | hypothetical protein                                            |
| P73_1966 | hypothetical protein                                            |
| P73_1967 | hypothetical protein                                            |
| P73_1968 | PIN domain-containing protein                                   |
| P73_1969 | AbrB family transcriptional regulator                           |
| P73_1970 | Predicted transcriptional regulator                             |
| P73_1974 | Predicted permease                                              |
| P73_1977 | polysaccharide deacetylase                                      |
| P73_1978 | helix-turn-helix domain-containing protein                      |
| P73_1979 | transposase                                                     |
| P73_1980 | transposase                                                     |
| P73_1981 | Uncharacterized conserved protein                               |
| P73_1982 | activator of Hsp90 ATPase 1 family protein                      |
| P73_1984 | regulatory protein, IclR                                        |
| P73_1985 | TRAP dicarboxylate transporter, DctP subunit                    |
| P73_1986 | tripartite ATP-independent periplasmic transporter DctQ         |
| P73_1988 | dihydroorotate dehydrogenase                                    |
| P73_1989 | hypothetical protein                                            |
| P73_1990 | HpcH/HpaI aldolase                                              |
| P73_1991 | cupin 2 barrel domain-containing protein                        |
| P73_1994 | LysR family transcriptional regulator                           |
| P73_1995 | putative luciferase-like monooxygenase                          |

|          |                                                                       |
|----------|-----------------------------------------------------------------------|
| P73_1996 | monooxygenase                                                         |
| P73_1999 | extracellular solute-binding protein                                  |
| P73_2000 | major facilitator superfamily transporter                             |
| P73_2002 | Uncharacterized protein involved in propionate catabolism             |
| P73_2004 | NADPH-dependent FMN reductase                                         |
| P73_2005 | flavin-dependent reductase                                            |
| P73_2007 | biotin sulfoxide reductase                                            |
| P73_2009 | Tripartite tricarboxylate transporter TctB family                     |
| P73_2012 | MaoC-like dehydratase                                                 |
| P73_2013 | Uncharacterized protein conserved in bacteria                         |
| P73_2014 | putative sensor histidine kinase                                      |
| P73_2016 | hypothetical protein                                                  |
| P73_2017 | hypothetical protein                                                  |
| P73_2018 | Uncharacterized protein conserved in bacteria                         |
| P73_2019 | transcriptional regulator                                             |
| P73_2020 | 6-phosphogluconate dehydrogenase                                      |
| P73_2022 | bleomycin resistance protein                                          |
| P73_2023 | Alpha/beta hydrolase family                                           |
| P73_2024 | alpha/beta hydrolase fold protein                                     |
| P73_2026 | binding-protein-dependent transport system inner membrane protein     |
| P73_2027 | iron(III) ABC transporter iron (III)-binding protein                  |
| P73_2029 | LysR family transcriptional regulator                                 |
| P73_2030 | putative oxidoreductase protein                                       |
| P73_2033 | taurine catabolism dioxygenase TauD/TfdA                              |
| P73_2034 | NMT1/THI5-like domain-containing protein                              |
| P73_2038 | isoleucine patch superfamily carbonic anhydrase/acetyltransferase     |
| P73_2040 | replicative DNA helicase                                              |
| P73_2041 | HNH endonuclease domain-containing protein                            |
| P73_2042 | hypothetical protein                                                  |
| P73_2043 | ABC transporter substrate-binding protein                             |
| P73_2044 | ABC transporter substrate-binding protein                             |
| P73_2045 | putative ribulose-5-phosphate 4-epimerase-like epimerase              |
| P73_2046 | LysR family transcriptional regulator                                 |
| P73_2047 | ABC transporter substrate-binding protein                             |
| P73_2049 | binding-protein-dependent transport system inner membrane protein     |
| P73_2050 | TRAP dicarboxylate transporter subunit DctP                           |
| P73_2051 | TRAP-type C4-dicarboxylate transport system, small permease component |
| P73_2053 | aldo/keto reductase                                                   |
| P73_2055 | polar amino acid ABC transporter inner membrane subunit               |
| P73_2058 | extracellular solute-binding protein                                  |
| P73_2059 | SMP-30/gluconolactonase/LRE domain-containing protein                 |
| P73_2061 | putative glyoxalase                                                   |
| P73_2062 | acetolactate synthase, large chain related protein                    |

|          |                                                                                       |
|----------|---------------------------------------------------------------------------------------|
| P73_2063 | amidohydrolase                                                                        |
| P73_2064 | flavoprotein                                                                          |
| P73_2065 | hypothetical protein                                                                  |
| P73_2066 | polysaccharide deacetylase                                                            |
| P73_2069 | short-chain aldo-keto oxidoreductase                                                  |
| P73_2070 | ABC transporter substrate-binding protein                                             |
| P73_2071 | TRAP transport system, small permease protein                                         |
| P73_2074 | aliphatic sulfonate ABC transporter periplasmic ligand-binding protein                |
| P73_2075 | transposase, IS4 family protein                                                       |
| P73_2077 | transposase IS116/IS110/IS902 family protein                                          |
| P73_2078 | aliphatic sulfonate ABC transporter periplasmic ligand-binding protein                |
| P73_2081 | alkanesulfonate monooxygenase                                                         |
| P73_2082 | taurine transport system permease                                                     |
| P73_2084 | taurine ABC transporter periplasmic binding protein                                   |
| P73_2086 | hypothetical protein                                                                  |
| P73_2087 | Uncharacterized protein conserved in bacteria                                         |
| P73_2088 | TRAP-type mannitol/chloroaromatic compound transport system, small permease component |
| P73_2090 | TRAP dicarboxylate transporter- DctP subunit                                          |
| P73_2091 | AraC family transcriptional regulator                                                 |
| P73_2092 | regulatory protein LuxR                                                               |
| P73_2093 | putative cyclase                                                                      |
| P73_2096 | TRAP dicarboxylate transporter subunit DctM                                           |
| P73_2098 | putative periplasmic substrate binding protein                                        |
| P73_2099 | putative transcriptional regulator                                                    |
| P73_2100 | UDP-glucose 4-epimerase                                                               |
| P73_2101 | Predicted metal-dependent enzyme of the double-stranded beta helix superfamily        |
| P73_2102 | Uncharacterized conserved protein                                                     |
| P73_2105 | periplasmic binding protein                                                           |
| P73_2106 | esterase                                                                              |
| P73_2107 | enterobactin synthase subunit F                                                       |
| P73_2108 | phosphopantetheine-binding protein                                                    |
| P73_2109 | AMP-dependent synthetase and ligase                                                   |
| P73_2110 | TRAP dicarboxylate transporter subunit DctQ                                           |
| P73_2112 | TRAP transporter-DctP subunit                                                         |
| P73_2114 | TonB-dependent receptor precursor                                                     |
| P73_2115 | MarR family transcriptional regulator                                                 |
| P73_2116 | alkyl hydroperoxide reductase/ thiol specific antioxidant/ Mal allergen               |
| P73_2117 | FAD-dependent pyridine nucleotide-disulfide oxidoreductase                            |
| P73_2118 | ferredoxin                                                                            |
| P73_2120 | ABC transporter permease                                                              |
| P73_2121 | aliphatic sulfonates ABC transporter substrate-binding protein                        |
| P73_2122 | drug resistance transporter, EmrB/QacA subfamily protein                              |

|          |                                                                                    |
|----------|------------------------------------------------------------------------------------|
| P73_2123 | dehydrogenase                                                                      |
| P73_2128 | acetyltransferase                                                                  |
| P73_2129 | putative amino-acid ABC transporter, periplasmic solute-binding protein            |
| P73_2132 | Glutathione S-transferase domain protein                                           |
| P73_2134 | NMT1/THI5-like domain-containing protein                                           |
| P73_2139 | ABC transporter periplasmic protein                                                |
| P73_2141 | ABC transporter membrane subunit                                                   |
| P73_2142 | Arylsulfotransferase (ASST)                                                        |
| P73_2143 | regulatory protein LacI:Periplasmic binding protein/LacI transcriptional regulator |
| P73_2144 | LysR family transcriptional regulator                                              |
| P73_2147 | thiamine biosynthesis protein                                                      |
| P73_2149 | binding-protein-dependent transport system inner membrane protein                  |
| P73_2150 | aromatic hydrocarbon dioxygenase small subunit                                     |
| P73_2151 | Rieske (2Fe-2S) domain-containing protein                                          |
| P73_2152 | Predicted ester cyclase                                                            |
| P73_2153 | Phytanoyl-CoA dioxygenase (PhyH)                                                   |
| P73_2179 | transposase                                                                        |
| P73_2202 | hypothetical protein                                                               |
| P73_2208 | hypothetical protein                                                               |
| P73_2210 | Uncharacterized membrane protein                                                   |
| P73_2213 | Lysophospholipase                                                                  |
| P73_2214 | GSCFA family                                                                       |
| P73_2215 | hypothetical protein                                                               |
| P73_2238 | Predicted permeases                                                                |
| P73_2252 | hypothetical protein                                                               |
| P73_2260 | transposase                                                                        |
| P73_2261 | transposase                                                                        |
| P73_2263 | hypothetical protein                                                               |
| P73_2265 | hypothetical protein                                                               |
| P73_2266 | hypothetical protein                                                               |
| P73_2267 | Acetyltransferase (GNAT) domain                                                    |
| P73_2268 | Uncharacterized protein conserved in bacteria                                      |
| P73_2271 | hypothetical protein                                                               |
| P73_2272 | Uncharacterized conserved protein (DUF2285)                                        |
| P73_2283 | TetR family transcriptional regulator                                              |
| P73_2284 | Sterol-4-alpha-carboxylate 3-dehydrogenase,decarboxylating                         |
| P73_2285 | LysR family transcriptional regulator                                              |
| P73_2287 | CopG family transcriptional regulator                                              |
| P73_2299 | transcription regulator, TetR family protein                                       |
| P73_2300 | glucose/ribitol short chain dehydrogenase/reductase family protein                 |
| P73_2301 | hypothetical protein                                                               |
| P73_2302 | Predicted transcriptional regulator                                                |
| P73_2303 | Site-specific recombinase                                                          |

|          |                                                                                       |
|----------|---------------------------------------------------------------------------------------|
| P73_2308 | hypothetical protein                                                                  |
| P73_2322 | Nitroreductase                                                                        |
| P73_2323 | Asp/Glu racemase                                                                      |
| P73_2325 | ABC transporter permease                                                              |
| P73_2326 | spermidine/putrescine-binding periplasmic protein                                     |
| P73_2328 | Hydantoinase                                                                          |
| P73_2329 | Uncharacterized conserved protein                                                     |
| P73_2330 | Uncharacterized conserved protein                                                     |
| P73_2331 | transcriptional regulator, LuxR family protein                                        |
| P73_2332 | xenobiotic compound monooxygenase A subunit                                           |
| P73_2334 | hydantoinase A                                                                        |
| P73_2335 | Uncharacterized conserved protein                                                     |
| P73_2336 | twin-arginine translocation pathway signal                                            |
| P73_2348 | hypothetical protein                                                                  |
| P73_2349 | hypothetical protein                                                                  |
| P73_2350 | methyltransferase FkbM                                                                |
| P73_2351 | Uncharacterized conserved protein                                                     |
| P73_2355 | hypothetical protein                                                                  |
| P73_2362 | NADH:flavin oxidoreductase                                                            |
| P73_2363 | Acetoacetate decarboxylase (ADC)                                                      |
| P73_2364 | alpha/beta hydrolase                                                                  |
| P73_2365 | putative non-heme chloroperoxidase                                                    |
| P73_2368 | transcriptional regulator                                                             |
| P73_2378 | TetR family transcriptional regulator                                                 |
| P73_2379 | putative sulfate ester transport system substrate-binding protein                     |
| P73_2380 | binding-protein-dependent transport system inner membrane protein                     |
| P73_2381 | putative alkanesulfonate transport protein, ABC superfamily, inner membrane component |
| P73_2383 | NADH-quinone oxidoreductase subunits H/I                                              |
| P73_2384 | glucose-inhibited division protein A                                                  |
| P73_2392 | ketosteroid isomerase-like protein                                                    |
| P73_2394 | Predicted esterase of the alpha/beta hydrolase fold                                   |
| P73_2396 | AraC family transcriptional regulator                                                 |
| P73_2397 | Predicted permeases                                                                   |
| P73_2398 | Predicted ATPase                                                                      |
| P73_2399 | outer membrane receptor FepA                                                          |
| P73_2400 | nitroreductase                                                                        |
| P73_2401 | phosphoribosyltransferase                                                             |
| P73_2403 | PEBP family protein                                                                   |
| P73_2406 | sulfonate/nitrate transport system substrate-binding protein                          |
| P73_2407 | Protein of unknown function (DUF3016)                                                 |
| P73_2408 | Transcriptional regulator                                                             |
| P73_2413 | periplasmic binding protein/LacI transcriptional regulator                            |
| P73_2414 | FMN-dependent oxidoreductase, nitrilotriacetate monooxygenase family                  |

|          |                                                                                           |              |
|----------|-------------------------------------------------------------------------------------------|--------------|
| P73_2416 | ferric vibriobactin receptor                                                              |              |
| P73_2418 | MarR family transcriptional regulator                                                     |              |
| P73_2419 | GntR family transcriptional regulator                                                     |              |
| P73_2422 | hypothetical protein                                                                      |              |
| P73_2424 | hypothetical protein                                                                      |              |
| P73_2426 | gluconate 2-dehydrogenase (acceptor)                                                      |              |
| P73_2427 | Gluconate 2-dehydrogenase subunit 3                                                       |              |
| P73_2434 | integrase catalytic region                                                                |              |
| P73_2435 | transposase IS3/IS911 family protein                                                      |              |
| P73_2436 | IS66 Orf2 family protein                                                                  |              |
| P73_2437 | transposase IS66                                                                          |              |
| P73_2438 | transposase                                                                               |              |
| P73_2439 | UDP-N-acetylmuramyl<br>phosphotransferase/UDP-N-acetylglucosamine-1-phosphate transferase | pentapeptide |
| P73_2440 | Transcription antiterminator                                                              |              |
| P73_2441 | group 1 glycosyl transferase                                                              |              |
| P73_2442 | group 1 glycosyl transferase                                                              |              |
| P73_2443 | O-antigen ligase like membrane protein                                                    |              |
| P73_2444 | glycosyl transferase family protein                                                       |              |
| P73_2445 | hypothetical protein                                                                      |              |
| P73_2446 | Sulfotransferase family                                                                   |              |
| P73_2447 | polysaccharide biosynthesis protein                                                       |              |
| P73_2448 | MarR family transcriptional regulator                                                     |              |
| P73_2449 | transposase, mutator type                                                                 |              |
| P73_2450 | transposase                                                                               |              |
| P73_2453 | phage-related integrase                                                                   |              |
| P73_2454 | RelE/StbE family addiction module toxin                                                   |              |
| P73_2455 | hypothetical protein                                                                      |              |
| P73_2456 | prophage CP4-57 regulatory                                                                |              |
| P73_2457 | hypothetical protein                                                                      |              |
| P73_2458 | hypothetical protein                                                                      |              |
| P73_2459 | hypothetical protein                                                                      |              |
| P73_2460 | hypothetical protein                                                                      |              |
| P73_2461 | hypothetical protein                                                                      |              |
| P73_2462 | hypothetical protein                                                                      |              |
| P73_2463 | HK97 family phage portal protein                                                          |              |
| P73_2464 | hypothetical protein                                                                      |              |
| P73_2465 | HK97 family phage major capsid protein                                                    |              |
| P73_2466 | hypothetical protein                                                                      |              |
| P73_2467 | HNH endonuclease                                                                          |              |
| P73_2468 | hypothetical protein                                                                      |              |
| P73_2469 | phage protein                                                                             |              |
| P73_2470 | Phage protein, HK97, gp10                                                                 |              |

|          |                                                    |
|----------|----------------------------------------------------|
| P73_2471 | Protein of unknown function (DUF3168)              |
| P73_2472 | phage head-tail adaptor                            |
| P73_2473 | P27 family phage terminase small subunit           |
| P73_2474 | Phage terminase-like protein                       |
| P73_2475 | Phage-related minor tail protein                   |
| P73_2476 | hypothetical protein                               |
| P73_2477 | hypothetical protein                               |
| P73_2480 | Crp/FNR family transcriptional regulator           |
| P73_2481 | signal transduction histidine kinase               |
| P73_2486 | Predicted peroxiredoxins                           |
| P73_2491 | Uncharacterized protein conserved in bacteria      |
| P73_2497 | beta-lactamase                                     |
| P73_2508 | hypothetical protein                               |
| P73_2510 | Predicted phosphohydrolases                        |
| P73_2511 | hypothetical protein                               |
| P73_2512 | Protein required for attachment to host cells      |
| P73_2528 | hypothetical protein                               |
| P73_2572 | soluble aldose sugar dehydrogenase YliI            |
| P73_2581 | Polyketide cyclase / dehydrase and lipid transport |
| P73_2583 | short chain oxidoreductase                         |
| P73_2584 | Protein of unknown function (DUF2934)              |
| P73_2585 | Protein of unknown function (DUF1451)              |
| P73_2586 | hypothetical protein                               |
| P73_2587 | hypothetical protein                               |
| P73_2591 | hypothetical protein                               |
| P73_2595 | hypothetical protein                               |
| P73_2596 | LysR family transcriptional regulator              |
| P73_2609 | hypothetical protein                               |
| P73_2608 | Uncharacterized protein conserved in bacteria      |
| P73_2624 | hypothetical protein                               |
| P73_2634 | heat shock protein HtpX                            |
| P73_2649 | hypothetical protein                               |
| P73_2650 | Uncharacterized homolog of Blt101                  |
| P73_2652 | hypothetical protein                               |
| P73_2698 | CBS-domain-containing membrane protein             |
| P73_2701 | alkylphosphonate utilization protein PhnA          |
| P73_2703 | integrase family protein                           |
| P73_2704 | SPW repeat                                         |
| P73_2705 | DNA-directed RNA polymerase, omega subunit         |
| P73_2706 | ETC complex I subunit region                       |
| P73_2708 | hypothetical protein                               |
| P73_2709 | amylo-alpha-1,6-glucosidase                        |
| P73_2710 | group 1 glycosyl transferase                       |

|          |                                                                  |
|----------|------------------------------------------------------------------|
| P73_2711 | sodium/hydrogen exchanger                                        |
| P73_2715 | protease HtpX family protein                                     |
| P73_2716 | Heat shock protein Hsp20                                         |
| P73_2717 | heat shock protein Hsp20                                         |
| P73_2733 | small heat-shock protein molecular chaperone                     |
| P73_2734 | heat shock protein Hsp20                                         |
| P73_2737 | Uncharacterized conserved protein                                |
| P73_2739 | YfdX protein                                                     |
| P73_2742 | heat shock protein HtpX                                          |
| P73_2743 | TrkA-C domain protein                                            |
| P73_2759 | hypothetical protein                                             |
| P73_2763 | Fic family protein                                               |
| P73_2767 | hypothetical protein                                             |
| P73_2768 | hypothetical protein                                             |
| P73_2770 | hypothetical protein                                             |
| P73_2771 | putative ATPase                                                  |
| P73_2772 | peptidase S8 family protein                                      |
| P73_2773 | Protein of unknown function (DUF982)                             |
| P73_2775 | putative cysteine protease, Transglutaminase-like domain protein |
| P73_2777 | hypothetical protein                                             |
| P73_2778 | hypothetical protein                                             |
| P73_2786 | Pyocin activator protein PrtN                                    |
| P73_2787 | Domain of unknown function (DUF4095)                             |
| P73_2788 | hypothetical protein                                             |
| P73_2790 | hypothetical protein                                             |
| P73_2791 | hypothetical protein                                             |
| P73_2794 | fatty acid desaturase                                            |
| P73_2795 | hypothetical protein                                             |
| P73_2799 | CRP family transcriptional regulator                             |
| P73_2800 | hypothetical protein                                             |
| P73_2801 | fatty acid desaturase                                            |
| P73_2802 | hypothetical protein                                             |
| P73_2804 | hypothetical protein                                             |
| P73_2805 | hypothetical protein                                             |
| P73_2806 | hypothetical protein                                             |
| P73_2807 | hypothetical protein                                             |
| P73_2808 | hypothetical protein                                             |
| P73_2817 | LysR family transcriptional regulator                            |
| P73_2819 | mandelate racemase/muconate lactonizing protein                  |
| P73_2822 | putative sarcosine oxidase subunit alpha                         |
| P73_2825 | BioY protein                                                     |
| P73_2826 | biotin synthase                                                  |
| P73_2828 | pyridoxal kinase                                                 |



|          |                                                                      |
|----------|----------------------------------------------------------------------|
| P73_2830 | transcriptional regulator                                            |
| P73_2831 | exported protein (TRAP-type transport system, periplasmic component) |
| P73_2832 | TRAP C4-dicarboxylate transport system subunit DctQ                  |
| P73_2834 | arylmalonate decarboxylase                                           |
| P73_2835 | Domain of unknown function (DUF4392)                                 |
| P73_2836 | C4-dicarboxylate-binding periplasmic protein                         |
| P73_2837 | putative DctQ (C4-dicarboxylate permease, small subunit)             |
| P73_2839 | decarboxylase                                                        |
| P73_2840 | hydantoinase B                                                       |
| P73_2848 | choline/ethanolamine kinase                                          |
| P73_2849 | aminoglycoside phosphotransferase                                    |
| P73_2850 | allantoate amidohydrolase                                            |
| P73_2854 | extracellular solute-binding protein                                 |
| P73_2858 | acetone carboxylase subunit gamma                                    |
| P73_2860 | acetone carboxylase subunit beta                                     |
| P73_2864 | short-chain dehydrogenase/reductase sDR                              |
| P73_2865 | short-chain dehydrogenase                                            |
| P73_2866 | dihydrodipicolinate synthetase                                       |
| P73_2867 | permease                                                             |
| P73_2869 | putative amidohydrolase                                              |
| P73_2870 | putative ABC transporter substrate binding protein                   |
| P73_2873 | binding-protein-dependent transporters inner membrane component      |
| P73_2875 | Rieske (2Fe-2S) domain-containing protein                            |
| P73_2876 | putative amidohydrolase                                              |
| P73_2879 | endoribonuclease L-PSP                                               |
| P73_2884 | Class I triheme cytochrome c                                         |
| P73_2885 | Uncharacterized protein conserved in bacteria                        |
| P73_2917 | diacylglycerol kinase catalytic subunit                              |
| P73_2918 | metallophosphoesterase                                               |
| P73_2946 | Predicted Zn-dependent protease (DUF2268)                            |
| P73_2958 | amidohydrolase 2                                                     |
| P73_2959 | hypothetical protein                                                 |
| P73_2960 | Rieske (2Fe-2S) iron-sulfur domain-containing protein                |
| P73_2961 | putative Transcriptional regulator, MarR family protein              |
| P73_2962 | EamA-like transporter family                                         |
| P73_2963 | hypothetical protein                                                 |
| P73_2964 | 4,5-dihydroxyphthalate decarboxylase                                 |
| P73_2965 | oxidoreductase domain-containing protein                             |
| P73_2970 | hypothetical protein                                                 |
| P73_2972 | acetolactate synthase II                                             |
| P73_2973 | arylmalonate decarboxylase                                           |
| P73_2974 | TRAP-type C4-dicarboxylate transport system, periplasmic component   |
| P73_2976 | TRAP-T family transporter, DctQ (4 TMs) subunit                      |

|          |                                                                   |
|----------|-------------------------------------------------------------------|
| P73_2977 | hydantoinase B                                                    |
| P73_2978 | N-methylhydantoinase A/acetone carboxylase, beta subunit          |
| P73_2981 | IclR family transcriptional regulator                             |
| P73_2985 | MarR family transcriptional regulator                             |
| P73_2986 | putative periplasmic binding protein                              |
| P73_2988 | streptomycin 3"-adenylyltransferase                               |
| P73_2994 | hypothetical protein                                              |
| P73_3004 | PA-phosphatase-like phosphoesterase                               |
| P73_3019 | PRC-barrel domain                                                 |
| P73_3024 | glyoxalase/bleomycin resistance protein/dioxygenase               |
| P73_3042 | bacterioferritin                                                  |
| P73_3043 | bacterioferritin-associated ferredoxin                            |
| P73_3058 | hypothetical protein                                              |
| P73_3070 | hypothetical protein                                              |
| P73_3071 | polysaccharide biosynthesis protein                               |
| P73_3072 | putative glycosyltransferase                                      |
| P73_3073 | Glycosyltransferase                                               |
| P73_3074 | succinoglycan biosynthesis protein ExoM                           |
| P73_3076 | putative licheninase                                              |
| P73_3077 | succinoglycan biosynthesis protein ExoO                           |
| P73_3078 | putative exopolysaccharide production protein                     |
| P73_3079 | family 2 glycosyl transferase                                     |
| P73_3080 | succinoglycan biosynthesis protein ExoA                           |
| P73_3081 | putative glycosyl transferase                                     |
| P73_3082 | oxidoreductase domain-containing protein                          |
| P73_3083 | O-antigen polymerase                                              |
| P73_3084 | succinoglycan biosynthesis transport protein exoP                 |
| P73_3085 | glucose sorbosone dehydrogenase                                   |
| P73_3099 | allophanate hydrolase subunit 1                                   |
| P73_3100 | D-isomer specific 2-hydroxyacid dehydrogenase NAD-binding protein |
| P73_3105 | family 5 extracellular solute-binding protein                     |
| P73_3106 | Uncharacterized protein conserved in bacteria                     |
| P73_3110 | LacI family transcriptional regulator                             |
| P73_3112 | Uncharacterized protein conserved in bacteria                     |
| P73_3113 | hypothetical protein                                              |
| P73_3114 | glycerophosphoryl diester phosphodiesterase                       |
| P73_3119 | twin-arginine translocation pathway signal                        |
| P73_3122 | RpiR family transcriptional regulator                             |
| P73_3123 | LacI family transcriptional regulator                             |
| P73_3124 | extracellular solute-binding protein                              |
| P73_3126 | spermidine/putrescine ABC transporter permease                    |
| P73_3130 | flavin reductase domain-containing protein                        |
| P73_3131 | catalase                                                          |

|          |                                                                                |
|----------|--------------------------------------------------------------------------------|
| P73_3134 | ABC transporter substrate-binding protein                                      |
| P73_3139 | SnoaL-like domain                                                              |
| P73_3140 | cyclododecanone monooxygenase                                                  |
| P73_3141 | sodium/bile acid symporter family (MazG-like protein)                          |
| P73_3142 | polysaccharide deacetylase                                                     |
| P73_3143 | polysaccharide deacetylase family protein                                      |
| P73_3145 | Transcriptional regulator                                                      |
| P73_3146 | ABC transporter substrate binding protein                                      |
| P73_3148 | binding-protein-dependent transporter inner membrane component                 |
| P73_3149 | Predicted flavoprotein involved in K <sup>+</sup> transport                    |
| P73_3150 | ring-opening amidohydrolase                                                    |
| P73_3151 | peptidylglycine alpha-amidating monooxygenase                                  |
| P73_3152 | Uncharacterized conserved protein                                              |
| P73_3167 | Protein of unknown function (DUF3008)                                          |
| P73_3170 | transcriptional regulator                                                      |
| P73_3171 | hypothetical protein                                                           |
| P73_3179 | lytic transglycosylase                                                         |
| P73_3181 | (3S)-methyl-CoA thioesterase                                                   |
| P73_3208 | DNA topoisomerase                                                              |
| P73_3219 | transposase                                                                    |
| P73_3220 | transposase                                                                    |
| P73_3237 | hypothetical protein                                                           |
| P73_3238 | hypothetical protein                                                           |
| P73_3239 | hypothetical protein                                                           |
| P73_3240 | phage/plasmid primase, P4 family, C-terminal domain                            |
| P73_3241 | hypothetical protein                                                           |
| P73_3242 | Helix-turn-helix domain                                                        |
| P73_3243 | hypothetical protein                                                           |
| P73_3244 | integrase family protein                                                       |
| P73_3245 | resolvase-like protein                                                         |
| P73_3246 | hypothetical protein                                                           |
| P73_3247 | hypothetical protein                                                           |
| P73_3248 | hypothetical protein                                                           |
| P73_3249 | hypothetical protein                                                           |
| P73_3250 | TraG/TraD family protein                                                       |
| P73_3251 | Uncharacterized protein containing a von Willebrand factor type A (vWA) domain |
| P73_3252 | hypothetical protein                                                           |
| P73_3253 | hypothetical protein                                                           |
| P73_3255 | histone-like nucleoid-structuring protein H-NS                                 |
| P73_3256 | hypothetical protein                                                           |
| P73_3257 | DNA methyltransferase                                                          |
| P73_3258 | restriction enzyme                                                             |
| P73_3259 | McrBC 5-methylcytosine restriction system component                            |

|          |                                                                                          |
|----------|------------------------------------------------------------------------------------------|
| P73_3261 | hypothetical protein                                                                     |
| P73_3262 | Filamentation induced by cAMP protein Fic                                                |
| P73_3263 | hypothetical protein                                                                     |
| P73_3264 | hypothetical protein                                                                     |
| P73_3265 | hypothetical protein                                                                     |
| P73_3266 | hypothetical protein                                                                     |
| P73_3267 | phosphoglycerate kinase                                                                  |
| P73_3268 | hypothetical protein                                                                     |
| P73_3269 | hypothetical protein                                                                     |
| P73_3270 | relaxase/mobilization nuclease domain-containing protein                                 |
| P73_3271 | hypothetical protein                                                                     |
| P73_3272 | dienelactone hydrolase family protein                                                    |
| P73_3286 | N-acetyltransferase GCN5                                                                 |
| P73_3287 | transcriptional regulator, TraR/DksA family                                              |
| P73_3328 | cytochrome o ubiquinol oxidase subunit II                                                |
| P73_3330 | cytochrome o ubiquinol oxidase subunit III (Ubiquinol oxidase chain C)                   |
| P73_3331 | cytochrome C oxidase subunit IV                                                          |
| P73_3332 | putative SURF1 family protein                                                            |
| P73_3339 | transcriptional regulator                                                                |
| P73_3340 | peptidase T                                                                              |
| P73_3351 | exsB protein                                                                             |
| P73_3354 | Putative homoserine kinase type II (protein kinase fold)                                 |
| P73_3370 | hypothetical protein                                                                     |
| P73_3380 | Predicted periplasmic or secreted lipoprotein                                            |
| P73_3381 | Uncharacterized conserved protein                                                        |
| P73_3422 | exopolysaccharide synthesis, exoD                                                        |
| P73_3423 | hypothetical protein                                                                     |
| P73_3462 | Adenylate kinase and related kinases                                                     |
| P73_3472 | hypothetical protein                                                                     |
| P73_3490 | MgtC/SapB transporter                                                                    |
| P73_3502 | Uncharacterized protein conserved in bacteria (DUF2065)                                  |
| P73_3512 | DNA-O6-methylguanine--protein-cysteine S-methyltransferase/transcriptional regulator Ada |
| P73_3539 | hypothetical protein                                                                     |
| P73_3547 | bleMBL                                                                                   |
| P73_3554 | Uncharacterized protein conserved in bacteria, putative lipoprotein                      |
| P73_3555 | EamA-like transporter family                                                             |
| P73_3556 | AAA domain                                                                               |
| P73_3558 | hypothetical protein                                                                     |
| P73_3560 | hypothetical protein                                                                     |
| P73_3561 | Molecular chaperone, HSP90 family                                                        |
| P73_3562 | endonuclease                                                                             |
| P73_3563 | Domain of unknown function (DUF4420)                                                     |

|          |                                                                                    |
|----------|------------------------------------------------------------------------------------|
| P73_3564 | AIPR protein                                                                       |
| P73_3565 | DNA-cytosine methyltransferase                                                     |
| P73_3566 | DNA mismatch endonuclease Vsr                                                      |
| P73_3567 | TniQ                                                                               |
| P73_3570 | MscS mechanosensitive ion channel                                                  |
| P73_3574 | CHAD domain-containing protein                                                     |
| P73_3581 | putative restriction endonuclease                                                  |
| P73_3582 | hypothetical protein                                                               |
| P73_3584 | hypothetical protein                                                               |
| P73_3585 | hypothetical protein                                                               |
| P73_3587 | type 12 methyltransferase                                                          |
| P73_3606 | Hemerythrin HHE cation binding domain                                              |
| P73_3624 | hypothetical protein                                                               |
| P73_3634 | putative divalent heavy-metal cations transporter                                  |
| P73_3635 | hypothetical protein                                                               |
| P73_3662 | extracellular nuclease                                                             |
| P73_3665 | ybaK/ebcC protein                                                                  |
| P73_3673 | Hpt domain                                                                         |
| P73_3676 | Invasion associated locus B family protein                                         |
| P73_3677 | serine protease/outer membrane autotransporter                                     |
| P73_3678 | Ku protein, prokaryotic                                                            |
| P73_3679 | DNA polymerase LigD polymerase domain-containing protein                           |
| P73_3680 | Predicted membrane protein                                                         |
| P73_3683 | diacylglycerol kinase                                                              |
| P73_3684 | hypothetical protein                                                               |
| P73_3688 | TonB-dependent receptor                                                            |
| P73_3691 | Transposase DDE domain group 1                                                     |
| P73_3706 | Na/Pi-cotransporter II-like protein                                                |
| P73_3708 | hemolysin-type calcium-binding region                                              |
| P73_3709 | 2,3-dimethylmalate lyase                                                           |
| P73_3710 | PrpF family protein                                                                |
| P73_3711 | GntR family transcriptional regulator                                              |
| P73_3712 | Uncharacterized protein conserved in bacteria                                      |
| P73_3713 | Tripartite tricarboxylate transporter TctB family                                  |
| P73_3717 | 4-oxalomesaconate hydratase                                                        |
| P73_3718 | TRAP transporter solute receptor, TAXI family protein                              |
| P73_3720 | 2-polyprenyl-6-methoxyphenol hydroxylase and related FAD-dependent oxidoreductases |
| P73_3721 | IclR family transcriptional regulator                                              |
| P73_3722 | aldo/keto reductase                                                                |
| P73_3723 | transcriptional regulator                                                          |
| P73_3733 | carbamate kinase                                                                   |
| P73_3735 | arginine deiminase                                                                 |
| P73_3736 | arginine repressor                                                                 |

|          |                                                                  |
|----------|------------------------------------------------------------------|
| P73_3738 | TRAP transporter DctQ-like subunit                               |
| P73_3739 | 2,3-diketo-L-gulonate-binding periplasmic protein                |
| P73_3740 | hypothetical protein                                             |
| P73_3742 | thiamine pyrophosphate TPP-binding domain-containing protein     |
| P73_3744 | TRAP dicarboxylate transporter subunit DctQ                      |
| P73_3745 | TRAP dicarboxylate transporter subunit DctP                      |
| P73_3748 | Peptidase S15                                                    |
| P73_3749 | Major facilitator superfamily MFS_1                              |
| P73_3750 | Extracellular solute-binding protein, family 5 precursor         |
| P73_3755 | GntR family transcriptional regulator                            |
| P73_3756 | hypothetical protein                                             |
| P73_3757 | hypothetical protein                                             |
| P73_3758 | hypothetical protein                                             |
| P73_3761 | hypothetical protein                                             |
| P73_3762 | hypothetical protein                                             |
| P73_3763 | hypothetical protein                                             |
| P73_3764 | hypothetical protein                                             |
| P73_3765 | hypothetical protein                                             |
| P73_3766 | Thermostable 8-oxoguanine DNA glycosylase                        |
| P73_3767 | hypothetical protein                                             |
| P73_3768 | nucleoside 2-deoxyribosyltransferase family protein              |
| P73_3769 | Predicted PP-loop superfamily ATPase                             |
| P73_3770 | transposase, IS4 family protein                                  |
| P73_3771 | hypothetical protein                                             |
| P73_3772 | hypothetical protein                                             |
| P73_3774 | ABC transporter substrate binding protein (glycerol-3-phosphate) |
| P73_3775 | ABC transporter membrane spanning protein (glycerol-3-phosphate) |
| P73_3776 | ABC transporter membrane spanning protein (glycerol-3-phosphate) |
| P73_3777 | glycerophosphoryl diester phosphodiesterase                      |
| P73_3779 | RpiR family transcriptional regulator                            |
| P73_3780 | Uncharacterized protein conserved in bacteria                    |
| P73_3784 | ACR3 family arsenite efflux pump                                 |
| P73_3785 | arsenate reductase                                               |
| P73_3786 | arsenical resistance protein arsh                                |
| P73_3788 | major facilitator transporter                                    |
| P73_3789 | hypothetical protein                                             |
| P73_3790 | ArsR family transcriptional regulator                            |
| P73_3793 | putative transposase                                             |
| P73_3794 | transposase mutator type                                         |
| P73_3816 | protein YjbJ                                                     |
| P73_3854 | acylphosphatase                                                  |
| P73_3856 | hypothetical protein                                             |
| P73_3859 | Inner membrane protein involved in colicin E2 resistance         |

|          |                                                                                                                                                 |
|----------|-------------------------------------------------------------------------------------------------------------------------------------------------|
| P73_3861 | exoV domain-containing protein                                                                                                                  |
| P73_3876 | hypothetical protein                                                                                                                            |
| P73_3885 | ABC transporter                                                                                                                                 |
| P73_3887 | nitrate/sulfonate/bicarbonate ABC transporter permease                                                                                          |
| P73_3888 | ABC-type nitrate/sulfonate/bicarbonate transport system, substrate binding protein                                                              |
| P73_3917 | GntR family transcriptional regulator                                                                                                           |
| P73_3918 | ABC-type Fe <sup>3+</sup> transport system permease component                                                                                   |
| P73_3919 | Acyl-CoA dehydrogenase, C-terminal:Acyl-CoA dehydrogenase, central region:Acyl-CoA dehydrogenase, N-terminal:Acyl-CoA dehydrogenase, N-terminal |
| P73_3920 | transposase, orfB                                                                                                                               |
| P73_3921 | transposase IS3/IS911 family protein                                                                                                            |
| P73_3922 | TonB-dependent outermembrane ferripyoverdine receptor FpvA                                                                                      |
| P73_3923 | putative transmembrane sensor protein                                                                                                           |
| P73_3924 | ECF subfamily RNA polymerase sigma-24 factor                                                                                                    |
| P73_3928 | hypothetical protein                                                                                                                            |
| P73_3929 | hypothetical protein                                                                                                                            |
| P73_3930 | curli production assembly/transport component CsgG                                                                                              |
| P73_3932 | major facilitator superfamily transporter                                                                                                       |
| P73_3935 | Transcriptional regulator, XRE family protein                                                                                                   |
| P73_3936 | TRAP dicarboxylate transporter subunit DctP                                                                                                     |
| P73_3937 | tripartite ATP-independent periplasmic transporter subunit DctQ                                                                                 |
| P73_3939 | oxidoreductase FAD-binding subunit                                                                                                              |
| P73_3940 | dihydroorotate dehydrogenase family protein                                                                                                     |
| P73_3941 | amidase                                                                                                                                         |
| P73_3943 | hypothetical protein                                                                                                                            |
| P73_3944 | RpiR family transcriptional regulator                                                                                                           |
| P73_3946 | nitrate/sulfonate/bicarbonate ABC transporter periplasmic protein                                                                               |
| P73_3948 | binding-protein-dependent transport system inner membrane protein                                                                               |
| P73_3949 | ABC transporter, membrane spanning protein                                                                                                      |
| P73_3950 | extracellular solute-binding protein                                                                                                            |
| P73_3951 | peptidase M24                                                                                                                                   |
| P73_3952 | phosphoenolpyruvate carboxylase                                                                                                                 |
| P73_3956 | nitrate/nitrite regulatory protein                                                                                                              |
| P73_3962 | TetR family transcriptional regulator                                                                                                           |
| P73_3963 | tetrahydromethanopterin S-methyltransferase subunit H                                                                                           |
| P73_3964 | methyltransferase CmuC                                                                                                                          |
| P73_3966 | regulatory protein FmdB                                                                                                                         |
| P73_3967 | electron transfer protein PaaE                                                                                                                  |
| P73_3968 | imidazolonepropionase                                                                                                                           |
| P73_3969 | 5,10-methylenetetrahydrofolate reductase                                                                                                        |
| P73_3970 | hypothetical protein                                                                                                                            |
| P73_3971 | major facilitator family protein                                                                                                                |
| P73_3972 | transposase                                                                                                                                     |

|          |                                                                      |
|----------|----------------------------------------------------------------------|
| P73_3973 | transposase                                                          |
| P73_3975 | transcriptional regulator                                            |
| P73_3976 | 4'-phosphopantetheinyl transferase                                   |
| P73_3977 | extracytoplasmic-function sigma-70 factor                            |
| P73_3978 | L-ornithine 5-monooxygenase                                          |
| P73_3979 | putative siderophore biosynthesis protein                            |
| P73_3980 | esterase                                                             |
| P73_3982 | efflux transporter inner membrane protein                            |
| P73_3983 | mbtH-like protein                                                    |
| P73_3984 | amino acid adenylation domain-containing protein                     |
| P73_3986 | transport system permease                                            |
| P73_3988 | periplasmic binding protein                                          |
| P73_3989 | ferrichrome receptor precursor protein                               |
| P73_3990 | HipA-like C-terminal domain/HipA-like N-terminal domain              |
| P73_3991 | Transposase and inactivated derivatives                              |
| P73_3992 | HipA-like protein                                                    |
| P73_3993 | short-chain alcohol dehydrogenase-like protein                       |
| P73_3994 | tagatose-6-phosphate ketose/aldose isomerase                         |
| P73_3996 | N-acetylglucosamine-6-phosphate deacetylase                          |
| P73_3997 | N-acetyl-D-glucosamine kinase                                        |
| P73_3998 | transcriptional repressor of aga operon                              |
| P73_4000 | hypothetical protein                                                 |
| P73_3999 | binding-protein-dependent transport systems inner membrane component |
| P73_4001 | maltose ABC transporter transmembrane protein                        |
| P73_4002 | extracellular solute-binding protein family 1                        |
| P73_4004 | Domain of unknown function (DUF4091)                                 |
| P73_4005 | Predicted membrane protein (DUF2207)                                 |
| P73_4006 | tripartite ATP-independent periplasmic transporter DctQ component    |
| P73_4007 | TRAP dicarboxylate transporter subunit DctP                          |
| P73_4009 | FAD dependent oxidoreductase                                         |
| P73_4010 | LysR family transcriptional regulator                                |
| P73_4011 | LysR family transcriptional regulator                                |
| P73_4012 | dibenzothiophene desulfurization enzyme                              |
| P73_4013 | 3-mercaptopyruvate sulfurtransferase                                 |
| P73_4015 | haloacid dehalogenase domain-containing protein hydrolase            |
| P73_4016 | endoribonuclease L-PSP                                               |
| P73_4017 | hydroxyethylthiazole kinase                                          |
| P73_4018 | LysR family transcriptional regulator                                |
| P73_4019 | LysR family transcriptional regulator                                |
| P73_4020 | Hydrolases of the alpha/beta superfamily                             |
| P73_4021 | NADH(P)-binding                                                      |
| P73_4022 | riboflavin synthase subunit beta                                     |
| P73_4023 | GntR family transcriptional regulator                                |



|          |                                                                                           |              |
|----------|-------------------------------------------------------------------------------------------|--------------|
| P73_4024 | Demethylmenaquinone methyltransferase                                                     |              |
| P73_4026 | binding-protein-dependent transport systems inner membrane component                      |              |
| P73_4028 | extracellular solute-binding protein family 1 protein                                     |              |
| P73_4029 | ribose-5-phosphate isomerase B                                                            |              |
| P73_4030 | LysR family transcriptional regulator                                                     |              |
| P73_4034 | ABC transporter substrate binding protein                                                 |              |
| P73_4035 | oligopeptide ABC transporter substrate binding protein                                    |              |
| P73_4036 | aliphatic sulfonates family ABC transporter periplasmic ligand-binding protein            |              |
| P73_4037 | acyl-CoA dehydrogenase                                                                    |              |
| P73_4038 | monooxygenase                                                                             |              |
| P73_4039 | NAD-dependent epimerase/dehydratase                                                       |              |
| P73_4040 | Gamma-glutamyltranspeptidase protein                                                      |              |
| P73_4041 | ABC transporter substrate binding protein                                                 |              |
| P73_4043 | alkanesulfonate monooxygenase                                                             |              |
| P73_4044 | ABC transporter                                                                           |              |
| P73_4045 | nodulation protein nolR                                                                   |              |
| P73_4046 | thiamine pyrophosphate protein TPP binding domain-containing protein                      |              |
| P73_4047 | Predicted membrane protein                                                                |              |
| P73_4048 | GntR family transcriptional regulator                                                     |              |
| P73_4049 | family 5 extracellular solute-binding protein                                             |              |
| P73_4053 | NAD-dependent epimerase/dehydratase                                                       |              |
| P73_4054 | short-chain dehydrogenase/reductase SDR                                                   |              |
| P73_4056 | acetyltransferase                                                                         |              |
| P73_4057 | Protein-tyrosine-phosphatase                                                              |              |
| P73_4058 | Periplasmic protein involved in polysaccharide export                                     |              |
| P73_4059 | UDP-N-acetylmuramyl<br>phosphotransferase/UDP-N-acetylglucosamine-1-phosphate transferase | pentapeptide |
| P73_4060 | Transcription antiterminator                                                              |              |
| P73_4063 | hypothetical protein                                                                      |              |
| P73_4064 | MarR family transcriptional regulator                                                     |              |
| P73_4065 | polysaccharide biosynthesis protein                                                       |              |
| P73_4066 | transposase IS3/IS911 family protein                                                      |              |
| P73_4067 | transposase, orfB                                                                         |              |
| P73_4073 | taurine catabolism dioxygenase TauD/TfdA                                                  |              |
| P73_4077 | sulfonate/nitrate transporter                                                             |              |
| P73_4078 | putative transposase                                                                      |              |
| P73_4079 | transposase                                                                               |              |
| P73_4080 | transposase                                                                               |              |
| P73_4081 | binding-protein-dependent transport system inner membrane protein                         |              |
| P73_4083 | ABC transporter substrate-binding protein                                                 |              |
| P73_4084 | FMNH <sub>2</sub> -dependent monooxygenase                                                |              |
| P73_4085 | FMN-dependent oxidoreductase, nitrilotriacetate monooxygenase                             |              |
| P73_4086 | putative acyl-CoA dehydrogenase                                                           |              |

|          |                                                                 |
|----------|-----------------------------------------------------------------|
| P73_4087 | putative oxidoreductase                                         |
| P73_4088 | TetR family transcriptional regulator                           |
| P73_4089 | asparaginase                                                    |
| P73_4090 | putative cystine-binding periplasmic protein                    |
| P73_4091 | ABC transporter substrate binding protein                       |
| P73_4093 | acetyltransferase                                               |
| P73_4095 | flavin-dependent oxidoreductase                                 |
| P73_4096 | luciferase-like monooxygenase superfamily protein               |
| P73_4097 | outer membrane receptor for ferrienterochelin and colicins      |
| P73_4098 | pyridoxamine 5'-phosphate oxidase                               |
| P73_4100 | transcriptional regulator                                       |
| P73_4101 | hypothetical protein                                            |
| P73_4104 | TRAP-type transport system, small permease                      |
| P73_4106 | Amidohydrolase                                                  |
| P73_4109 | Tripartite tricarboxylate transporter TctB family               |
| P73_4111 | Uncharacterized protein conserved in bacteria                   |
| P73_4112 | PRC-barrel domain                                               |
| P73_4113 | Blr3415 protein                                                 |
| P73_4114 | nitrilotriacetate monooxygenase                                 |
| P73_4117 | NMT1/THI5 like domain-containing protein                        |
| P73_4129 | hypothetical protein                                            |
| P73_4135 | hypothetical protein                                            |
| P73_4136 | hypothetical protein                                            |
| P73_4142 | UDP-N-acetylmuramoyl-tripeptide--D-alanyl-D- alanine ligase     |
| P73_4143 | hypothetical protein                                            |
| P73_4149 | ferric enterobactin-binding periplasmic protein FepB            |
| P73_4150 | TonB-dependent siderophore receptor                             |
| P73_4151 | ATP dependent DNA ligase                                        |
| P73_4152 | putative exonuclease, DNA ligase-associated                     |
| P73_4153 | two-component system, chemotaxis family,response regulator CheB |
| P73_4154 | Crp/Fnr-family transcriptional regulator                        |
| P73_4156 | oxidoreductase subunit                                          |
| P73_4157 | xanthine dehydrogenase YagR molybdenum-binding subunit          |
| P73_4158 | short-chain dehydrogenase/reductase SDR                         |
| P73_4159 | hypothetical protein                                            |
| P73_4165 | extracellular solute-binding protein                            |
| P73_4193 | hypothetical protein                                            |
| P73_4271 | hypothetical protein                                            |
| P73_4291 | Predicted ester cyclase                                         |
| P73_4313 | hypothetical protein                                            |
| P73_4314 | glycosyl transferase family protein                             |
| P73_4315 | UDP-N-acetylenolpyruvoylglucosamine reductase                   |
| P73_4316 | putative transcriptional regulator                              |

|          |                                                                      |
|----------|----------------------------------------------------------------------|
| P73_4319 | resorcinol 4-hydroxylase reductase subunit                           |
| P73_4320 | DoxX family protein                                                  |
| P73_4324 | phosphoketolase                                                      |
| P73_4326 | hypothetical protein                                                 |
| P73_4328 | hypothetical protein                                                 |
| P73_4329 | hypothetical protein                                                 |
| P73_4330 | superoxide dismutase, copper/zinc binding protein                    |
| P73_4331 | hypothetical protein                                                 |
| P73_4332 | hypothetical protein                                                 |
| P73_4334 | transport-associated protein                                         |
| P73_4335 | Uncharacterized protein conserved in bacteria                        |
| P73_4336 | Protein of unknown function (DUF3008)                                |
| P73_4337 | broad-specificity glycerol dehydrogenase, subunit SldA               |
| P73_4338 | exopolysaccharide synthesis, ExoD                                    |
| P73_4339 | cytochrome c, class I                                                |
| P73_4340 | Cytochrome c oxidase caa3-type, assembly factor CtaG-related protein |
| P73_4341 | hypothetical protein                                                 |
| P73_4343 | cytochrome c, monoheme                                               |
| P73_4344 | fatty acid alpha hydroxylase                                         |
| P73_4345 | methyltransferase                                                    |
| P73_4346 | NAD-dependent epimerase/dehydratase                                  |
| P73_4347 | Uncharacterized protein conserved in bacteria                        |
| P73_4348 | Uncharacterized protein conserved in bacteria                        |
| P73_4349 | Uncharacterized protein conserved in bacteria                        |
| P73_4350 | group 1 glycosyl transferase                                         |
| P73_4351 | nucleoside diphosphate epimerase                                     |
| P73_4352 | nucleoside-diphosphate-sugar epimerase                               |
| P73_4353 | threonine dehydrogenase                                              |
| P73_4354 | ECF subfamily RNA polymerase sigma-24 factor                         |
| P73_4355 | hypothetical protein                                                 |
| P73_4356 | Predicted periplasmic or secreted lipoprotein                        |
| P73_4357 | hypothetical protein                                                 |
| P73_4358 | hypothetical protein                                                 |
| P73_4359 | hypothetical protein                                                 |
| P73_4362 | ribonuclease BN                                                      |
| P73_4363 | Protein of unknown function (DUF3618)                                |
| P73_4364 | Protein of unknown function (DUF1469)                                |
| P73_4365 | hypothetical protein                                                 |
| P73_4366 | trehalose-phosphatase                                                |
| P73_4371 | Quinol oxidase subunit II QxtB                                       |
| P73_4372 | Oxidoreductase alpha (Molybdopterin) subunit                         |
| P73_4374 | cytochrome c oxidase subunit III                                     |
| P73_4375 | cytochrome C oxidase subunit IV                                      |

|          |                                                                                |
|----------|--------------------------------------------------------------------------------|
| P73_4377 | binding-protein-dependent transport system inner membrane protein              |
| P73_4378 | Binding-protein-dependent transport system inner membrane component            |
| P73_4379 | transposase, IS4 family protein                                                |
| P73_4381 | transposase IS116/IS110/IS902 family protein                                   |
| P73_4392 | replication initiation protein RepC                                            |
| P73_4393 | MarR family transcriptional regulator                                          |
| P73_4402 | tripartite ATP-independent periplasmic transporter DctQ                        |
| P73_4403 | TRAP-type C4-dicarboxylate transport system, periplasmic component             |
| P73_4407 | DNA-binding transcriptional activator MhpR                                     |
| P73_4409 | ABC transporter permease                                                       |
| P73_4410 | ABC transporter substrate-binding protein                                      |
| P73_4412 | hypothetical protein                                                           |
| P73_4424 | 6-phosphogluconate dehydrogenase                                               |
| P73_4426 | carboxymuconolactone decarboxylase                                             |
| P73_4428 | 3-hydroxyisobutyrate dehydrogenase                                             |
| P73_4429 | enoyl-CoA hydratase/isomerase                                                  |
| P73_4432 | Predicted metal-dependent hydrolase of the TIM-barrel fold                     |
| P73_4433 | binding-protein-dependent transport system inner membrane protein              |
| P73_4435 | nitrate/sulfonate/bicarbonate ABC transporter periplasmic protein-like protein |
| P73_4443 | amidohydrolase 2                                                               |
| P73_4444 | TRAP-type C4-dicarboxylate transport system, periplasmic component             |
| P73_4445 | Uncharacterized conserved protein                                              |
| P73_4446 | cupin                                                                          |
| P73_4454 | 1,4-dihydroxy-2-naphthoate synthase                                            |
| P73_4456 | TRAP-T family protein transporter, DctP (Periplasmic binding) subunit          |
| P73_4457 | carbon monoxide dehydrogenase medium subunit                                   |
| P73_4459 | carbon monoxide dehydrogenase subunit G (CoxG) family protein                  |
| P73_4461 | putative permease, DMT superfamily protein                                     |
| P73_4463 | acyl-CoA dehydrogenase yngJ                                                    |
| P73_4465 | 2-methylcitrate dehydratase                                                    |
| P73_4469 | TRAP-type C4-dicarboxylate transport system, small permease component          |
| P73_4470 | TRAP-T family protein transporter, DctP (Periplasmic binding) subunit          |
| P73_4472 | Zn-dependent hydrolases, including glyoxylases                                 |
| P73_4473 | carbon monoxide dehydrogenase                                                  |
| P73_4482 | 1,4-dihydroxy-2-naphthoate synthase                                            |
| P73_4484 | amidohydrolase 2                                                               |
| P73_4487 | dehydratase                                                                    |
| P73_4488 | enoyl-CoA hydratase                                                            |
| P73_4492 | putative alcohol dehydrogenase                                                 |
| P73_4494 | thioesterase-like protein                                                      |
| P73_4495 | Predicted thioesterase                                                         |
| P73_4497 | Predicted nucleic-acid-binding protein containing a Zn-ribbon                  |
| P73_4500 | Predicted metal-dependent hydrolase of the TIM-barrel fold                     |

|          |                                                                                             |
|----------|---------------------------------------------------------------------------------------------|
| P73_4501 | 4-oxalocrotonate tautomerase                                                                |
| P73_4502 | putative aldehyde dehydrogenase                                                             |
| P73_4503 | TRAP dicarboxylate transporter- DctP subunit                                                |
| P73_4512 | Uncharacterized conserved protein                                                           |
| P73_4513 | transposase, IS4 family protein                                                             |
| P73_4515 | transposase IS116/IS110/IS902 family protein                                                |
| P73_4516 | cupin                                                                                       |
| P73_4517 | transcriptional regulator                                                                   |
| P73_4518 | putative carboxymuconolactone decarboxylase                                                 |
| P73_4519 | oxidoreductase                                                                              |
| P73_4520 | cupin                                                                                       |
| P73_4522 | aldehyde oxidase and xanthine dehydrogenase molybdopterin binding protein                   |
| P73_4527 | replication initiation protein RepC                                                         |
| P73_4532 | oxidoreductase, flavocytochrome subunit                                                     |
| P73_4539 | hypothetical protein                                                                        |
| P73_4541 | hypothetical protein                                                                        |
| P73_4543 | hypothetical protein                                                                        |
| P73_4545 | parB-like partition protein                                                                 |
| P73_4546 | hypothetical protein                                                                        |
| P73_4547 | hypothetical protein                                                                        |
| P73_4548 | regulator PrIF                                                                              |
| P73_4549 | Toxin with endonuclease activity YhaV                                                       |
| P73_4550 | StaA                                                                                        |
| P73_4554 | hypothetical protein                                                                        |
| P73_4555 | ParB-like nuclease                                                                          |
| P73_4556 | hypothetical protein                                                                        |
| P73_4557 | Uncharacterized membrane protein (homolog of Drosophila rhomboid)                           |
| P73_4558 | Predicted transcriptional regulators                                                        |
| P73_4559 | Reverse transcriptase (RNA-dependent DNA polymerase)                                        |
| P73_4560 | TIR protein                                                                                 |
| P73_4562 | Micrococcal nuclease (thermonuclease) homologs                                              |
| P73_4563 | hypothetical protein                                                                        |
| P73_4564 | Helix-turn-helix domain                                                                     |
| P73_4567 | hypothetical protein                                                                        |
| P73_4568 | Prokaryotic homologs of the JAB domain                                                      |
| P73_4569 | Dinucleotide-utilizing enzymes involved in molybdopterin and thiamine biosynthesis family 2 |
| P73_4570 | hypothetical protein                                                                        |
| P73_4572 | hypothetical protein                                                                        |
| P73_4573 | Domain of unknown function (DUF4177)                                                        |
| P73_4580 | hypothetical protein                                                                        |
| P73_4587 | XRE family transcriptional regulator                                                        |
| P73_4588 | hypothetical protein                                                                        |

|          |                                                                             |
|----------|-----------------------------------------------------------------------------|
| P73_4605 | hypothetical protein                                                        |
| P73_4607 | putative inner membrane protein                                             |
| P73_4609 | Cytochrome c peroxidase                                                     |
| P73_4610 | phosphonate ABC transporter phosphate-binding periplasmic component         |
| P73_4617 | integrase, catalytic region (modular protein)                               |
| P73_4618 | transposase                                                                 |
| P73_4622 | hypothetical protein                                                        |
| P73_4623 | putative Zn peptidase                                                       |
| P73_4624 | Uncharacterized protein conserved in bacteria (DUF2188)                     |
| P73_4625 | hypothetical protein                                                        |
| P73_4649 | hypothetical protein                                                        |
| P73_4655 | hypothetical protein                                                        |
| P73_4656 | hypothetical protein                                                        |
| P73_4663 | excisionase                                                                 |
| P73_4666 | Predicted nucleic-acid-binding protein, contains PIN domain                 |
| P73_4667 | SpoVT/AbrB-like cell growth regulatory protein                              |
| P73_4676 | putative transposase for insertion sequence element                         |
| P73_4679 | hypothetical protein                                                        |
| P73_4680 | hypothetical protein                                                        |
| P73_4682 | transposase, mutator type                                                   |
| P73_4687 | putative transposase for insertion sequence element                         |
| P73_4693 | Protein of unknown function (DUF2384)                                       |
| P73_4694 | RES domain                                                                  |
| P73_4701 | hypothetical protein                                                        |
| P73_4700 | hypothetical protein                                                        |
| P73_4702 | putative type II DNA modification enzyme                                    |
| P73_4737 | hypothetical protein                                                        |
| P73_4749 | MarR family transcriptional regulator                                       |
| P73_4750 | salicylate esterase                                                         |
| P73_4751 | Predicted hydrolases or acyltransferases (alpha/beta hydrolase superfamily) |
| P73_4752 | transposase                                                                 |
| P73_4753 | transposase                                                                 |
| P73_4754 | integrase, catalytic region (modular protein)                               |
| P73_4755 | transposase                                                                 |
| P73_4759 | IS66 family insertion sequence transposase                                  |
| P73_4760 | IS66 Orf2 family protein                                                    |
| P73_4761 | integrase catalytic region                                                  |
| P73_4763 | cytochrome P450                                                             |
| P73_4764 | AraC family transcriptional regulator                                       |
| P73_4766 | TRAP dicarboxylate transporter subunit DctQ                                 |
| P73_4767 | TRAP transporter solute receptor                                            |
| P73_4768 | alcohol dehydrogenase                                                       |
| P73_4770 | IS5 family transposase OrfA                                                 |

|          |                                               |
|----------|-----------------------------------------------|
| P73_4772 | transposase IS116/IS110/IS902 family protein  |
| P73_4776 | hypothetical protein                          |
| P73_4777 | IS5 family transposase OrfA                   |
| P73_4779 | transposase IS116/IS110/IS902 family protein  |
| P73_4782 | hypothetical protein                          |
| P73_4783 | ISBmu7b transposase                           |
| P73_4784 | DNA replication protein                       |
| P73_4788 | hypothetical protein                          |
| P73_4790 | Membrane transport protein MerF               |
| P73_4792 | mercuric transporter MerT                     |
| P73_4796 | hypothetical protein                          |
| P73_4797 | plasmid replication initiator                 |
| P73_4799 | C-5 cytosine-specific DNA methylase           |
| P73_4800 | T/G mismatch-specific endonuclease            |
| P73_4801 | hypothetical protein                          |
| P73_4802 | hypothetical protein                          |
| P73_4804 | DNA-cytosine methyltransferase                |
| P73_4805 | ATP-binding region ATPase domain protein      |
| P73_4806 | Transposase DDE domain group 1                |
| P73_4807 | ATP-binding region ATPase domain protein      |
| P73_4808 | ATPase domain-containing protein              |
| P73_4809 | hypothetical protein                          |
| P73_4811 | transcriptional regulator                     |
| P73_4813 | mobilization protein                          |
| P73_4814 | mobilization protein                          |
| P73_4815 | virD4 protein, putative                       |
| P73_4816 | hypothetical protein                          |
| P73_4817 | replicase                                     |
| P73_4818 | putative site-specific recombinase-resolvase  |
| P73_4819 | Uncharacterized protein conserved in bacteria |
| P73_4820 | chromate resistance exported protein          |
| P73_4822 | hypothetical protein                          |
| P73_4824 | putative MobA                                 |
| P73_4823 | hypothetical protein                          |
| P73_4825 | hypothetical protein                          |
| P73_4826 | MobC                                          |
| P73_4827 | hypothetical protein                          |

## Supplementary References

- 1 Langille, M. G. & Brinkman, F. S. IslandViewer: an integrated interface for computational identification and visualization of genomic islands. *Bioinformatics* **25**, 664-665 (2009).
- 2 Hacker, J., Blum-Oehler, G., Muhldorfer, I. & Tschape, H. Pathogenicity islands of virulent bacteria: structure, function and impact on microbial evolution. *Mol. Microbiol.* **23**, 1089-1097 (1997).
- 3 Saier, M. H., Jr., Yen, M. R., Noto, K., Tamang, D. G. & Elkan, C. The Transporter Classification Database: recent advances. *Nucleic Acids Res.* **37**, D274-278 (2009).
- 4 Davidson, A. L., Dassa, E., Orelle, C. & Chen, J. Structure, function, and evolution of bacterial ATP-binding cassette systems. *Microbiol. Mol. Biol. Rev.* **72**, 317-364 (2008).
- 5 Chang, H. K., Dennis, J. J. & Zylstra, G. J. Involvement of two transport systems and a specific porin in the uptake of phthalate by *Burkholderia* spp. *J. Bacteriol.* **191**, 4671-4673 (2009).
- 6 Mulligan, C., Fischer, M. & Thomas, G. H. Tripartite ATP-independent periplasmic (TRAP) transporters in bacteria and archaea. *FEMS Microbiol. Rev.* **35**, 68-86 (2011).
- 7 Chaudhry, M. T. *et al.* Genome-wide investigation of aromatic acid transporters in *Corynebacterium glutamicum*. *Microbiology* **153**, 857-865 (2007).
- 8 Hosaka, M. *et al.* Novel tripartite aromatic acid transporter essential for terephthalate uptake in *Comamonas* sp. strain E6. *Appl. Environ. Microbiol.* **79**, 6148-6155 (2013).
- 9 Kahng, H. Y., Byrne, A. M., Olsen, R. H. & Kukor, J. J. Characterization and role of *tbuX* in utilization of toluene by *Ralstonia pickettii* PKO1. *J. Bacteriol.* **182**, 1232-1242 (2000).
- 10 Maddocks, S. E. & Oyston, P. C. Structure and function of the LysR-type transcriptional regulator (LTTR) family proteins. *Microbiology* **154**, 3609-3623 (2008).
- 11 Tropel, D. & van der Meer, J. R. Bacterial transcriptional regulators for degradation pathways of aromatic compounds. *Microbiol. Mol. Biol. Rev.* **68**, 474-500 (2004).
- 12 Schell, M. A. Transcriptional control of the *nah* and *sal* hydrocarbon-degradation operons by the *nahR* gene product. *Gene* **36**, 301-309 (1985).
- 13 Molina-Henares, A. J., Krell, T., Eugenia Guazzaroni, M., Segura, A. & Ramos, J. L. Members of the IclR family of bacterial transcriptional regulators function as activators and/or repressors. *FEMS Microbiol. Rev.* **30**, 157-186 (2006).
- 14 Mazur, A., Majewska, B., Stasiak, G., Wielbo, J. & Skorupska, A. *repABC*-based replication systems of *Rhizobium leguminosarum* bv. *trifolii* TA1 plasmids: incompatibility and evolutionary analyses. *Plasmid* **66**, 53-66 (2011).
- 15 Yagi, J. M., Sims, D., Brettin, T., Bruce, D. & Madsen, E. L. The genome of *Polaromonas naphthalenivorans* strain CJ2, isolated from coal tar-contaminated sediment, reveals physiological and metabolic versatility and evolution through extensive horizontal gene transfer. *Environ. Microbiol.* **11**, 2253-2270 (2009).
- 16 Cevallos, M. A., Cervantes-Rivera, R. & Gutierrez-Rios, R. M. The *repABC* plasmid family. *Plasmid* **60**, 19-37 (2008).
- 17 Fang, F. *et al.* Characterization of endogenous plasmids from *Lactobacillus salivarius* UCC118. *Appl. Environ. Microbiol.* **74**, 3216-3228 (2008).
- 18 Tsuchimoto, S., Ohtsubo, H. & Ohtsubo, E. Two genes, *pemK* and *pemI*, responsible for stable maintenance of resistance plasmid R100. *J. Bacteriol.* **170**, 1461-1466 (1988).
- 19 Marx, C. J. & Lidstrom, M. E. Broad-host-range *cre-lox* system for antibiotic marker recycling in gram-negative bacteria. *Biotechniques* **33**, 1062-1067 (2002).
- 20 Deneff, V. J. *et al.* Genetic and genomic insights into the role of benzoate-catabolic pathway redundancy in



- Burkholderia xenovorans* LB400. *Appl. Environ. Microbiol.* **72**, 585-595 (2006).
- 21 Aslanidis, C. & de Jong, P. J. Ligation-independent cloning of PCR products (LIC-PCR). *Nucleic Acids Res.* **18**, 6069-6074 (1990).
